# Supplementary material for: Mechanochemical difluoromethylations of ketones
Source: publisher site journal article supplement (doi:10.3762/bjoc.20.235), 2024-11-04

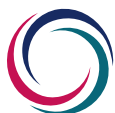

## Supporting Information

for

### **Mechanochemical difluoromethylations of ketones**

Jinbo Ke, Pit van Bonn and Carsten Bolm

*Beilstein J. Org. Chem.* **2024**, *20*, 2799–2805. [doi:10.3762/bjoc.20.235](https://doi.org/10.3762/bjoc.20.235)

**Experimental procedures, optimization studies, compound  
characterization data, NMR spectra, and mechanistic  
investigations**

## Table of contents

|    |                                                     |     |
|----|-----------------------------------------------------|-----|
| 1. | General information                                 | S2  |
| 2. | Investigation of various difluorocarbene precursors | S3  |
| 3. | Difluoromethylations in solution                    | S4  |
| 4. | Mechanochemical difluoromethylations of ketones     | S4  |
| 5. | Analytical data of the products                     | S4  |
| 6. | Unsuccessful difluoromethylations                   | S11 |
| 7. | Mechanistic investigations                          | S12 |
| 8. | References                                          | S20 |
| 9. | NMR spectra                                         | S21 |

## 1. General information

Concentration under reduced pressure was performed by rotary evaporation at 40 °C at an appropriate pressure, unless otherwise stated. All chemicals used were purchased from commercial suppliers and used without further purification unless mentioned. 1-([1,1'-Biphenyl]-4-yl)ethan-1-one [1], 1-(4-phenoxyphenyl)ethan-1-one [2], 1-(6-methoxynaphthalen-2-yl)ethan-1-one [3], 1-(*p*-tolyl)prop-2-en-1-one [4], and 1-(naphthalen-2-yl)ethan-1-one-2,2,2-*d*<sub>3</sub> [5] were prepared according to procedures reported in literature.

Mechanochemical reactions were conducted using a RETSCH Mixer Mill MM 400. PTFE milling vessels (volume: 25 mL) and PTFE milling balls (diameters: 10 mm or 15 mm) were utilized.

Solvents used in the reactions were obtained commercially and used without additional purification. For column chromatographic purification, technical-grade *n*-pentane and acetone were employed, with *n*-pentane further purified by distillation. The deuterated solvent CDCl<sub>3</sub> was purchased commercially, dried through filtration over aluminum oxide and stored over molecular sieves 4 Å.

Purifications by column chromatography were performed using silica gel 60 (particle size 0.04–0.063 mm). The running solvents are indicated as volume ratios (V/V). Thin-layer chromatography was used for reaction control, employing silica gel-covered aluminum foils with a fluorescent indicator (Merck, DC Alumina 60 F254, neutral). The compounds were detected under UV light ( $\lambda = 254$  nm and 366 nm) and with aqueous KMnO<sub>4</sub> stain solution and subsequent heating.

<sup>1</sup>H, <sup>13</sup>C, and <sup>19</sup>F NMR spectra were recorded on a Bruker Avance Neo 400 (400 MHz), Bruker Avance Neo 600 (600 MHz), Varian VNMRS 400 (400 MHz), or Varian VNMRS 600 (600 MHz) spectrometer at ambient temperature. Chemical shifts ( $\delta$ ) are reported in parts per million (ppm) relative to the residual signal of the solvent used. Coupling constants (*J*) are given in hertz (Hz). Signal multiplicities are abbreviated as follows: s = singlet, d = doublet, dd = doublet of doublets, dt = doublet of triplets, t = triplet, td = triplet of doublets, m = multiplet.

Infrared (IR) spectra were recorded on a PerkinElmer Spectrum 100 FT-IR spectrometer equipped with a UATR device featuring a KRS-5 crystal for single reflection.

High-resolution mass spectra (HRMS) were recorded on a Thermo Scientific LTQ Orbitrap XL spectrometer.

## 2. Investigation of various difluorocarbene precursors

A PTFE milling jar (volume: 25 mL) equipped with one milling ball of the same material (diameter: 12 mm) was loaded with 4'-methylacetophenone (**1a**, 28.1  $\mu$ L, 0.200 mmol, 1.00 equiv), difluorocarbene precursor, activator, and additive. The jar was closed in air, transferred to a mixer mill, and shaken for 1 h. After the milling, the jar was opened in air, and a stock solution of dichloroethane (0.200 mmol, 1.00 equiv) as the internal standard in CDCl<sub>3</sub> was added. The resulting suspension was filtered over cotton, and the yield of the product **3a** was determined by quantitative <sup>1</sup>H NMR spectroscopy.

**Table S1:** Investigation of different difluorocarbene precursors in the difluoromethylation of ketone **1a**.<sup>a</sup>

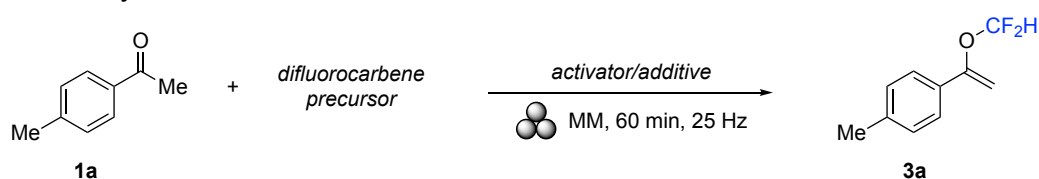

difluorocarbene precursor:

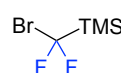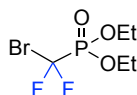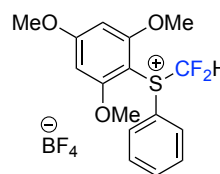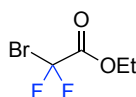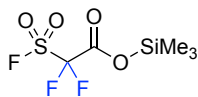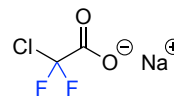

| Entry | Ref. | Difluorocarbene precursor (equiv) | Activator/additive (equiv)            | Yield of <b>3a</b> (%) <sup>b</sup> |
|-------|------|-----------------------------------|---------------------------------------|-------------------------------------|
| 1     | [6]  | <b>2</b> (2.0)                    | KFHF (4.0), KCl (4.0)                 | 69                                  |
| 2     | [7]  | <b>4</b> (2.0)                    | K <sub>3</sub> PO <sub>4</sub> (8.0)  | 0                                   |
| 3     | [8]  | <b>5</b> (2.0)                    | –                                     | 0                                   |
| 4     | [9]  | <b>6</b> (2.0)                    | Cs <sub>2</sub> CO <sub>3</sub> (8.0) | 0                                   |
| 5     | [10] | <b>7</b> (1.5)                    | KF (4.0)                              | trace                               |
| 6     | [11] | <b>8</b> (2.0)                    | Cs <sub>2</sub> CO <sub>3</sub> (4.0) | 0                                   |
| 7     | –    | –                                 | KFHF (4.0), KCl (4.0)                 | 0                                   |

<sup>a</sup>Performed with one PTFE milling ball (diameter: 12 mm). <sup>b</sup>Determined by <sup>1</sup>H NMR spectroscopy using 1,2-dichloroethane as the internal standard.

### 3. Difluoromethylations in solution

The difluoromethylations of ketone **1a** were carried out under slightly modified conditions **A** or **B** according to procedures reported in literature [12]. 4'-Methylacetophenone (**1a**, 28.1  $\mu\text{L}$ , 0.200 mmol, 1.00 equiv), KFHF (**A**, 62.5 mg, 0.800 mmol, 4.00 equiv) or KOAc (**B**, 80.9 mg, 0.800 mmol, 4.00 equiv),  $\text{CH}_2\text{Cl}_2$  (0.2 mL) and  $\text{H}_2\text{O}$  (0.2 mL) were added into a PTFE tube (10 mL) with a cap. Then, the reaction mixture was stirred at room temperature and  $\text{TMSCF}_2\text{Br}$  (**2**, 65.5  $\mu\text{L}$ , 0.400 mmol, 2.00 equiv) was added. After 10 h the reaction mixture was diluted with  $\text{CH}_2\text{Cl}_2$  (5 mL), and  $\text{PhOCF}_3$  (40.1  $\mu\text{L}$ , 0.300 mmol, 1.5 equiv) was added as the internal standard. The organic layer was analyzed by  $^{19}\text{F}$  NMR spectroscopy.

### 4. Mechanochemical difluoromethylations of ketones

A PTFE milling jar (25 mL) equipped with two PTFE milling balls (diameter: 10 mm) was loaded with ketone **1** (0.200 mmol, 1.00 equiv), activator KFHF (62.5 mg, 0.800 mmol, 4.00 equiv), and the chloride salt [**GP1**: CsCl (136 mg, 0.800 mmol, 4.00 equiv); **GP2**: KCl (59.6 mg, 0.800 mmol, 4.00 equiv)]. Subsequently,  $\text{TMSCF}_2\text{Br}$  (**2**, 65.5  $\mu\text{L}$ , 0.400 mmol, 2.00 equiv) was added, and the jar was tightly closed. After milling for 90 min at 25 Hz, the reaction mixture was suspended with a stock solution of 1,2-dichloroethane (0.200 mmol, 1.00 equiv) as the internal standard in  $\text{CDCl}_3$ . The resulting solution was filtered over cotton, and the yield of the product was determined by  $^1\text{H}$  NMR spectroscopy. The jar was extracted with acetone (3  $\times$  2 mL) and the combined organic phase filtered over cotton and concentrated. Product **3** was obtained after purification by flash column chromatography on silica gel and evaporation of the solvent.

### 5. Analytical data of the products

#### 1-[1-(Difluoromethoxy)vinyl]-4-methylbenzene (**3a**)

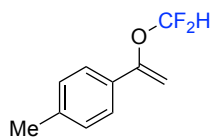

Following the **GP1**, difluoromethyl enol ether **3a** was obtained from 4'-methylacetophenone (**1a**, 28.1  $\mu\text{L}$ , 0.200 mmol, 1.00 equiv) in 74% yield determined by  $^1\text{H}$  NMR spectroscopy.

**NMR yield:** 74% [ $\delta_{\text{DCE}} = 3.73$  (s, 4H) ppm;  $\delta_{\text{product}} = 5.08$  (d,  $J = 3.3$  Hz, 1H), 4.69 (d,  $J = 3.3$  Hz, 1H) ppm].

**$^1\text{H}$  NMR** (600 MHz,  $\text{CDCl}_3$ ):  $\delta = 7.49$  (d,  $J = 8.3$  Hz, 2H), 7.18 (d,  $J = 8.0$  Hz, 2H), 6.52 (t,  $^2J_{\text{F}} = 74.2$  Hz, 1H), 5.08 (d,  $J = 3.3$  Hz, 1H), 4.69 (d,  $J = 3.3$  Hz, 1H), 2.37 (s, 3H) ppm.

**$^{19}\text{F}$  NMR** (565 MHz,  $\text{CDCl}_3$ ):  $\delta = -81.39$  (d,  $J = 74.3$  Hz, 2F) ppm.

$^{13}\text{C}$  NMR (151 MHz,  $\text{CDCl}_3$ ):  $\delta$  = 154.4, 139.5, 130.8, 129.2, 125.2, 115.9 (t,  $^1J_{\text{F}} = 256.7$  Hz), 92.2, 21.2 ppm.

### 1-(Difluoromethoxy)vinyl]benzene (**3b**)

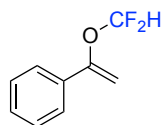

Following the **GP2**, difluoromethyl enol ether **3b** was obtained from acetophenone (**1b**, 23.3  $\mu\text{L}$ , 0.200 mmol, 1.00 equiv) in 56% yield determined by  $^1\text{H}$  NMR spectroscopy.

**NMR yield:** 56% [ $\delta_{\text{DCE}} = 3.73$  (s, 4H) ppm;  $\delta_{\text{product}} = 5.14$  (dd,  $J = 3.4, 0.9$  Hz, 1H), 4.75 (dd,  $J = 3.4, 0.9$  Hz, 1H) ppm].

$^1\text{H}$  NMR (600 MHz,  $\text{CDCl}_3$ ):  $\delta$  = 7.62 – 7.56 (m, 2H), 7.42 – 7.34 (m, 3H), 6.53 (t,  $^2J_{\text{F}} = 74.0$  Hz, 1H), 5.14 (dd,  $J = 3.4, 0.9$  Hz, 1H), 4.75 (dd,  $J = 3.4, 0.9$  Hz, 1H) ppm.

$^{19}\text{F}$  NMR (565 MHz,  $\text{CDCl}_3$ ):  $\delta$  = -81.56 (d,  $J = 74.1$  Hz, 2F) ppm.

$^{13}\text{C}$  NMR (151 MHz,  $\text{CDCl}_3$ ):  $\delta$  = 154.3, 133.6, 129.5, 128.5, 125.3, 115.8 (t,  $^1J_{\text{F}} = 256.7$  Hz), 93.1 ppm.

**IR** (neat):  $\tilde{\nu} = 2925, 2845, 2158, 1686, 1636, 1578, 1495, 1446, 1382, 1276, 1126, 1049, 963, 919, 846, 769, 689$   $\text{cm}^{-1}$ .

**HRMS (EI):**  $m/z$  calculated for  $\text{C}_9\text{H}_8\text{OF}_2$ : 170.0543  $[\text{M}]^+$ , found 170.0538.

The NMR spectra are in accordance with the literature [13].

### 1-Chloro-4-[1-(difluoromethoxy)vinyl]benzene (**3c**)

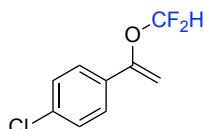

Following the **GP2**, difluoromethyl enol ether **3c** was obtained from 4'-chloroacetophenone (**1c**, 26.7  $\mu\text{L}$ , 0.200 mmol, 1.00 equiv) in 53% yield (21.9 mg, 0.107 mmol). Eluent: *n*-pentane [ $R_{\text{F}} = 0.43$ ].

$^1\text{H}$  NMR (600 MHz,  $\text{CDCl}_3$ ):  $\delta$  = 7.52 (d,  $J = 8.7$  Hz, 2H), 7.34 (d,  $J = 8.7$  Hz, 2H), 6.52 (t,  $^2J_{\text{F}} = 73.7$  Hz, 1H), 5.12 (d,  $J = 3.7$  Hz, 1H), 4.76 (d,  $J = 3.6$  Hz, 1H) ppm.

$^{19}\text{F}$  NMR (565 MHz,  $\text{CDCl}_3$ ):  $\delta$  = -81.77 (d,  $J = 74.3$  Hz, 2F) ppm.

$^{13}\text{C}$  NMR (101 MHz,  $\text{CDCl}_3$ ):  $\delta$  = 153.2, 135.4, 132.1, 128.7, 126.6, 115.7 (t,  $^1J_{\text{F}} = 252.5$  Hz), 93.3 ppm.

**IR** (neat):  $\tilde{\nu} = 2927, 2856, 2160, 1909, 1633, 1596, 1491, 1384, 1359, 1282, 1129, 1051, 964, 907, 833, 791, 731, 662$   $\text{cm}^{-1}$ .

**HRMS (EI):**  $m/z$  calculated for  $\text{C}_9\text{H}_7\text{OCIF}_2$ : 204.0154  $[\text{M}]^+$ , found 204.0148.

### 1-Bromo-4-[1-(difluoromethoxy)vinyl]benzene (3d)

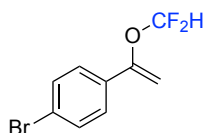

Following the **GP1**, difluoromethyl enol ether **3d** was obtained from 4'-bromoacetophenone (**1d**, 40.6 mg, 0.200 mmol, 1.00 equiv) in 39% yield (19.4 mg, 0.0779 mmol). Eluent: *n*-pentane [ $R_F$  = 0.43].

**$^1\text{H NMR}$**  (600 MHz,  $\text{CDCl}_3$ ):  $\delta$  = 7.51 (d,  $J$  = 8.7 Hz, 2H), 7.46 (d,  $J$  = 8.7 Hz, 2H), 6.52 (t,  $^2J_F$  = 73.7 Hz, 1H), 5.13 (d,  $J$  = 3.5 Hz, 1H), 4.77 (d,  $J$  = 3.5 Hz, 1H) ppm.

**$^{19}\text{F NMR}$**  (565 MHz,  $\text{CDCl}_3$ ):  $\delta$  = -81.76 (d,  $J$  = 73.4 Hz, 2F) ppm.

**$^{13}\text{C NMR}$**  (101 MHz,  $\text{CDCl}_3$ ):  $\delta$  = 153.3, 132.5, 131.6, 126.9, 123.7, 115.7 (t,  $^1J_F$  = 252.5 Hz), 93.4 ppm.

**IR** (neat):  $\tilde{\nu}$  = 2926, 2855, 2299, 2113, 1906, 1687, 1636, 1590, 1487, 1384, 1278, 1128, 1053, 1009, 964, 830, 784, 723, 663  $\text{cm}^{-1}$ .

**HRMS (EI)**:  $m/z$  calculated for  $\text{C}_9\text{H}_7\text{OBrF}_2$ : 247.9648  $[\text{M}]^+$ , found 247.9643.

### 1-[1-(Difluoromethoxy)vinyl]-4-isobutylbenzene (3e)

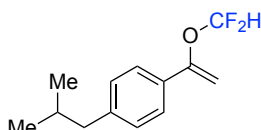

Following the **GP2**, difluoromethyl enol ether **3e** was obtained from 4'-isobutylacetophenone (**1e**, 37.5  $\mu\text{L}$ , 0.200 mmol, 1.00 equiv) in 35% yield (16.0 mg, 0.0707 mmol). Eluent: *n*-pentane [ $R_F$  = 0.58].

**$^1\text{H NMR}$**  (600 MHz,  $\text{CDCl}_3$ ):  $\delta$  = 7.50 (d,  $J$  = 7.5 Hz, 2H), 7.15 (d,  $J$  = 7.9 Hz, 2H), 6.52 (t,  $^2J_F$  = 74.1 Hz, 1H), 5.09 (d,  $J$  = 3.3 Hz, 1H), 4.70 (d,  $J$  = 3.3 Hz, 1H), 2.49 (d,  $J$  = 7.2 Hz, 2H), 1.92 – 1.82 (m, 1H), 0.90 (d,  $J$  = 6.6 Hz, 6H) ppm.

**$^{19}\text{F NMR}$**  (565 MHz,  $\text{CDCl}_3$ ):  $\delta$  = -81.37 (d,  $J$  = 74.4 Hz, 2F) ppm.

**$^{13}\text{C NMR}$**  (101 MHz,  $\text{CDCl}_3$ ):  $\delta$  = 154.5, 143.4, 131.0, 129.2, 125.1, 115.9 (t,  $^1J_F$  = 252.5 Hz), 92.3, 45.1, 30.2, 22.3 ppm.

**IR** (neat):  $\tilde{\nu}$  = 3438, 2959, 2925, 2871, 2253, 1917, 1736, 1634, 1567, 1511, 1464, 1383, 1278, 1134, 1056, 964, 909, 846, 803, 734, 655, 534  $\text{cm}^{-1}$ .

**HRMS (EI)**:  $m/z$  calculated for  $\text{C}_{13}\text{H}_{16}\text{OF}_2$ : 226.1169  $[\text{M}]^+$ , found 226.1164.

### 1-[1-(Difluoromethoxy)vinyl]-2-methylbenzene (3f)

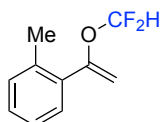

Following the **GP1**, difluoromethyl enol ether **3f** was obtained from 2'-methylacetophenone (**1f**, 26.2  $\mu\text{L}$ , 0.200 mmol, 1.00 equiv) in 34% yield determined by  $^1\text{H NMR}$  spectroscopy.

**NMR yield**: 34% [ $\delta_{\text{DCE}}$  = 3.73 (s, 4H) ppm;  $\delta_{\text{product}}$  = 4.89 (d,  $J$  = 2.7 Hz, 1H), 4.68 (d,  $J$  = 2.8 Hz, 1H) ppm].

**<sup>1</sup>H NMR** (600 MHz, CDCl<sub>3</sub>): δ = 7.33 (dd, *J* = 7.5, 1.5 Hz, 1H), 7.31 – 7.27 (m, 1H), 7.23 – 7.17 (m, 2H), 6.44 (t, <sup>2</sup>*J*<sub>F</sub> = 74.2 Hz, 1H), 4.89 (d, *J* = 2.7 Hz, 1H), 4.68 (d, *J* = 2.8 Hz, 1H), 2.38 (s, 3H) ppm.

**<sup>19</sup>F NMR** (564 MHz, CDCl<sub>3</sub>): δ = –82.77 (d, *J* = 74.3 Hz, 2F) ppm.

**<sup>13</sup>C NMR** (151 MHz, CDCl<sub>3</sub>): δ = 155.4, 136.5, 132.0, 131.5, 130.6, 129.4, 125.8, 115.3 (t, <sup>1</sup>*J*<sub>F</sub> = 256.7 Hz), 97.0, 20.1 ppm.

### 1-[1-(Difluoromethoxy)viny]-2-methoxybenzene (3g)

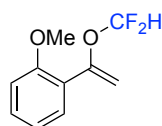

Following the **GP1**, difluoromethyl enol ether **3g** was obtained from 2'-methoxyacetophenone (**1g**, 27.6 μL, 0.200 mmol, 1.00 equiv) in 56% yield determined by <sup>1</sup>H NMR spectroscopy.

**NMR yield:** 56% [δ<sub>DCE</sub> = 3.73 (s, 4H) ppm; δ<sub>product</sub> = 5.23 (dt, *J* = 2.2, 1.1 Hz, 1H), 4.99 (dd, *J* = 2.2, 1.0 Hz, 1H) ppm].

**<sup>1</sup>H NMR** (600 MHz, CDCl<sub>3</sub>): δ = 7.47 (dd, *J* = 7.6, 1.8 Hz, 1H), 7.36 – 7.33 (m, 1H), 6.99 – 6.96 (m, 1H), 6.94 (dd, *J* = 8.3, 1.1 Hz, 1H), 6.45 (t, <sup>2</sup>*J*<sub>F</sub> = 74.7 Hz, 1H), 5.23 (dt, *J* = 2.2, 1.1 Hz, 1H), 4.99 (dd, *J* = 2.2, 1.0 Hz, 1H), 3.87 (s, 3H) ppm.

**<sup>19</sup>F NMR** (564 MHz, CDCl<sub>3</sub>): δ = –80.57 (d, *J* = 74.6 Hz, 2F) ppm.

**<sup>13</sup>C NMR** (151 MHz, CDCl<sub>3</sub>): δ = 157.3, 152.1, 130.6, 129.4, 122.9, 120.5, 116.3 (t, <sup>1</sup>*J*<sub>F</sub> = 256.7 Hz), 111.2, 99.7, 55.6 ppm.

### 2-[1-(Difluoromethoxy)viny]-1,3,5-trimethylbenzene (3h)

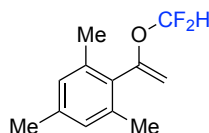

Following the **GP1**, difluoromethyl enol ether **3h** was obtained from 2',4',6'-trimethylacetophenone (**1h**, 34.0 μL, 0.200 mmol, 1.00 equiv) as a colorless liquid in 42% yield (18.0 mg, 0.0848 mmol). Eluent: *n*-pentane [*R*<sub>F</sub> = 0.38].

**<sup>1</sup>H NMR** (600 MHz, CDCl<sub>3</sub>): δ = 6.89 (s, 2H), 6.36 (t, <sup>2</sup>*J*<sub>F</sub> = 74.5, 1H), 4.98 (d, *J* = 2.6 Hz, 1H), 4.50 (d, *J* = 2.6 Hz, 1H), 2.29 (d, *J* = 6.3 Hz, 9H) ppm.

**<sup>19</sup>F NMR** (565 MHz, CDCl<sub>3</sub>): δ = –83.12 (d, *J* = 74.5 Hz, 2F) ppm.

**<sup>13</sup>C NMR** (151 MHz, CDCl<sub>3</sub>): δ = 152.8, 138.9, 136.9, 131.0, 128.3, 115.1 (t, <sup>1</sup>*J*<sub>F</sub> = 256.7 Hz), 97.3, 21.1, 19.7 ppm.

**IR** (neat):  $\tilde{\nu}$  = 2924, 2864, 2331, 2093, 1992, 1898, 1648, 1611, 1575, 1447, 1378, 1263, 1126, 1049, 958, 908, 852, 739 cm<sup>-1</sup>.

**HRMS (EI):** *m/z* calculated for C<sub>12</sub>H<sub>14</sub>OF<sub>2</sub>: 212.1013 [M]<sup>+</sup>, found 212.1008.



### 2-[1-(Difluoromethoxy)vinyl]naphthalene (**3i**)

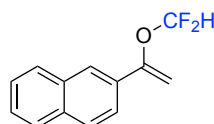

Following the **GP1**, difluoromethyl enol ether **3i** was obtained from 2-acetonaphthone (**1i**, 34.4 mg, 0.200 mmol, 1.00 equiv) in 66% yield determined by  $^1\text{H}$  NMR spectroscopy.

**NMR yield:** 66% [ $\delta_{\text{DCE}} = 3.73$  (s, 4H) ppm;  $\delta_{\text{product}} = 5.29$  (d,  $J = 3.4$  Hz, 1H), 4.86 (d,  $J = 3.5$  Hz, 1H) ppm].

$^1\text{H}$  NMR (600 MHz,  $\text{CDCl}_3$ ):  $\delta = 8.11 - 8.08$  (m, 1H), 7.88 (dt,  $J = 6.2, 3.6$  Hz, 1H), 7.85 – 7.82 (m, 2H), 7.66 (dd,  $J = 8.6, 1.9$  Hz, 1H), 7.51 (dt,  $J = 6.2, 3.4$  Hz, 2H), 6.60 (t,  $^2J_{\text{F}} = 74.0$  Hz, 1H), 5.29 (d,  $J = 3.4$  Hz, 1H), 4.86 (d,  $J = 3.5$  Hz, 1H) ppm.

$^{19}\text{F}$  NMR (565 MHz,  $\text{CDCl}_3$ ):  $\delta = -81.28$  (d,  $J = 74.3$  Hz, 2F) ppm.

$^{13}\text{C}$  NMR (151 MHz,  $\text{CDCl}_3$ ):  $\delta = 154.3, 133.7, 133.0, 130.7, 128.7, 128.3, 127.6, 126.9, 126.6, 124.9, 122.7, 115.9$  (t,  $^1J_{\text{F}} = 256.7$  Hz), 93.7 ppm.

**IR** (neat):  $\tilde{\nu} = 3438, 3059, 2921, 2852, 2396, 2285, 1923, 1806, 1678, 1631, 1575, 1507, 1466, 1435, 1382, 1286, 1235, 1197, 1127, 1051, 966, 900, 856, 817, 750, 718, 664, 575, 533, 475$   $\text{cm}^{-1}$ .

**HRMS (EI):**  $m/z$  calculated for  $\text{C}_{13}\text{H}_{10}\text{OF}_2$ : 220.0700  $[\text{M}]^+$ , found 220.0694.

### [3-(Difluoromethoxy)but-3-en-1-yl]benzene (**3j**)

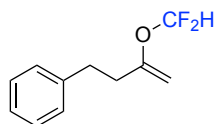

Following the **GP1**, difluoromethyl enol ether **3j** was obtained from benzylacetone (**1j**, 30.3  $\mu\text{L}$ , 0.200 mmol, 1.00 equiv) in 42% yield determined by  $^1\text{H}$  NMR spectroscopy.

**NMR yield:** 42% [ $\delta_{\text{DCE}} = 3.73$  (s, 4H) ppm;  $\delta_{\text{product}} = 4.33$  (dt,  $J = 3.0, 1.0$  Hz, 1H), 4.29 (dt,  $J = 3.0, 1.0$  Hz, 1H) ppm].

$^1\text{H}$  NMR (600 MHz,  $\text{CDCl}_3$ ):  $\delta = 7.31 - 7.28$  (m, 2H), 7.20 – 7.18 (m, 3H), 6.38 (t,  $^2J_{\text{F}} = 74.3$  Hz, 1H), 4.33 (dt,  $J = 3.0, 1.0$  Hz, 1H), 4.29 (dt,  $J = 3.0, 1.0$  Hz, 1H), 2.84 (t,  $J = 7.6$  Hz, 2H), 2.47 (t,  $J = 8.0$  Hz, 2H) ppm.

$^{19}\text{F}$  NMR (564 MHz,  $\text{CDCl}_3$ ):  $\delta = -82.56$  (d,  $J = 74.1$  Hz, 2F) ppm.

$^{13}\text{C}$  NMR (151 MHz,  $\text{CDCl}_3$ ):  $\delta = 156.4, 140.6, 128.4, 128.4, 126.1, 115.2$  (t,  $^1J_{\text{F}} = 256.7$  Hz), 91.5, 36.0, 32.8 ppm.

**IR** (neat):  $\tilde{\nu} = 3064, 3028, 2927, 2858, 2326, 2085, 1998, 1653, 1604, 1496, 1453, 1380, 1288, 1254, 1126, 1046, 972, 916, 845, 744, 698, 658$   $\text{cm}^{-1}$ .

**HRMS (EI):**  $m/z$  calculated for  $\text{C}_{11}\text{H}_{12}\text{OF}_2$ : 198.0856  $[\text{M}]^+$ , found 198.0851.

### 2,4-Dichloro-1-[3-(difluoromethoxy)buta-1,3-dien-1-yl]benzene (3k)

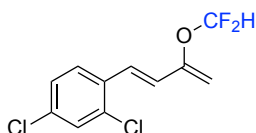

Following the **GP1**, difluoromethyl enol ether **3k** was obtained from 2,4-dichlorobenzylideneacetone (**1k**, 44.3 mg, 0.200 mmol, 1.00 equiv) in 51% yield determined by  $^1\text{H}$  NMR spectroscopy, and in 13% yield (6.8 mg, 0.0257 mmol) after column chromatography. Eluent: *n*-pentane [ $R_F$  = 0.39].

**NMR yield:** 51% [ $\delta_{\text{DCE}}$  = 3.73 (s, 4H) ppm;  $\delta_{\text{product}}$  = 6.64 – 6.35 (m, 2H), 4.79 (d,  $J$  = 6.9 Hz, 2H) ppm].

**$^1\text{H}$  NMR** (600 MHz,  $\text{CDCl}_3$ ):  $\delta$  = 7.47 (d,  $J$  = 8.5 Hz, 1H), 7.40 (s, 1H), 7.28 – 7.25 (m, 1H), 7.22 (d,  $J$  = 8.4 Hz, 1H), 6.50 (t,  $J$  = 75.0 Hz, 1H), 6.49 (d,  $J$  = 18.0 Hz, 1H), 4.79 (d,  $J$  = 6.9 Hz, 2H) ppm.

**$^{19}\text{F}$  NMR** (565 MHz,  $\text{CDCl}_3$ ):  $\delta$  = –81.60 (d,  $J$  = 73.7 Hz, 2F) ppm.

**$^{13}\text{C}$  NMR** (151 MHz,  $\text{CDCl}_3$ ):  $\delta$  = 152.6, 134.4, 134.4, 132.8, 129.7, 127.5, 127.3, 126.0, 125.1, 115.5 (t,  $^1J_F$  = 256.7 Hz), 98.8 ppm.

**IR** and **HRMS** measurements were not successful.

### 3-(Difluoromethoxy)-1-phenylbut-2-en-1-one (3l)

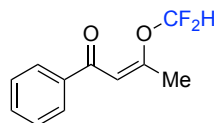

Following the **GP2**, difluoromethyl enol ether **3l** was obtained from benzoylacetone (**1l**, 33.1 mg, 0.200 mmol, 1.00 equiv) in 25% yield (10.5 mg, 0.0495 mmol).

**$^1\text{H}$  NMR** (600 MHz,  $\text{CDCl}_3$ ):  $\delta$  = 7.62 – 7.59 (m, 2H), 7.51 – 7.48 (m, 1H), 7.47 – 7.44 (m, 2H), 6.53 (t,  $^2J_F$  = 74.2 Hz, 1H), 6.11 (s, 1H), 2.48 (s, 3H) ppm.

**$^{19}\text{F}$  NMR** (564 MHz,  $\text{CDCl}_3$ ):  $\delta$  = –82.48 (d,  $J$  = 74.1 Hz, 2F) ppm.

**$^{13}\text{C}$  NMR** (151 MHz,  $\text{CDCl}_3$ ):  $\delta$  = 196.7, 132.9, 131.4, 129.1, 128.5, 127.3, 116.1 (t,  $^1J_F$  = 256.7 Hz), 115.9, 31.5 ppm.

**IR** (neat):  $\tilde{\nu}$  = 3499, 2926, 2855, 2328, 2160, 2111, 1993, 1898, 1692, 1665, 1600, 1493, 1447, 1424, 1359, 1258, 1182, 1105, 1054, 894, 835, 772, 695  $\text{cm}^{-1}$ .

**HRMS (ESI):**  $m/z$  calculated for  $\text{C}_{11}\text{H}_{10}\text{O}_2\text{F}_2\text{Na}$ : 235.0547 [ $\text{M}+\text{Na}$ ] $^+$ , found 235.0541. The NMR spectra are in accordance with the literature [14].

### 4-(Difluoromethoxy)-2H-chromene (3m)

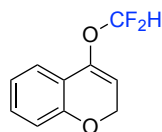

Following the **GP1**, difluoromethyl enol ether **3m** was obtained from 4-chromanone (**1m**, 30.5 mg, 0.200 mmol, 1.00 equiv) in 50% yield determined by  $^1\text{H}$  NMR spectroscopy.

**NMR yield:** 50% [ $\delta_{\text{DCE}}$  = 3.73 (s, 4H) ppm;  $\delta_{\text{product}}$  = 5.23 (t,  $J$  = 3.8 Hz, 1H) ppm].

**<sup>1</sup>H NMR** (600 MHz, CDCl<sub>3</sub>): δ = 7.35 (dd, *J* = 7.7, 1.7 Hz, 1H), 7.21 (td, *J* = 7.8, 1.7 Hz, 1H), 6.94 (td, *J* = 7.5, 1.2 Hz, 1H), 6.82 (dd, *J* = 8.1, 1.1 Hz, 1H), 6.51 (t, <sup>2</sup>*J*<sub>F</sub> = 73.8 Hz, 1H), 5.23 (t, *J* = 3.8 Hz, 1H), 4.88 (d, *J* = 3.9 Hz, 2H) ppm.

**<sup>19</sup>F NMR** (564 MHz, CDCl<sub>3</sub>): δ = -81.77 (d, *J* = 73.7 Hz, 2F) ppm.

**<sup>13</sup>C NMR** (151 MHz, CDCl<sub>3</sub>): δ = 161.9, 136.7, 136.1, 130.7, 130.0, 127.1, 121.4, 117.9 (t, <sup>1</sup>*J*<sub>F</sub> = 6.0 Hz), 100.3, 67.0 ppm.

### 1-(Difluoromethoxy)-7-phenylcyclohept-1-ene (3n)

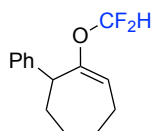

Following the **GP1**, difluoromethyl enol ether **3n** was obtained from 2-phenylcycloheptanone (**1n**, 37.7 mg, 0.200 mmol, 1.00 equiv) in 44% yield determined by <sup>1</sup>H NMR spectroscopy, and in 18% yield (8.60 mg, 0.0361 mmol) after purification.

**<sup>1</sup>H NMR** (600 MHz, CDCl<sub>3</sub>): δ = 7.34 – 7.29 (m, 2H), 7.25 – 7.21 (m, 3H), 6.21 (dd, <sup>2</sup>*J*<sub>F</sub> = 76.6, 73.5 Hz, 1H), 5.61 (t, *J* = 6.5 Hz, 1H), 3.74 (t, *J* = 5.6 Hz, 1H), 2.29 – 2.14 (m, 2H), 2.05 – 1.99 (m, 2H), 1.76 – 1.65 (m, 2H), 1.65 – 1.58 (m, 1H), 1.49 (tt, *J* = 12.6, 6.1 Hz, 1H) ppm.

**<sup>19</sup>F NMR** (565 MHz, CDCl<sub>3</sub>): δ = -80.44 (d, *J* = 73.5 Hz, 2F) ppm.

**<sup>13</sup>C NMR** (151 MHz, CDCl<sub>3</sub>): δ = 153.4, 140.4, 128.4, 127.7, 126.4, 114.0 (t, <sup>1</sup>*J*<sub>F</sub> = 191.9 Hz), 58.8, 43.4, 32.0, 26.5, 24.0, 23.4 ppm.

**IR** (neat):  $\tilde{\nu}$  = 3374, 3028, 2927, 2857, 2325, 2157, 2084, 1992, 1723, 1670, 1601, 1493, 1450, 1373, 1258, 1162, 1023, 867, 795, 699 cm<sup>-1</sup>.

**HRMS (EI)**: *m/z* calculated for C<sub>14</sub>H<sub>16</sub>OF<sub>2</sub>: 238.1169 [M]<sup>+</sup>, found 238.1164.

## 6. Unsuccessful difluoromethylations

### 6.1. Use of aryl ketones

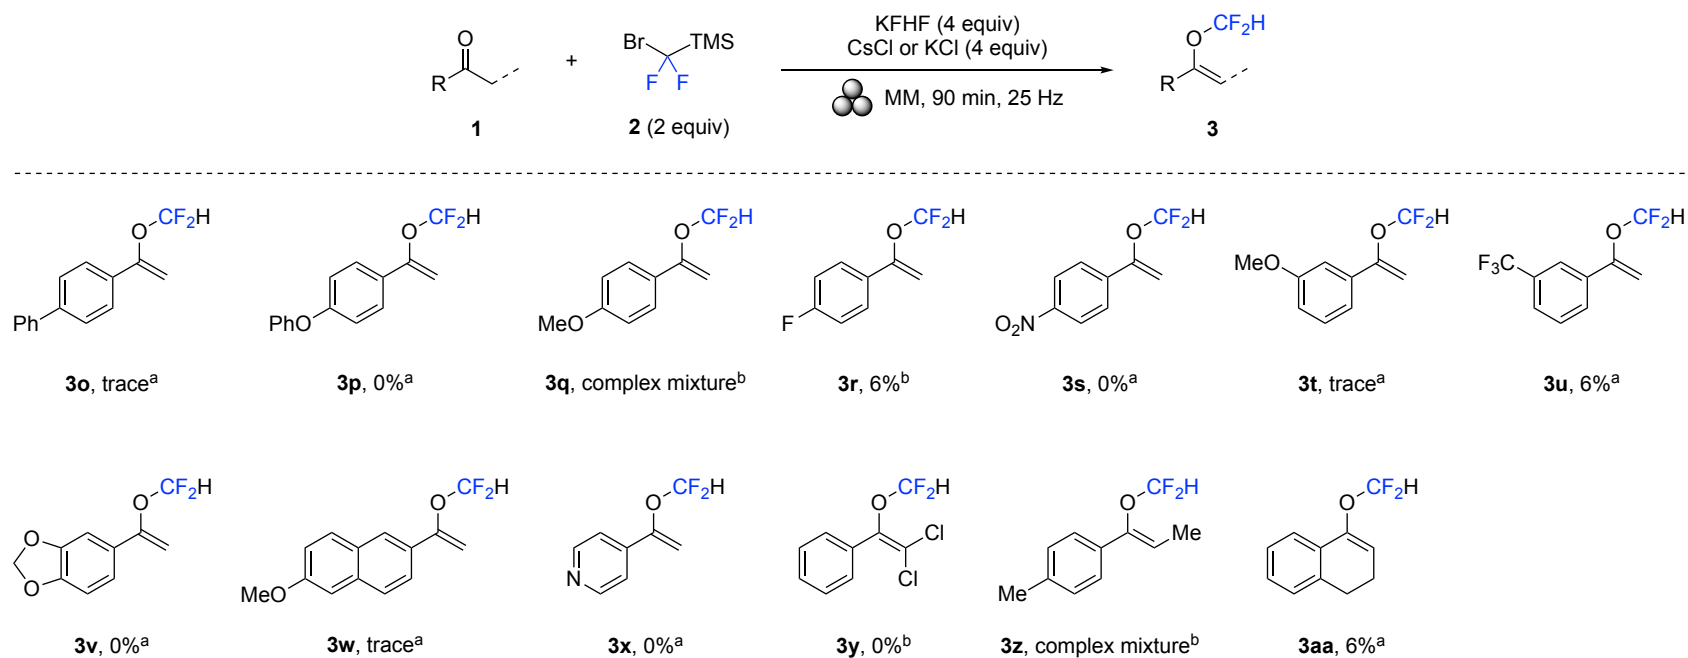

**Scheme S1:** Products that could only be obtained in traces or not at all following the general procedure for the difluoromethylation of ketones. The yields were determined by  $^1\text{H}$  NMR spectroscopy using 1,2-dichloroethane as the internal standard. <sup>a</sup>With  $\text{CsCl}$ . <sup>b</sup>With  $\text{KCl}$ .

## 6.2. Use of 1-aryl prop-2-en-1-ones

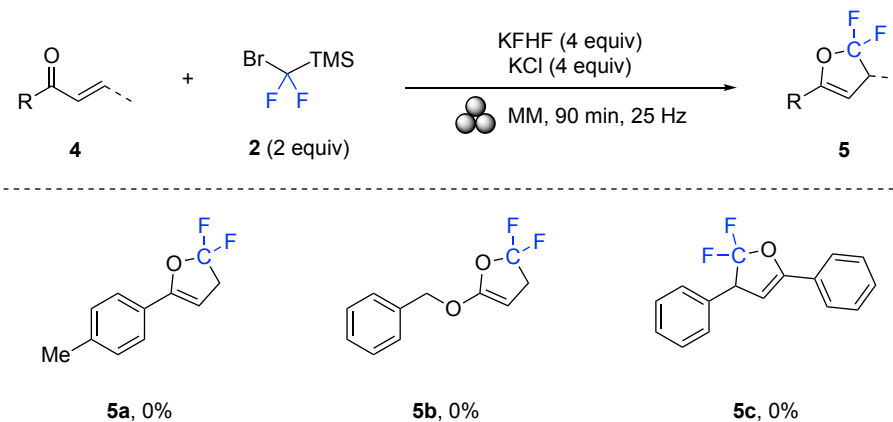

**Scheme S2:** 1-Aryl 2,2-difluoro-2,3-dihydrofurans that could not be obtained from the corresponding prop-2-en-1-ones following the general procedure for the difluoromethylation of ketones.

## 7. Mechanistic investigations

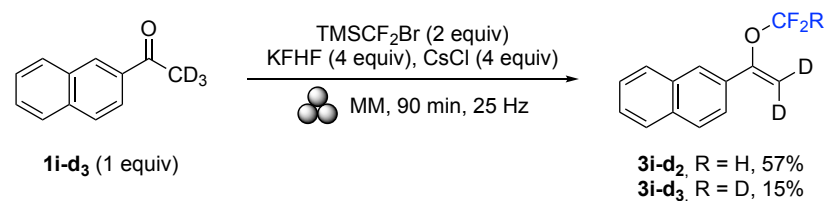

**Scheme S3:** Difluoromethylation of deuterated 2-acetonaphthone ( $\mathbf{1j-d}_3$ ). The yield was determined by  $^1\text{H}$  NMR spectroscopy using 1,2-dichloroethane (1.00 equiv) as the internal standard.

**<sup>1</sup>H NMR of the crude reaction mixture**

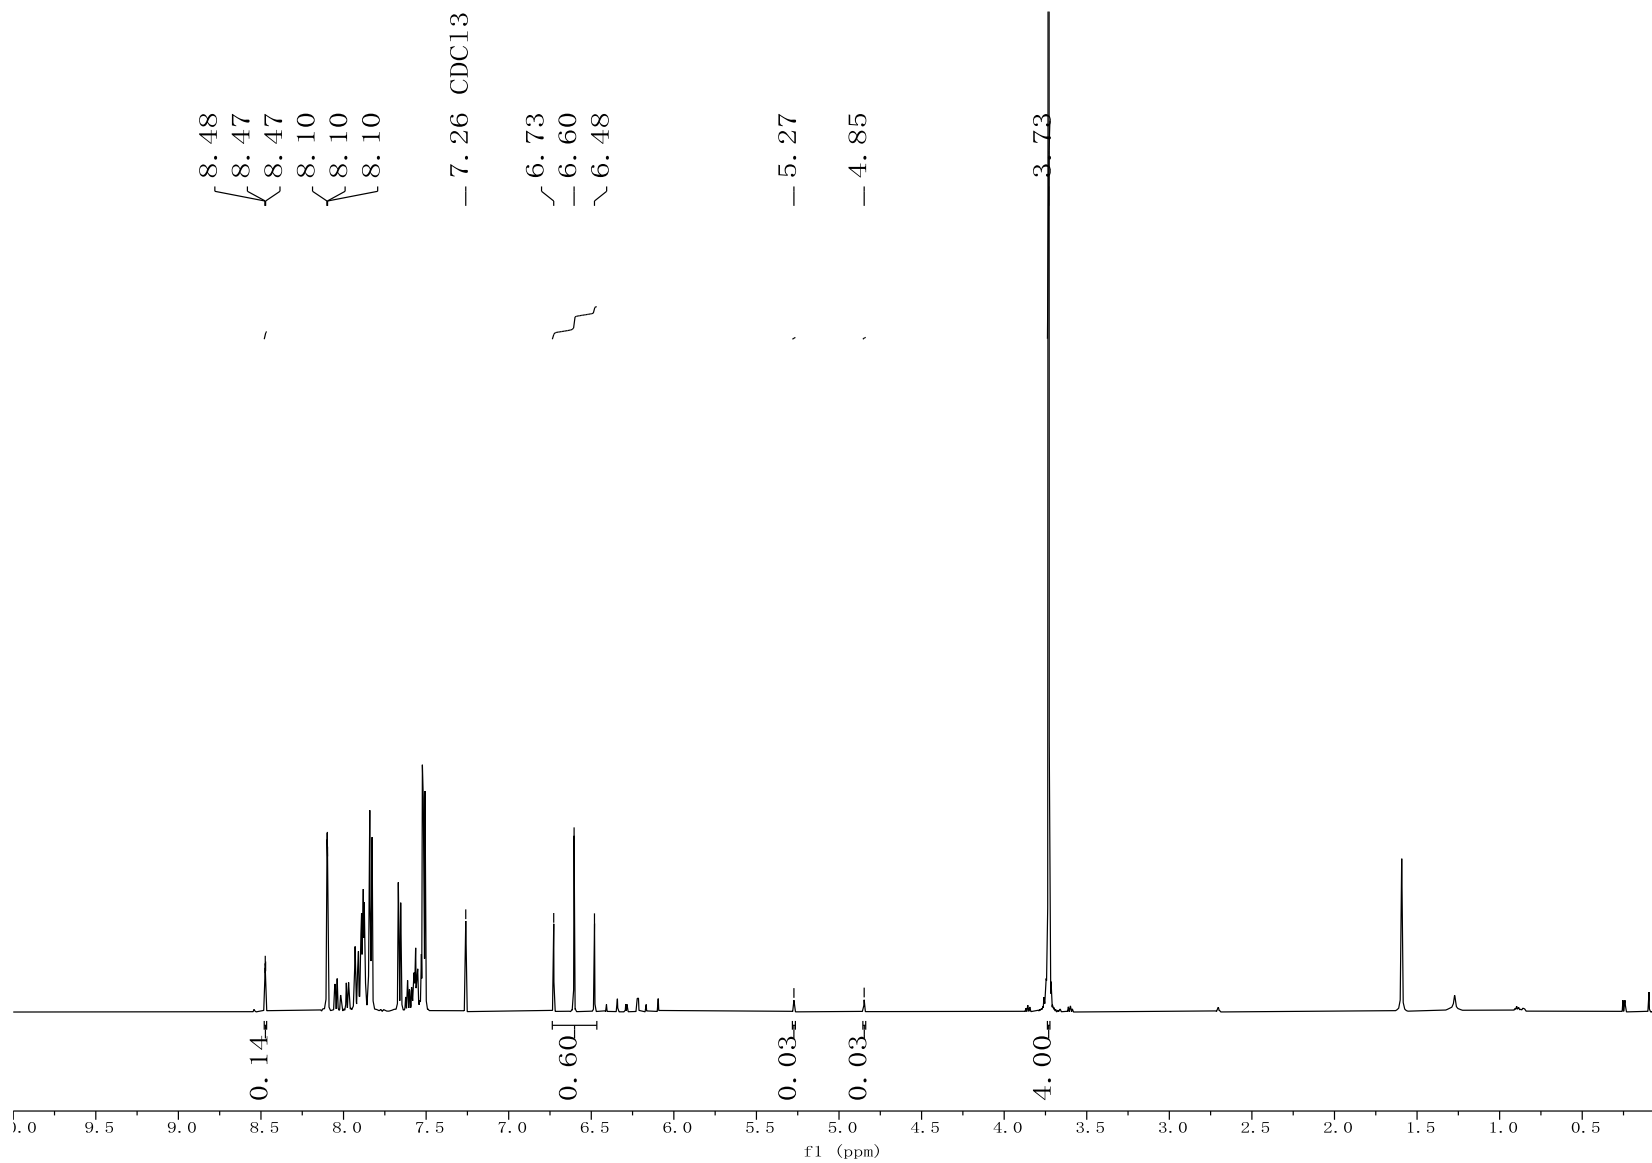

**<sup>19</sup>F NMR of the crude reaction mixture**

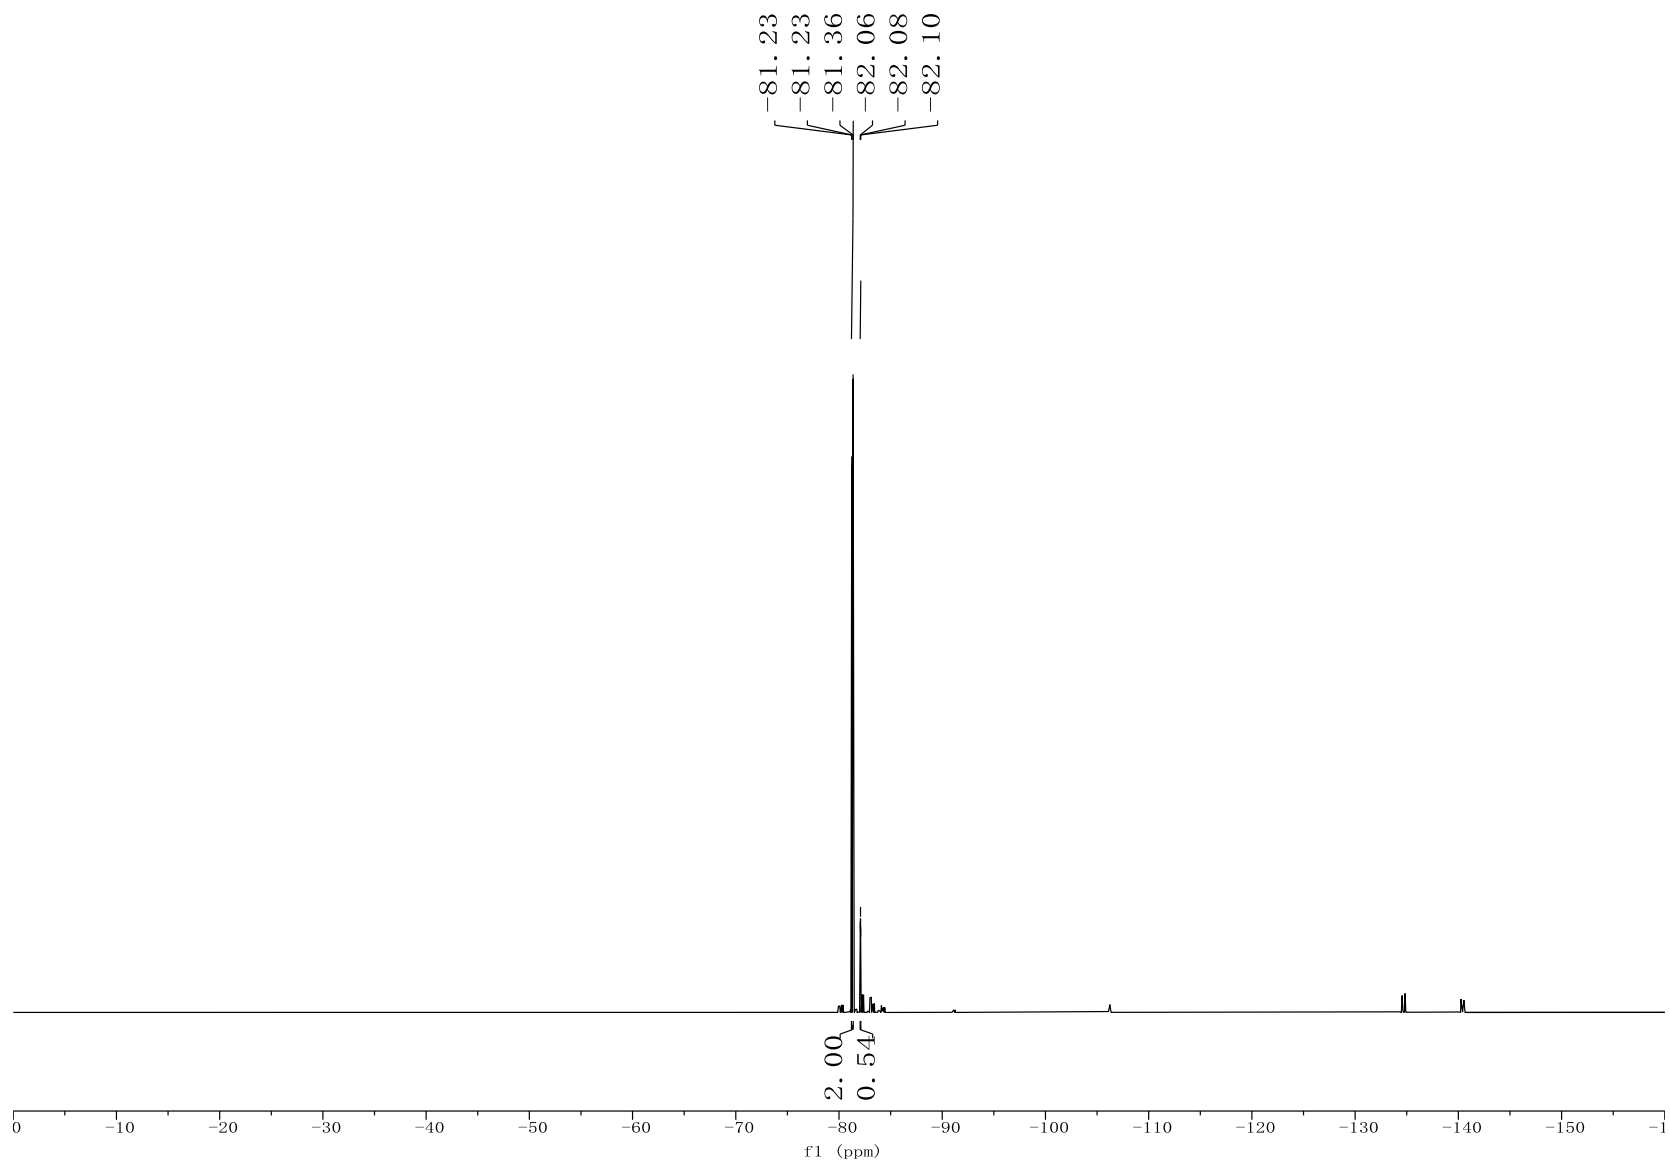

**$^{13}\text{C}\{^1\text{H}\}$  NMR of the crude reaction mixture**

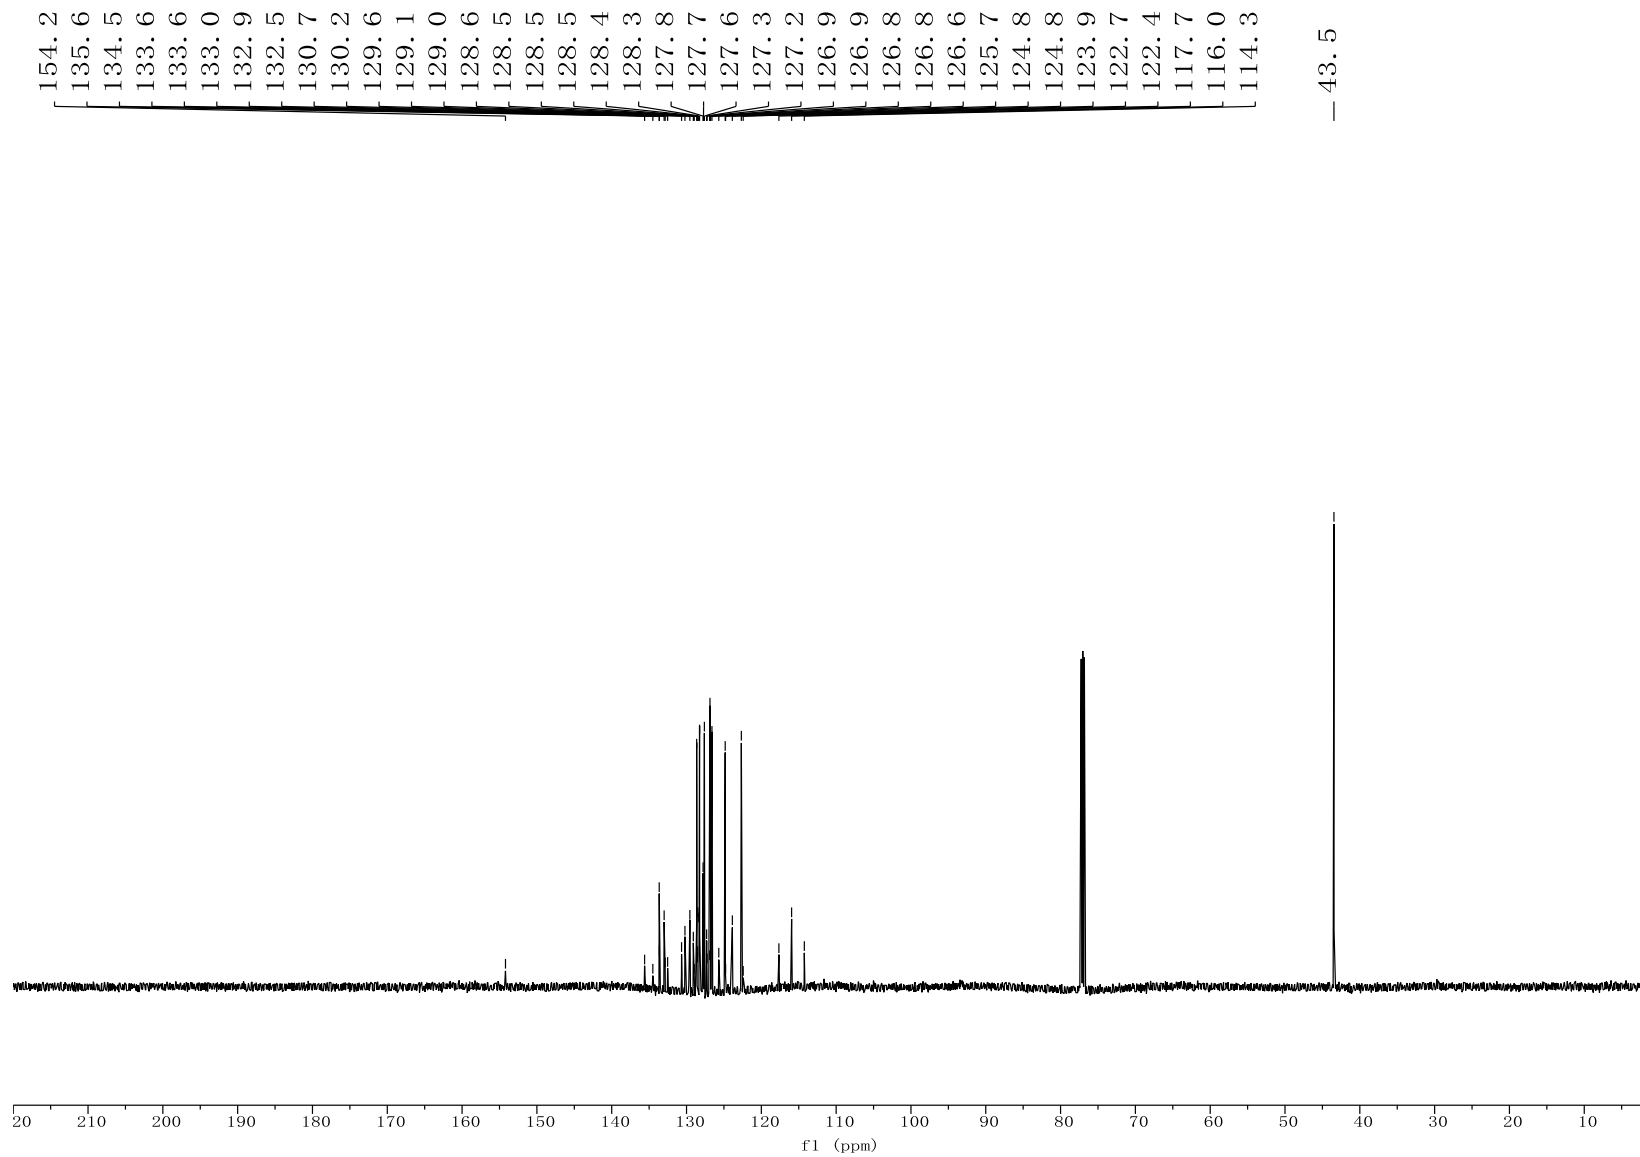



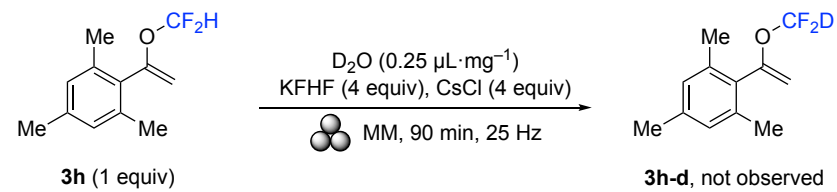

**Scheme S4:** Hydrogen–deuterium exchange of difluoromethyl enol ether **2i**.

**<sup>1</sup>H NMR of the crude reaction mixture**

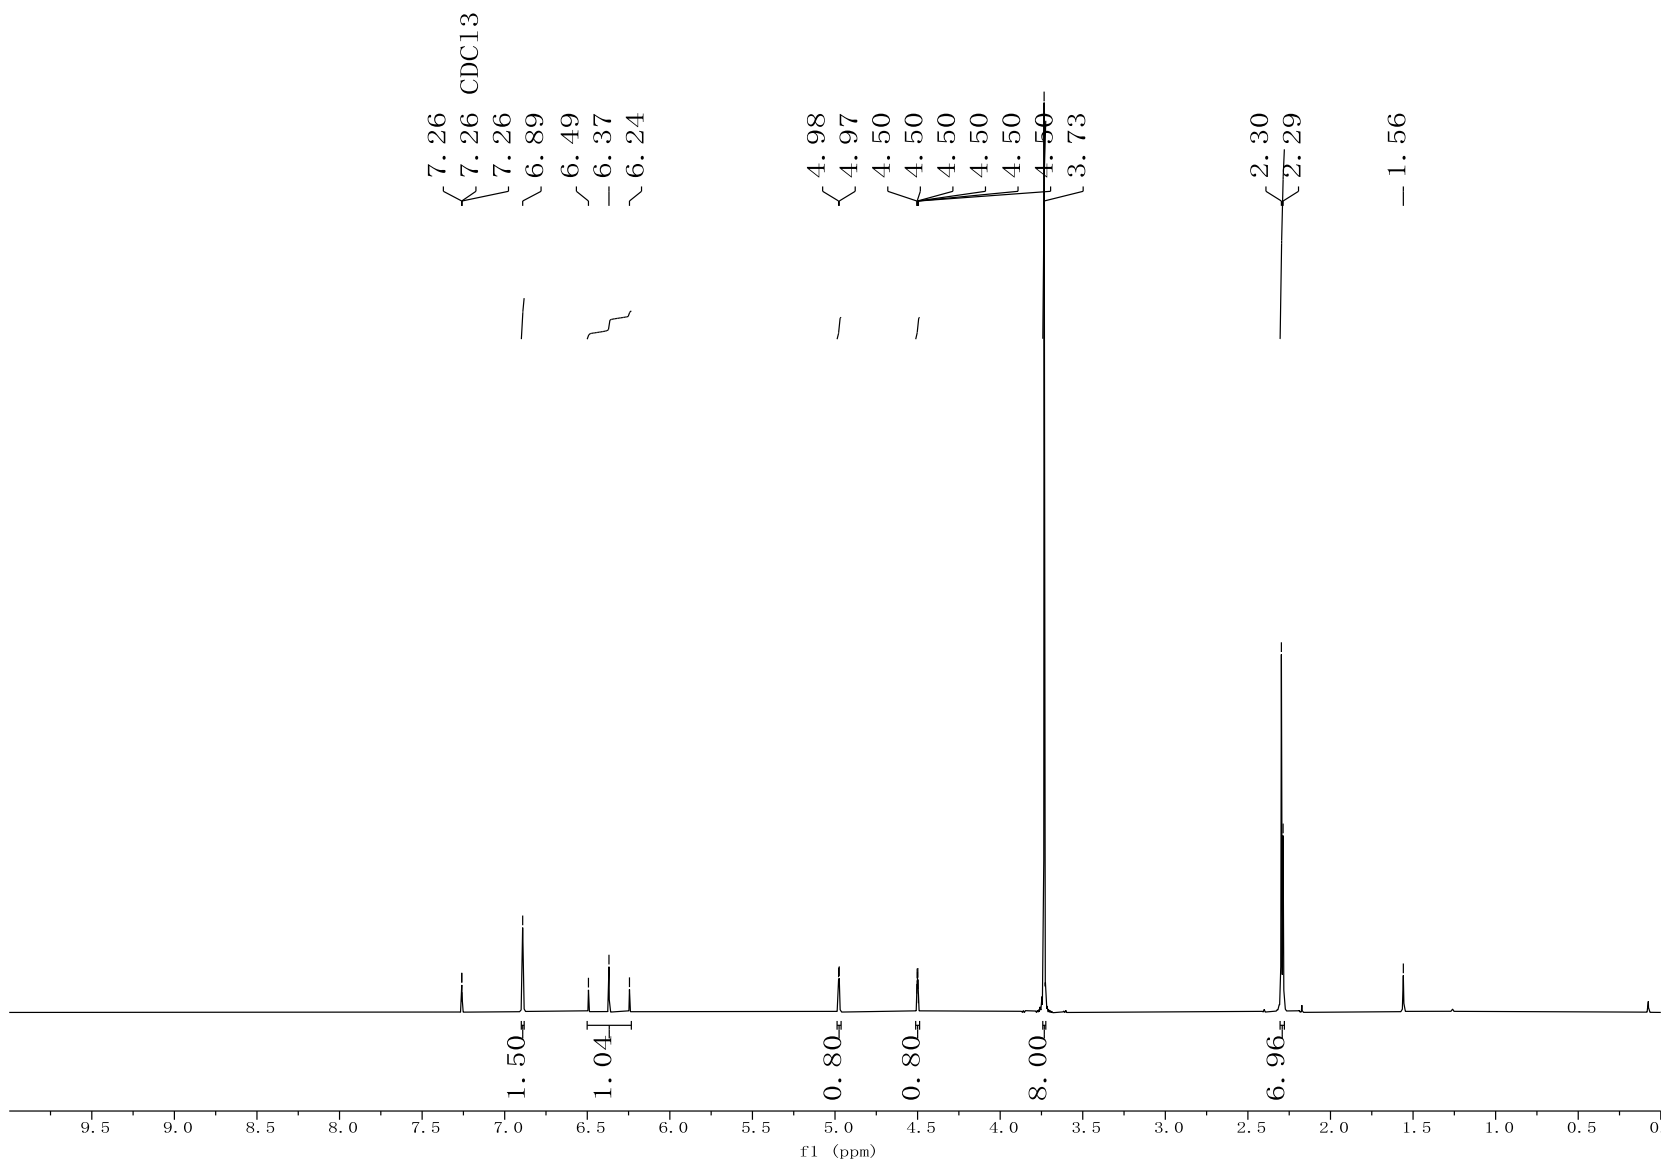

**<sup>19</sup>F NMR of the crude reaction mixture**

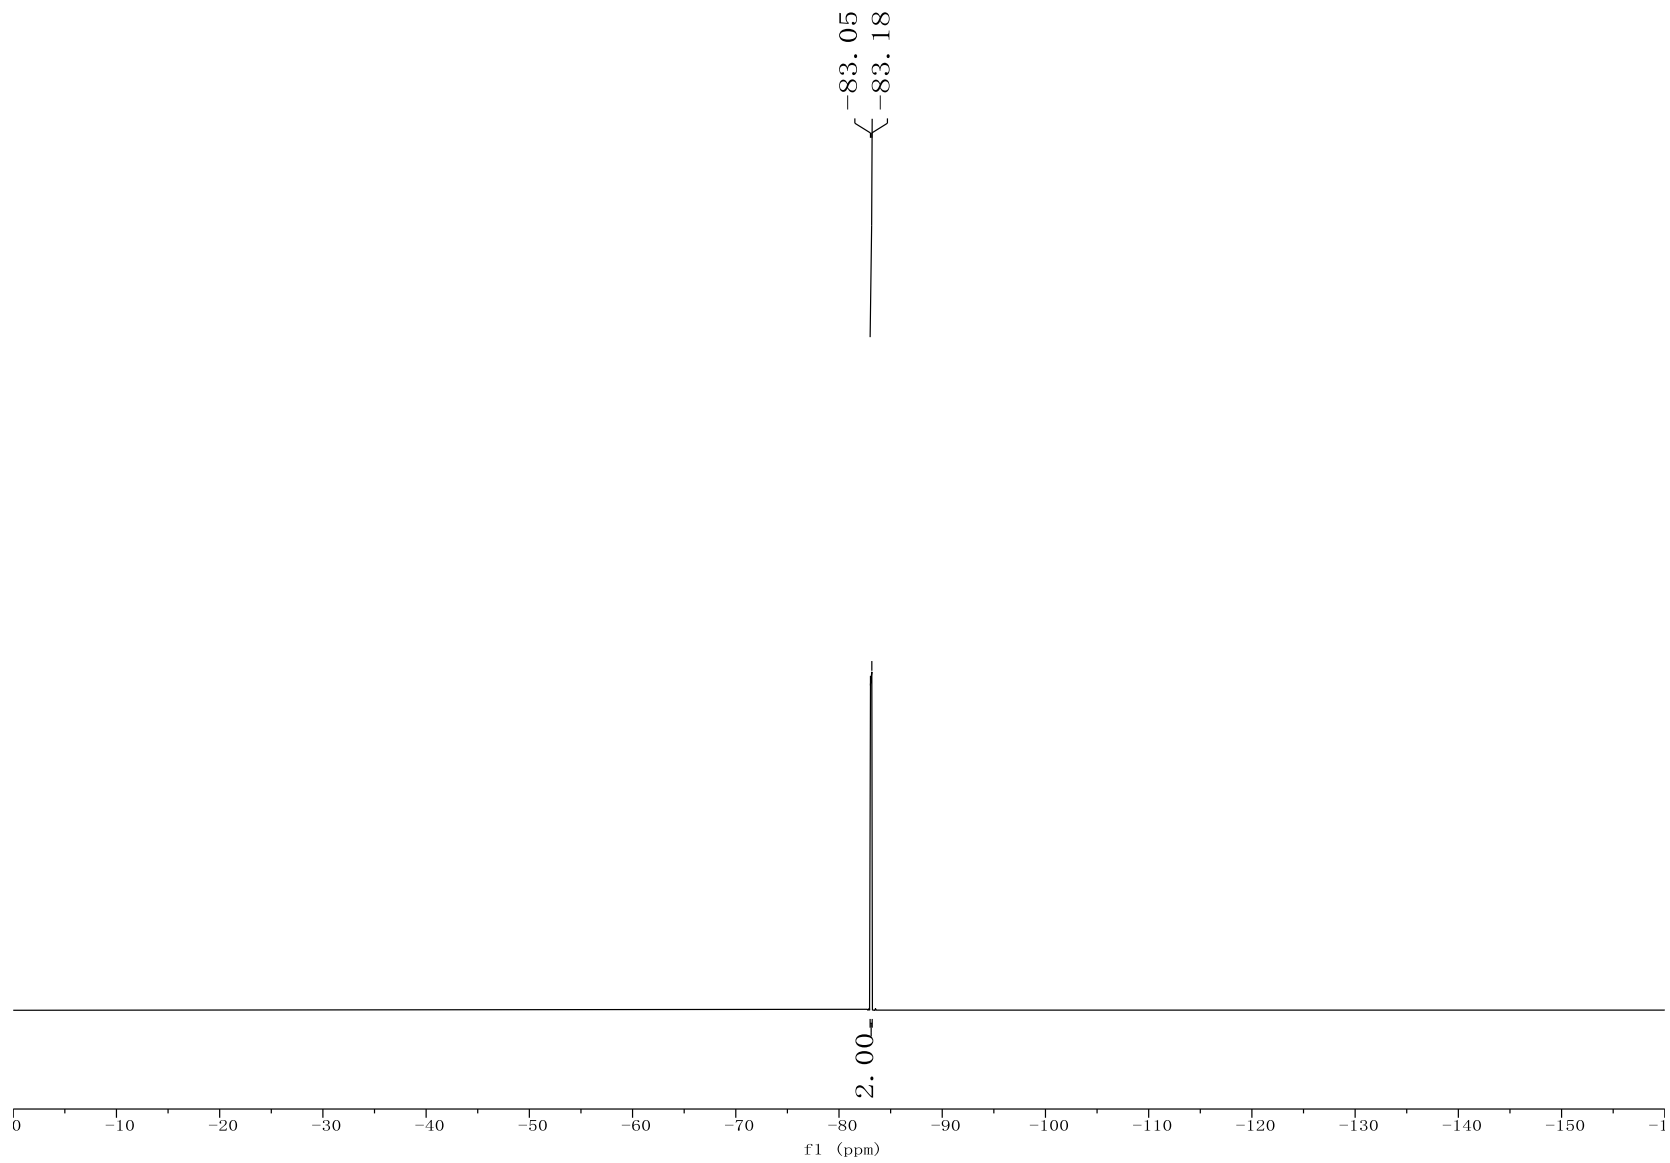

**$^{13}\text{C}\{^1\text{H}\}$  NMR of the crude reaction mixture**

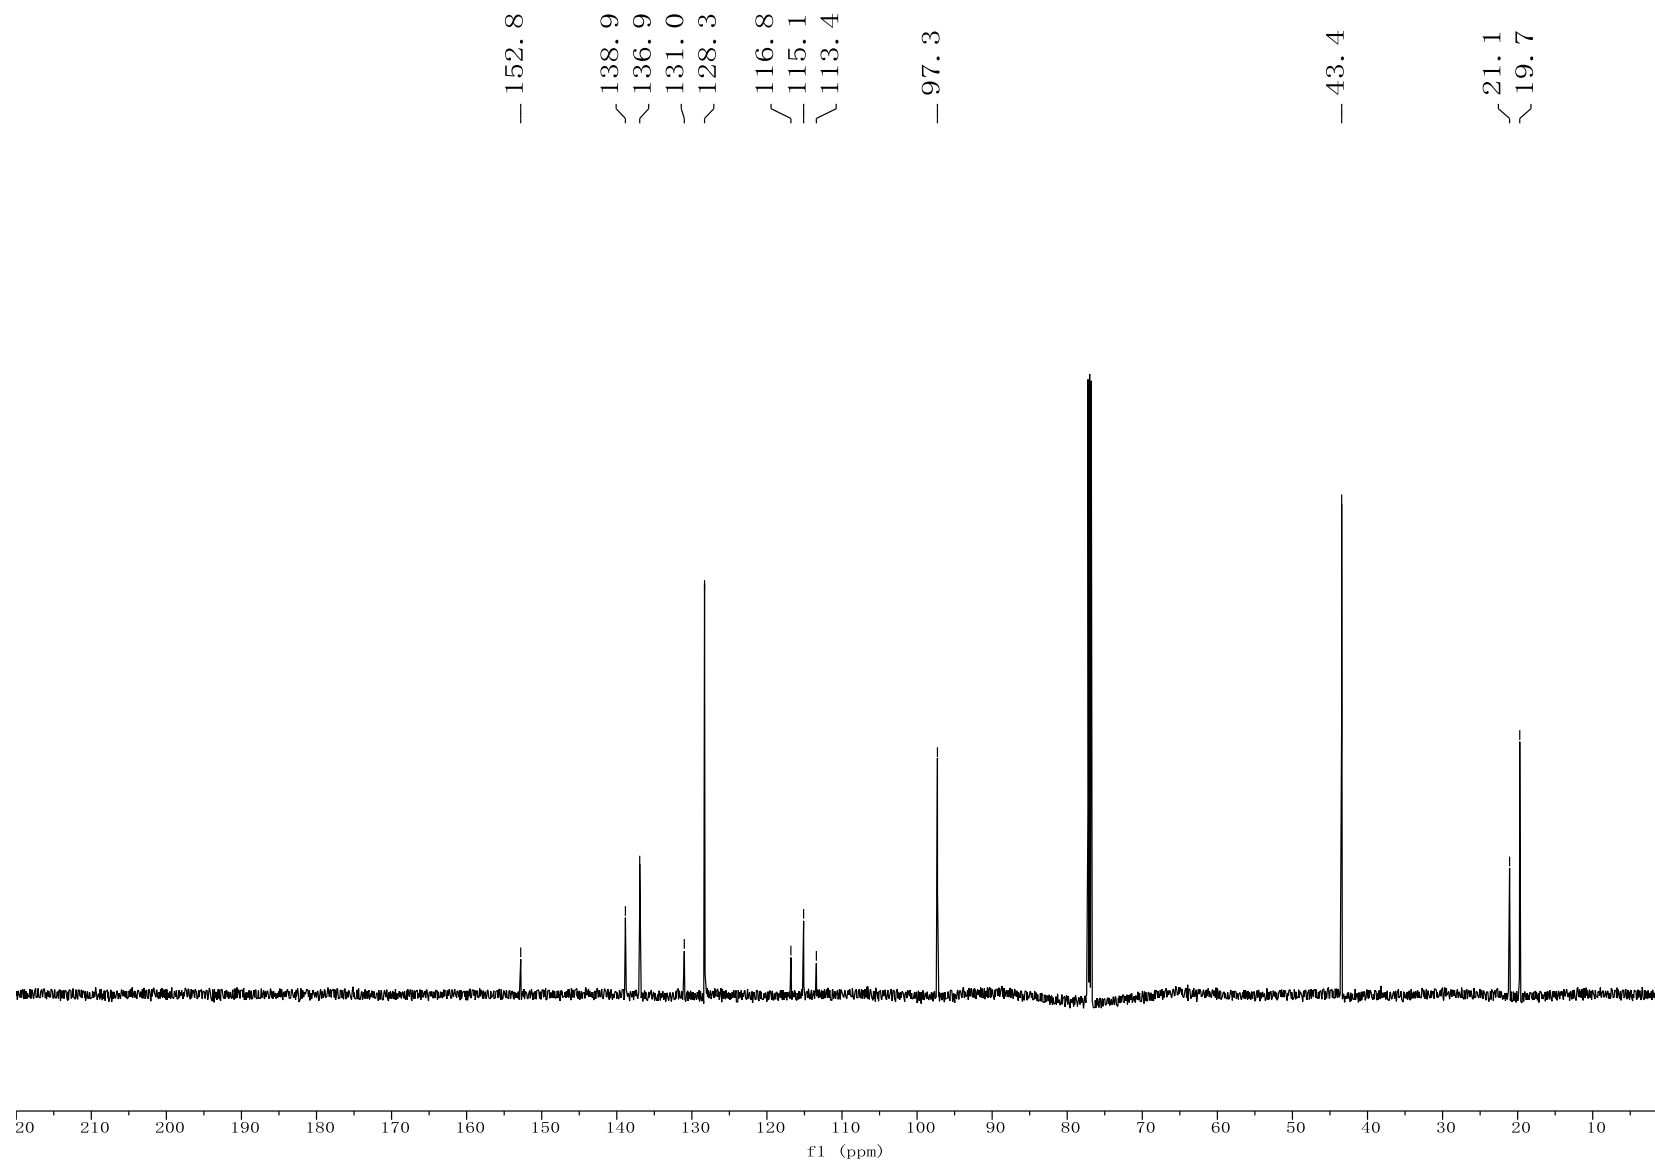

## 8. References

1. Zhang, Q.; Jiang, P.; Wang, K.; Song, G.; Zhu, H. *Dyes Pigments* **2011**, *91*, 89–97.
2. Sambiagio, C.; Munday, R. H.; Marsden, S. P.; Blacker, A. J.; McGowan, P. C. *Chem. Eur. J.* **2014**, *20*, 17606–17615.
3. Cui, C.; Wang, X.; Weiss, R. G. *J. Org. Chem.* **1996**, *61*, 1962–1974.
4. Bugarin, A.; Jones, K. D.; Connell, B. T. *Chem. Commun.* **2010**, *46*, 1715–1717.
5. Darshana, D.; Sureram, S.; Mahidol, C.; Ruchirawat, S.; Kittakoop, P. *Org. Biomol. Chem.* **2021**, *19*, 7390–7402.
6. van Bonn, P.; Ke, J.; Weike, C.; Ward, J. S.; Rissanen, K.; Bolm, C. *CCS Chem.* **2023**, *5*, 1737–1744.
7. Zafrani, Y.; Sod-Moriah, G.; Segall, Y. *Tetrahedron* **2009**, *65*, 5278–5283.
8. Liu, G.-K.; Li, X.; Qin, W.-B.; Peng, X.-S.; Wong, H. N. C.; Zhang, L.; Zhang, X. *Chem. Commun.* **2019**, *55*, 7446–7449.
9. Polley, A.; Bairy, G.; Das, P.; Jana, R. *Adv. Synth. Catal.* **2018**, *360*, 4161–4167.
10. Tian, F.; Kruger, V.; Bautista, O.; Duan, J.-X.; Li, A.-R.; Dolbier, W. R.; Chen, Q.-Y. *Org. Lett.* **2000**, *2*, 563–564.
11. Mehta, V. P.; Greaney, M. F. *Org. Lett.* **2013**, *15*, 5036–5039.
12. Xie, Q.; Ni, C.; Zhang, R.; Li, L.; Rong, J.; Hu, J. *Angew. Chem., Int. Ed.* **2017**, *56*, 3206–3210.
13. Fuchibe, K.; Koseki, Y.; Sasagawa, H.; Ichikawa, J. *Chem. Lett.* **2011**, *40*, 1189–1191.
14. Liu, G.-K.; Li, X.; Qin, W.-B.; Lin, W.-F.; Lin, L.-T.; Chen, J.-Y.; Liu, J.-J. *Chin. Chem. Lett.* **2019**, *30*, 1515–1518.

## 9. NMR spectra

$^1\text{H}$  NMR of the crude reaction mixture of 1-[1-(difluoromethoxy)vinyl]-4-methylbenzene (3a)

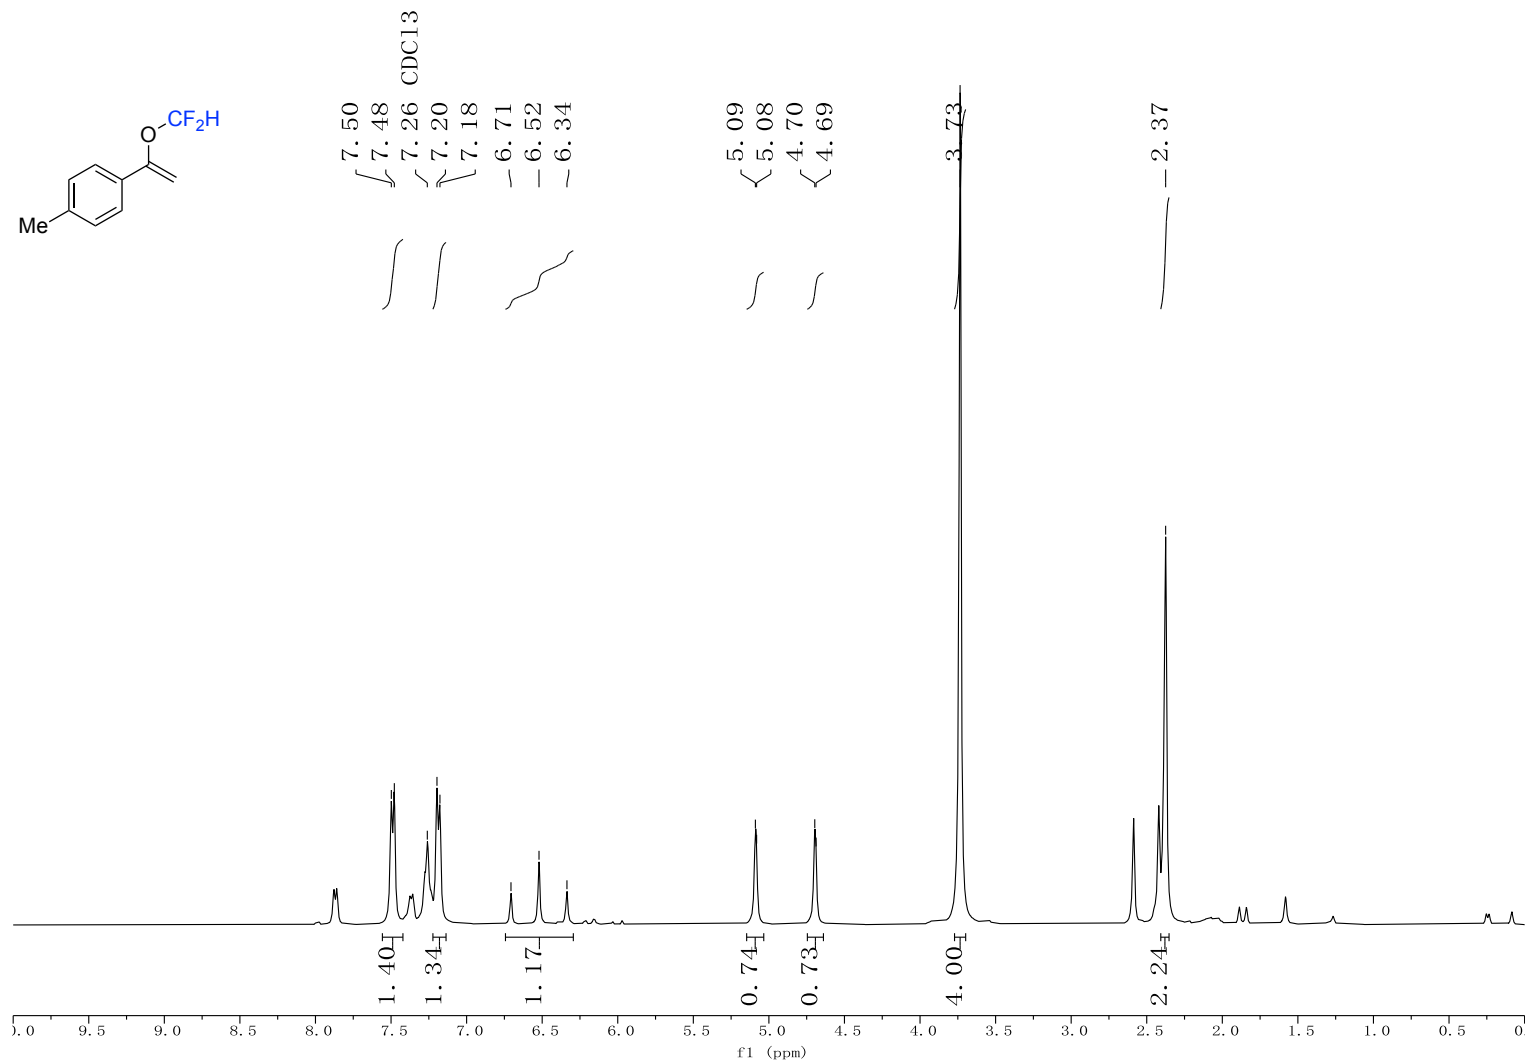

**<sup>19</sup>F NMR of the crude reaction mixture of 1-[1-(difluoromethoxy)vinyl]-4-methylbenzene (3a)**

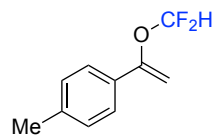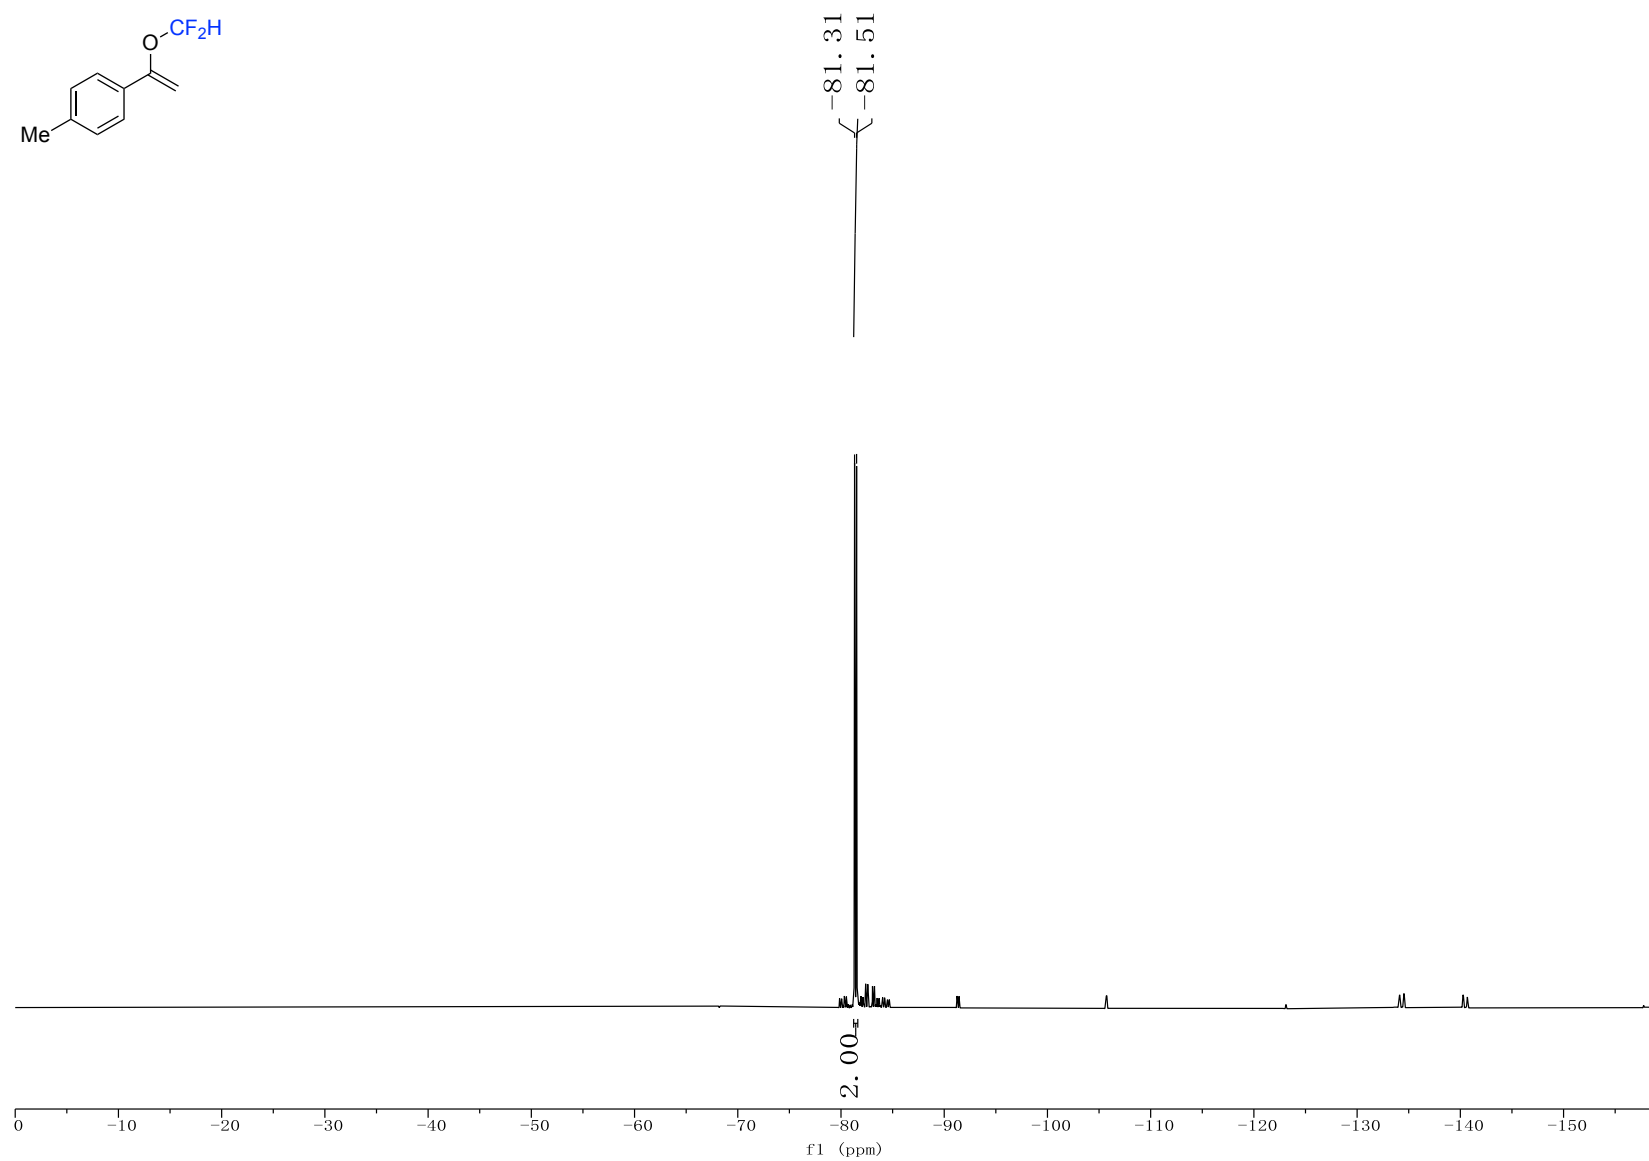

**$^{13}\text{C}\{^1\text{H}\}$  NMR of the crude reaction mixture of 1-[1-(difluoromethoxy)vinyl]-4-methylbenzene (3a)**

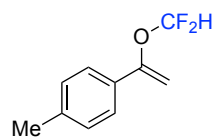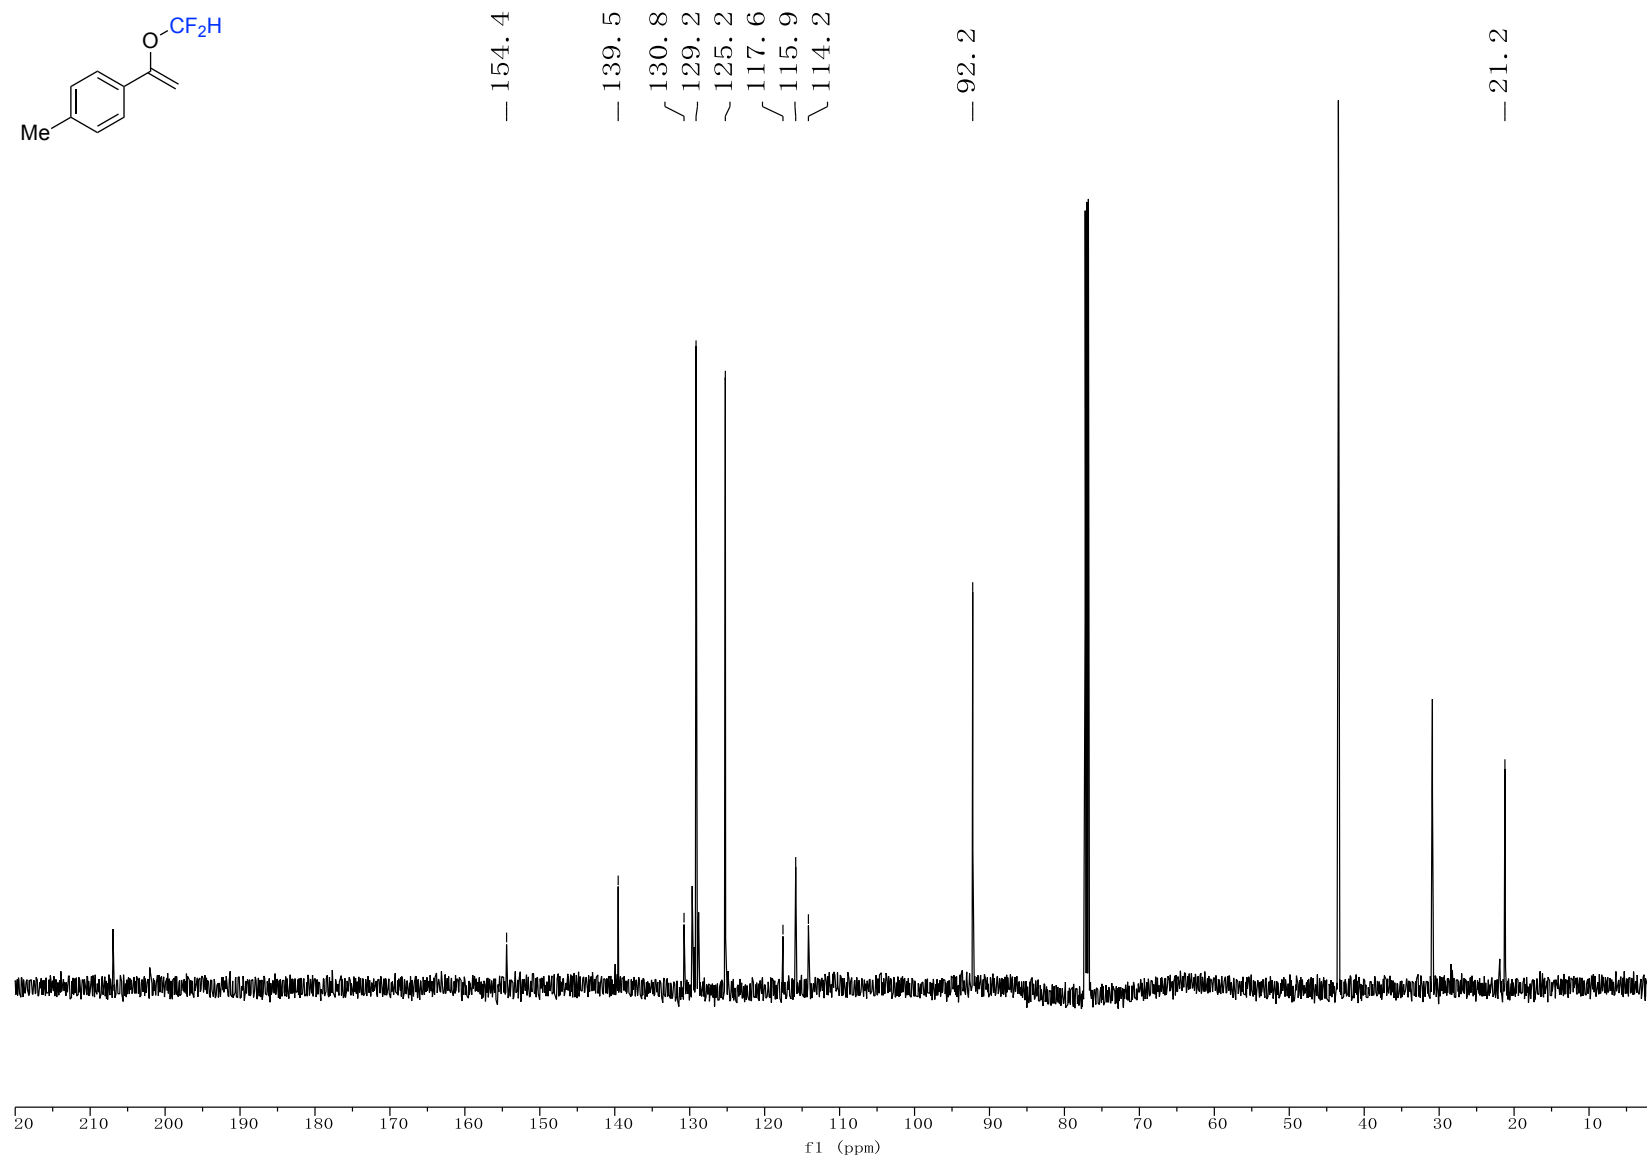



**<sup>1</sup>H NMR of the crude reaction mixture of [1-(difluoromethoxy)vinyl]benzene (3b)**

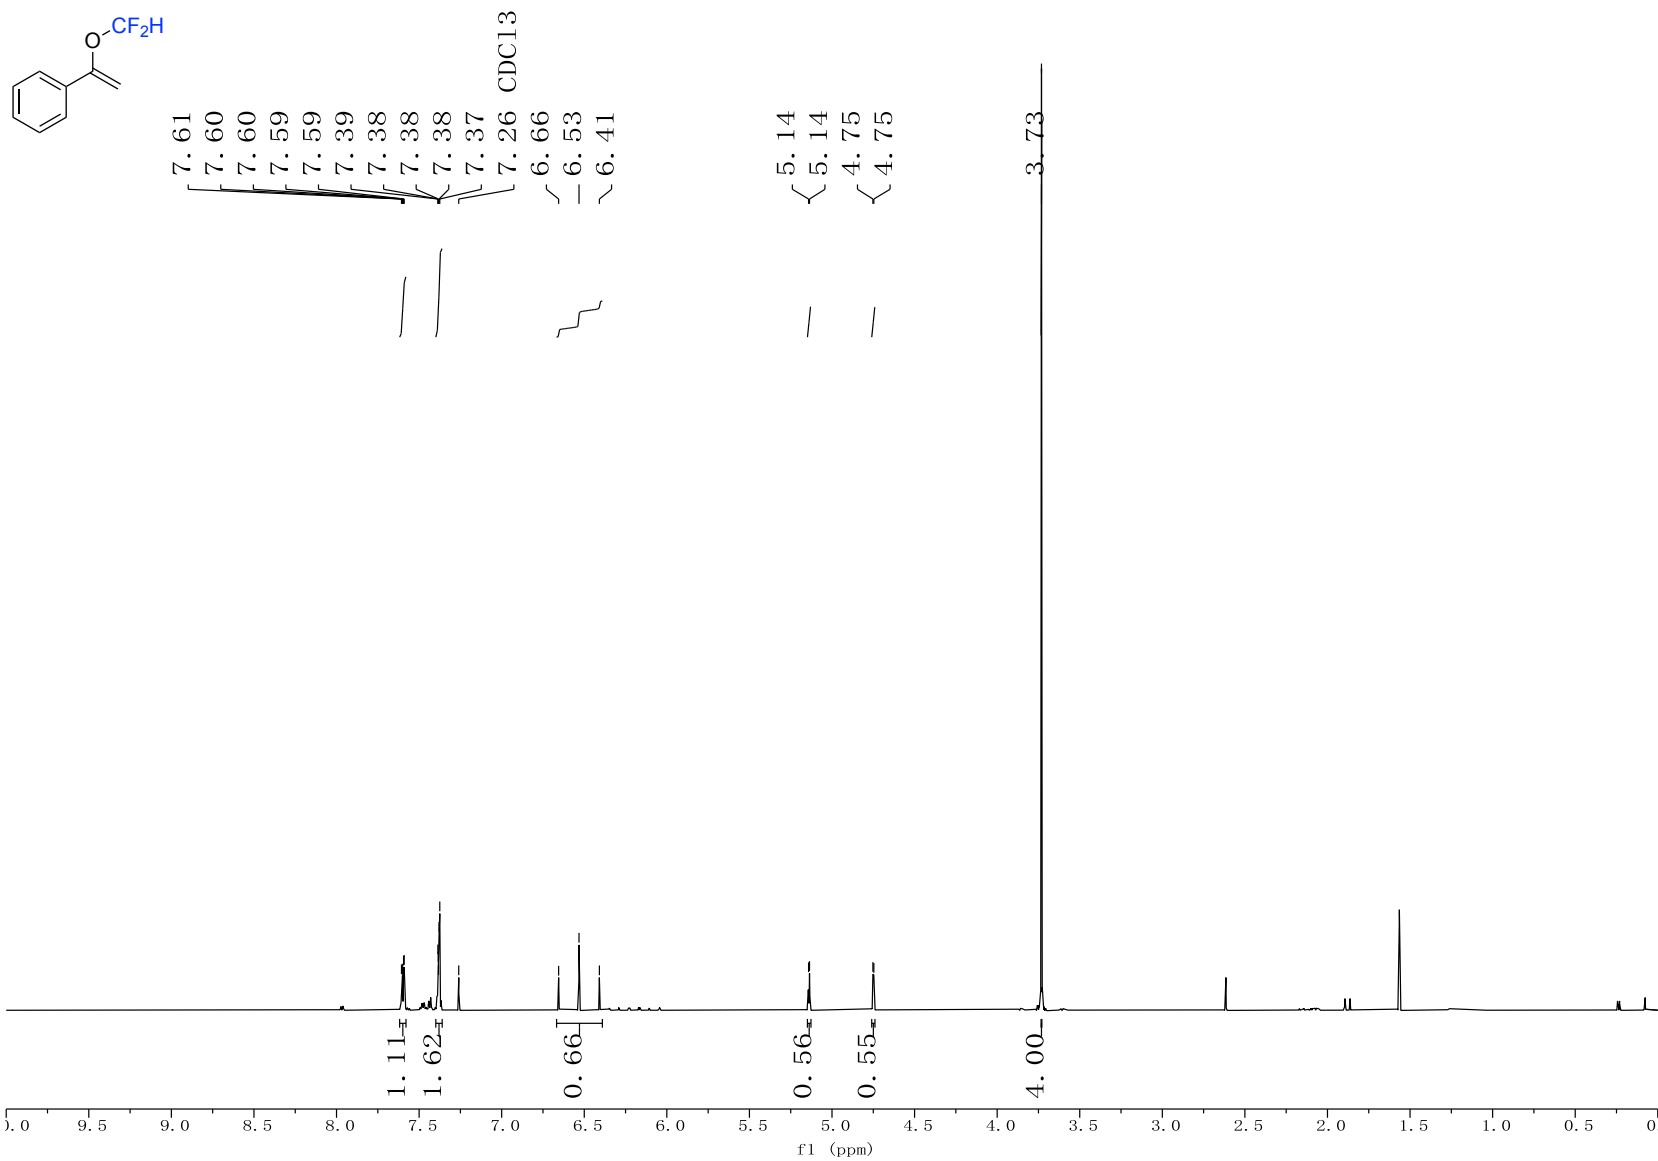

**<sup>19</sup>F NMR of the crude reaction mixture of [1-(difluoromethoxy)vinyl]benzene (3b)**

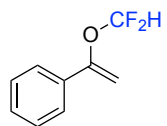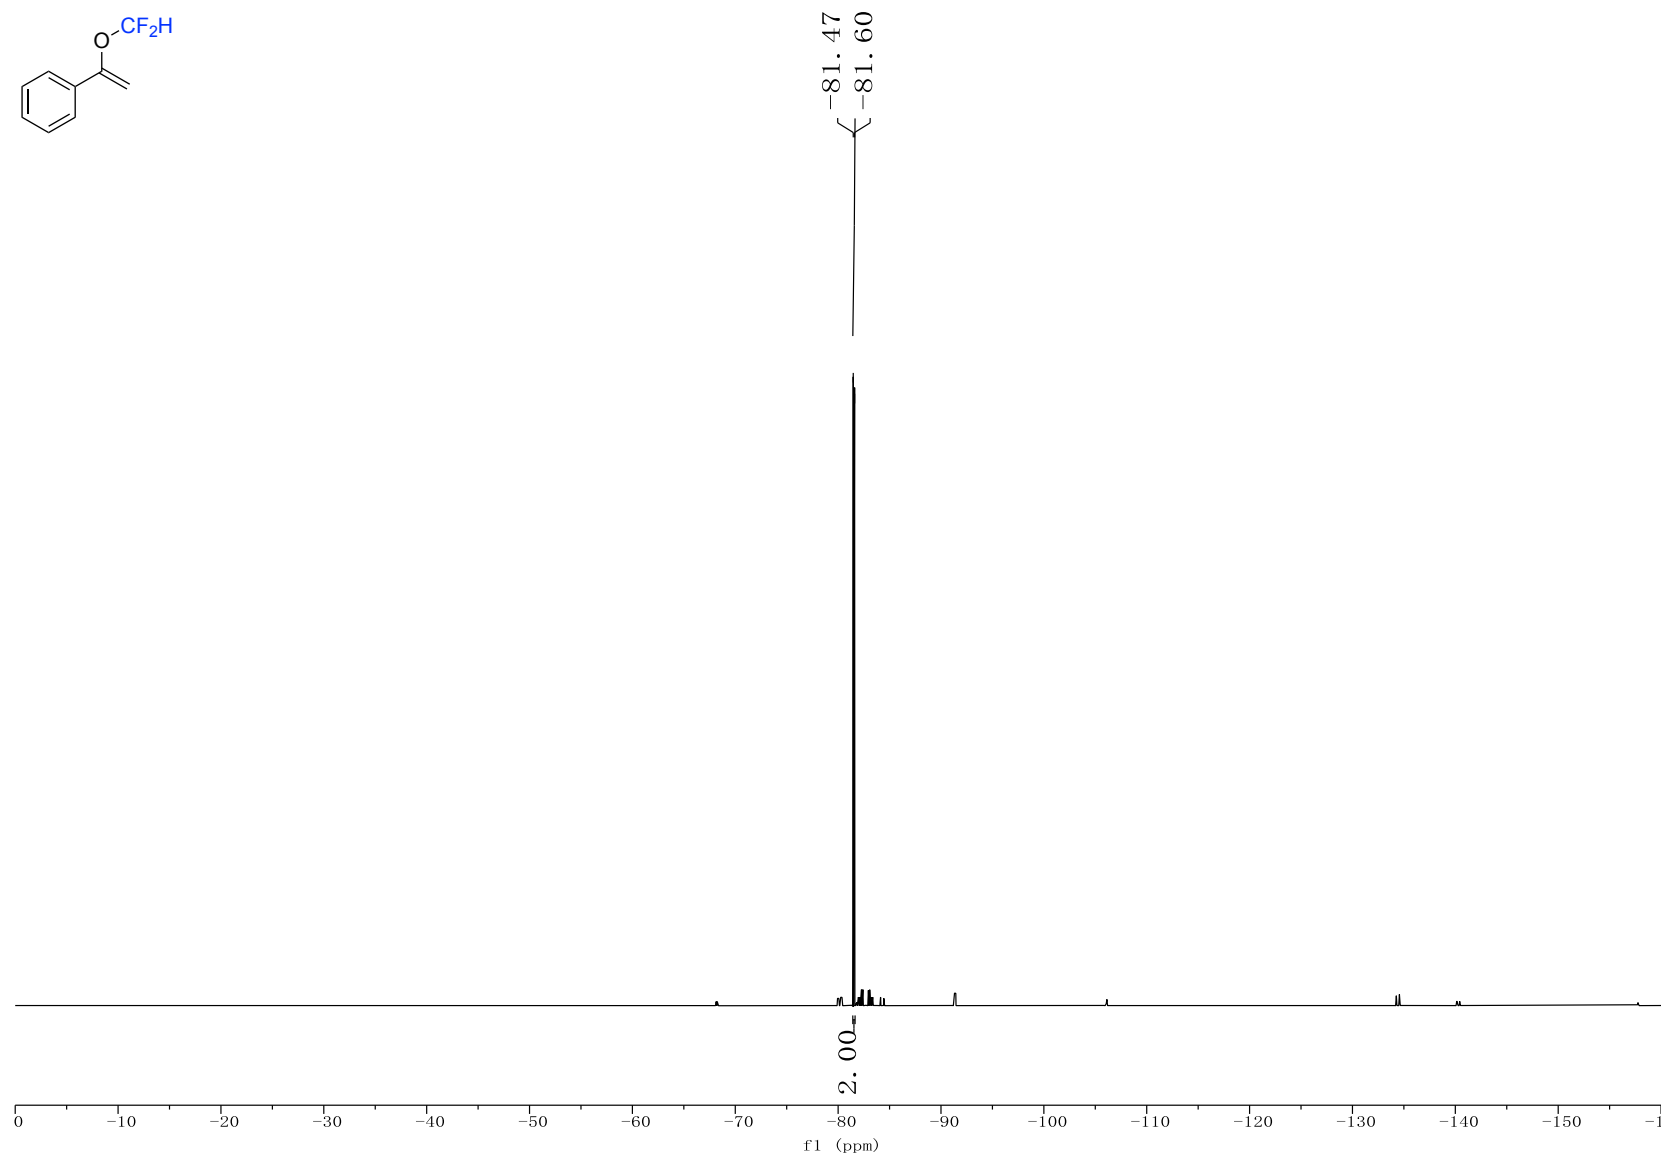

**$^{13}\text{C}\{^1\text{H}\}$  NMR of the crude reaction mixture of [1-(difluoromethoxy)vinyl]benzene (3b)**

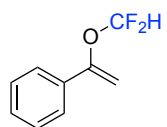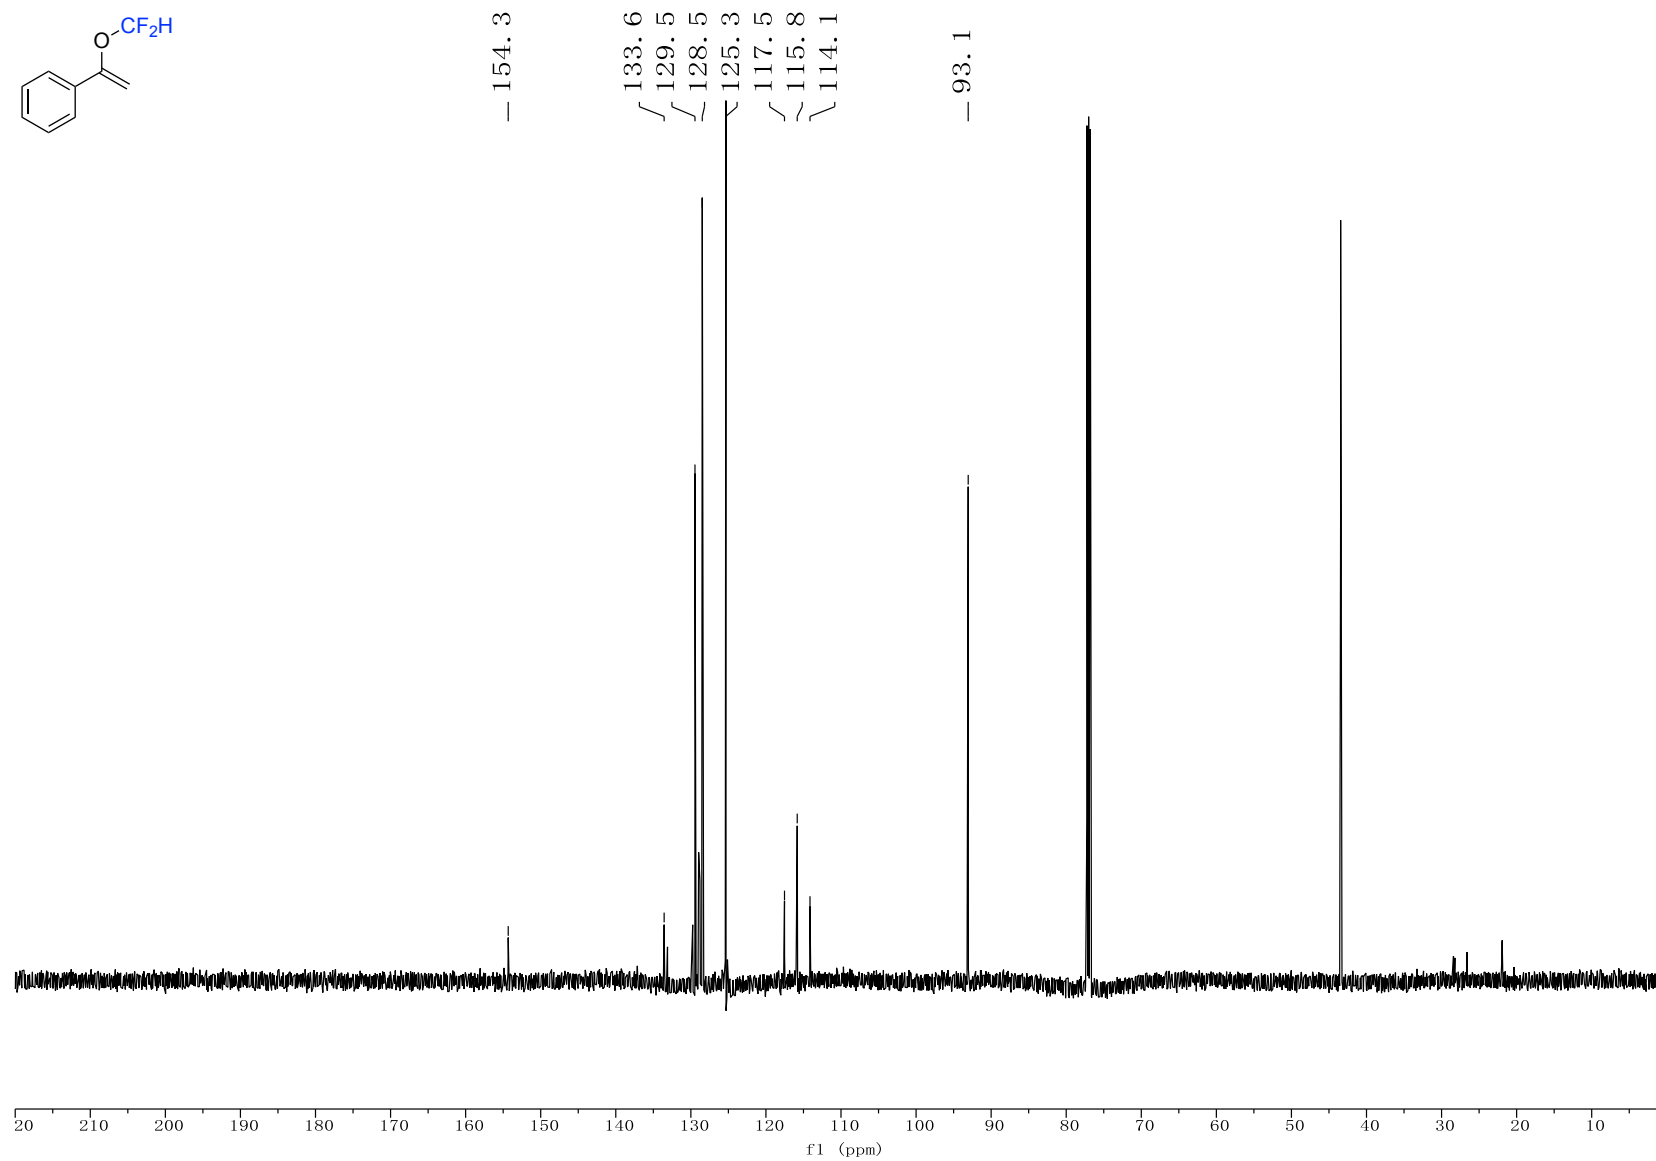

**<sup>1</sup>H NMR of 1-chloro-4-[1-(difluoromethoxy)vinyl]benzene (3c)**

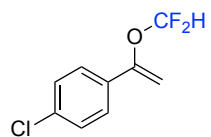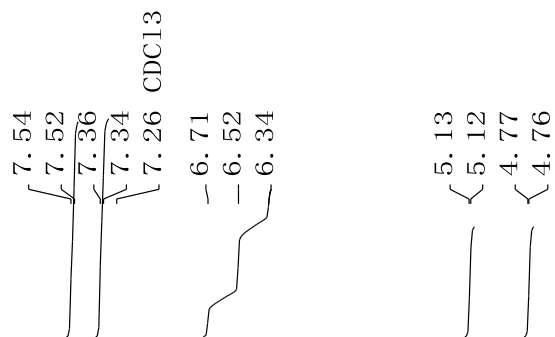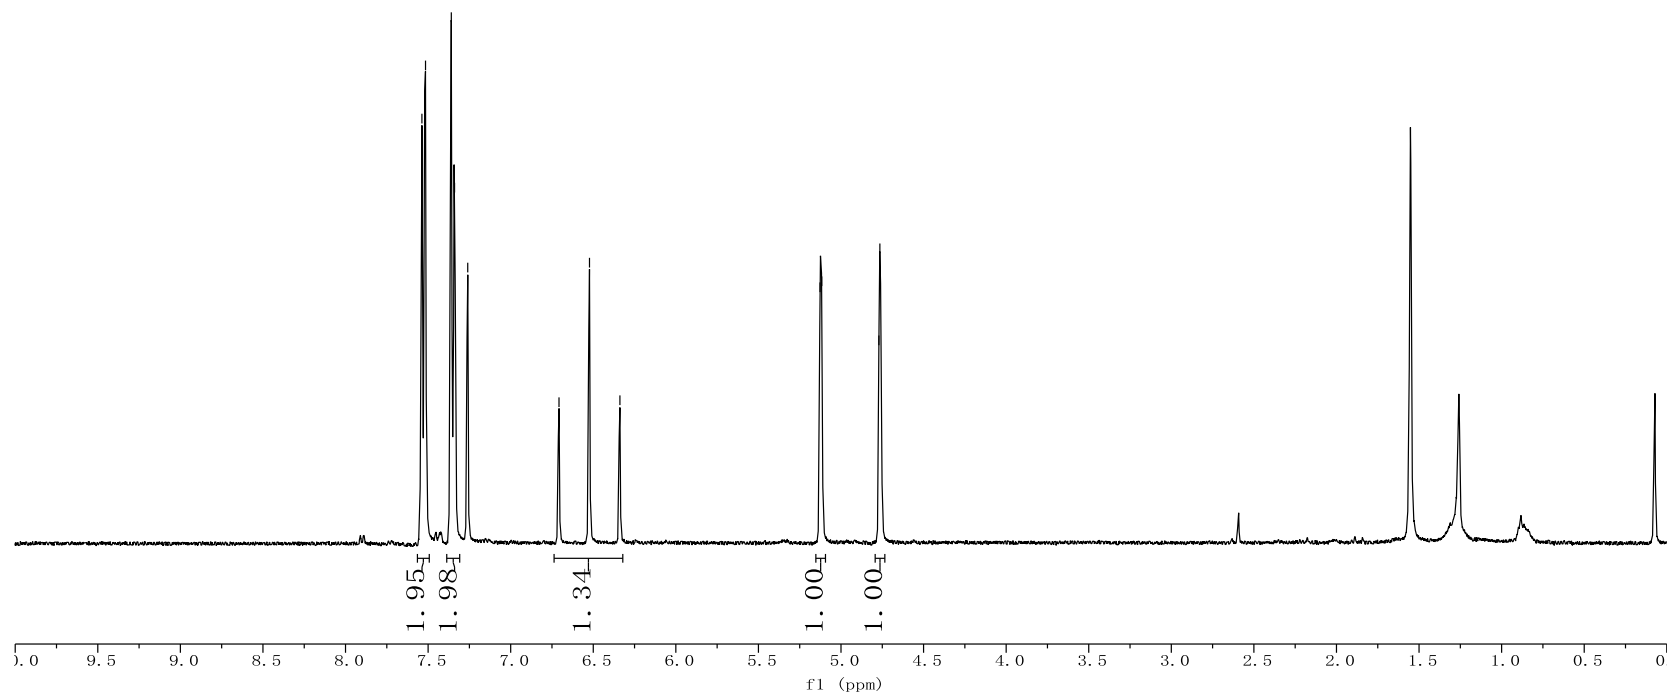

**<sup>19</sup>F NMR of 1-chloro-4-[1-(difluoromethoxy)vinyl]benzene (3c)**

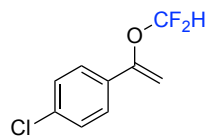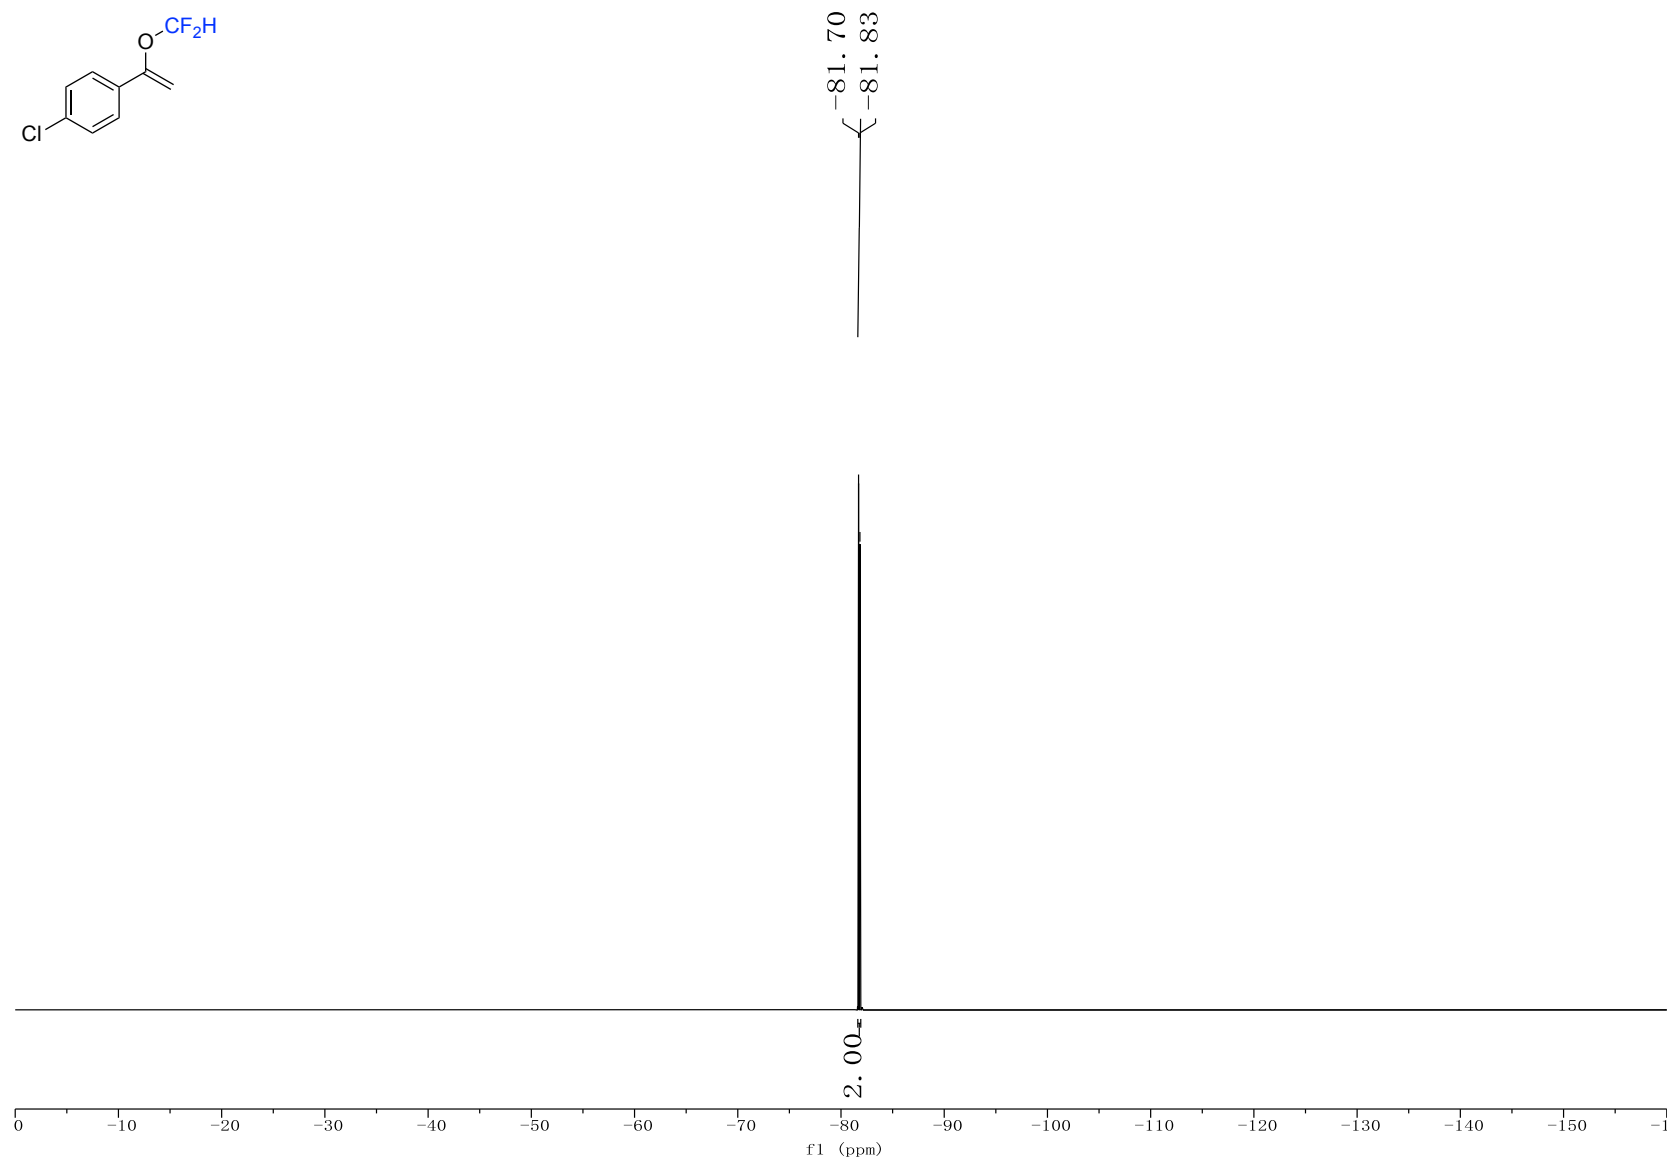

<sup>13</sup>C{<sup>1</sup>H} NMR of 1-chloro-4-[1-(difluoromethoxy)vinyl]benzene (3c)

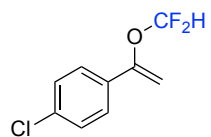

— 153.3  
/ 135.4  
/ 132.1  
— 128.7  
/ 126.6  
/ 118.2  
— 115.7  
/ 113.1  
— 93.3

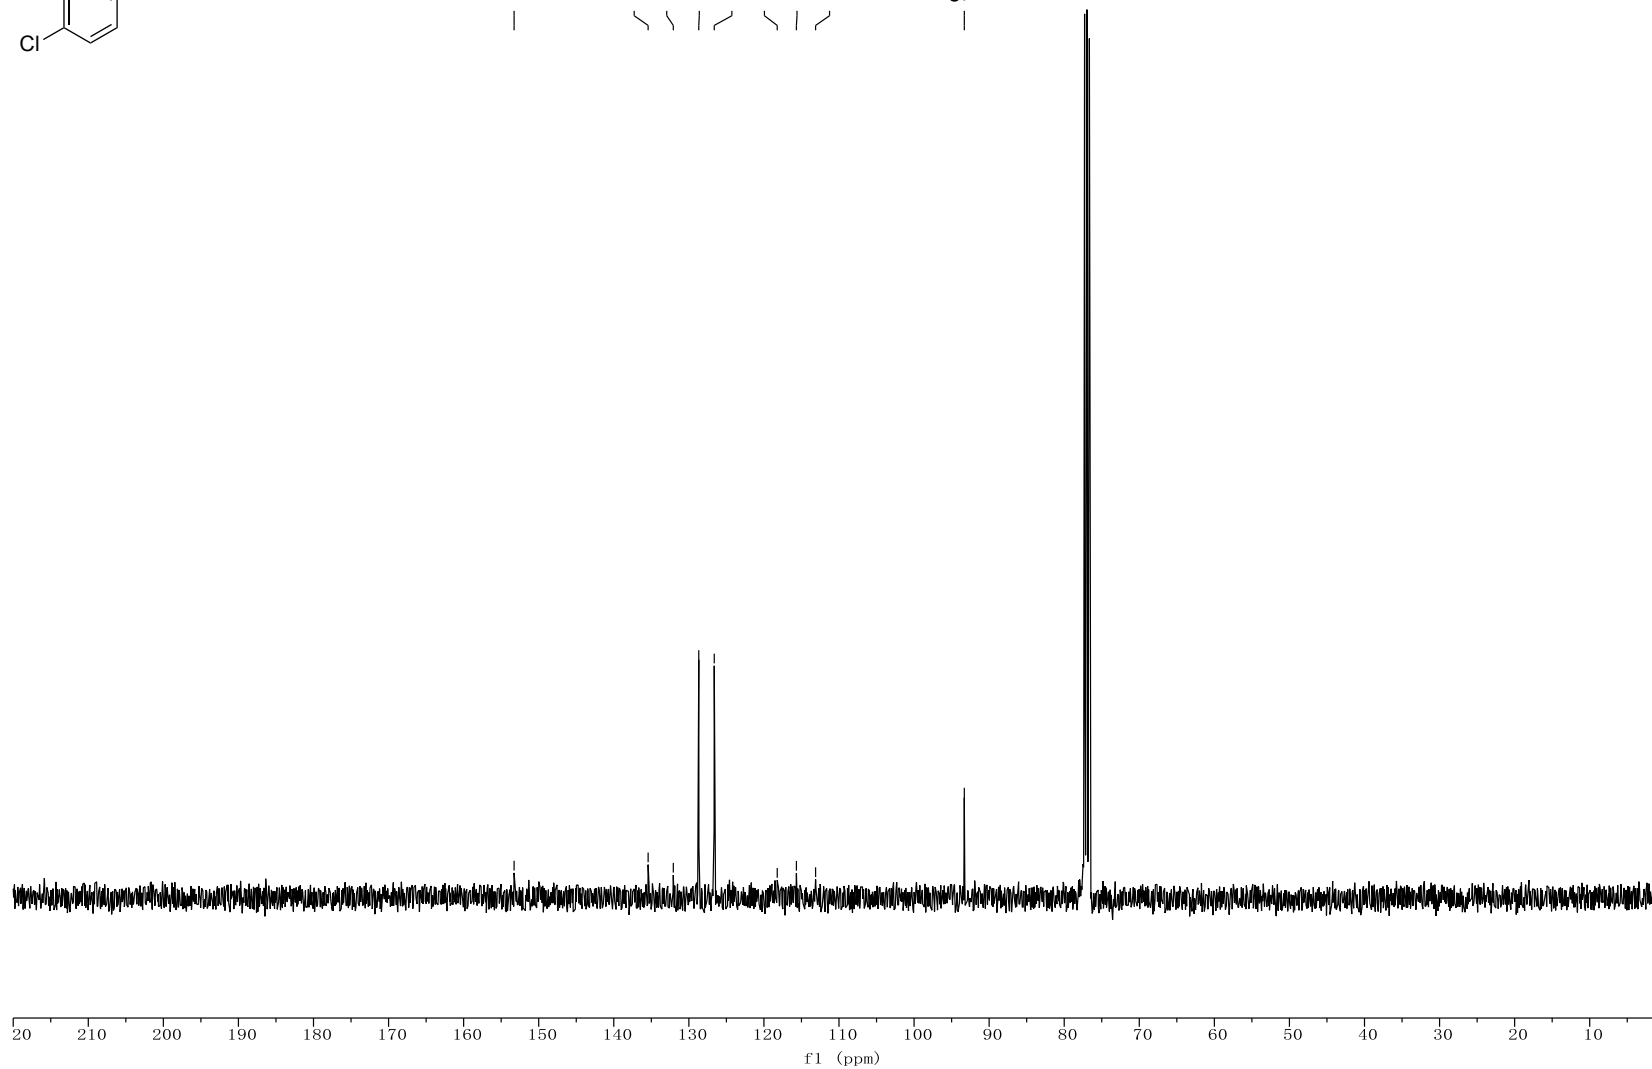

**<sup>1</sup>H NMR of 1-bromo-4-[1-(difluoromethoxy)vinyl]benzene (3d)**

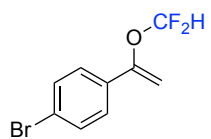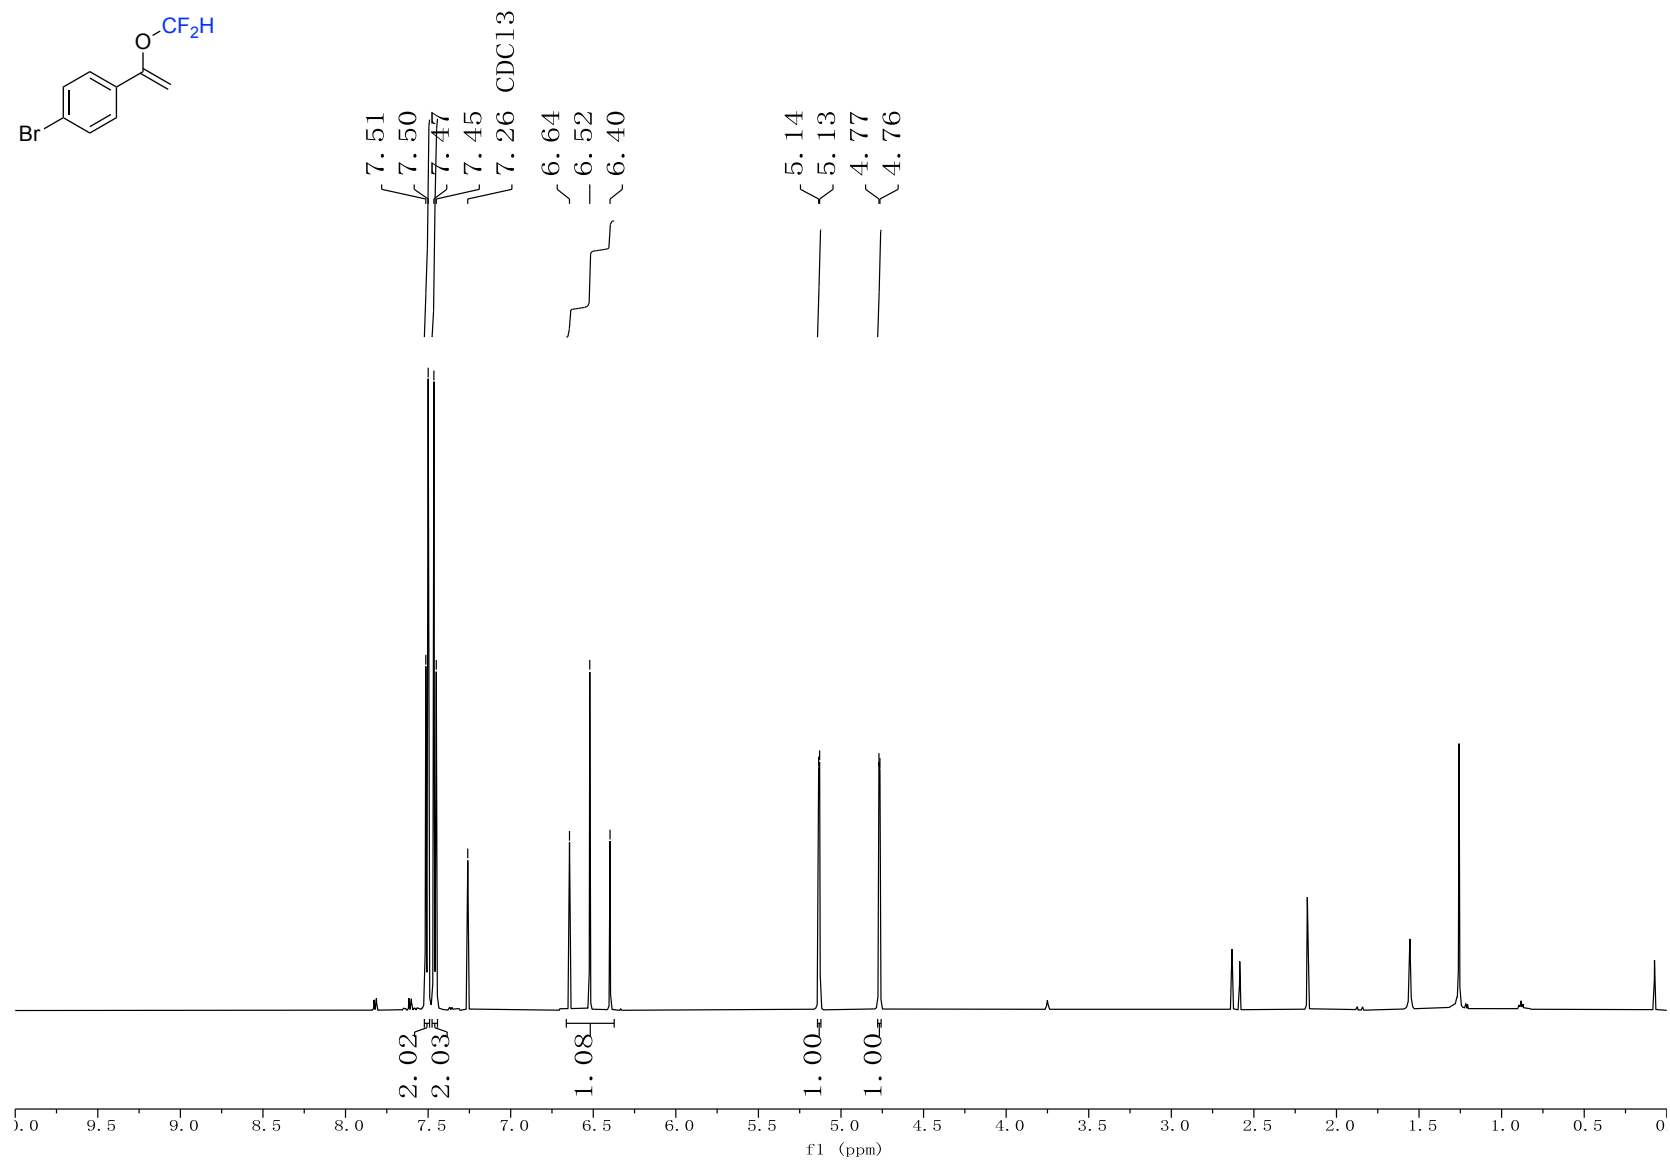

**<sup>19</sup>F NMR of 1-bromo-4-[1-(difluoromethoxy)vinyl]benzene (3d)**

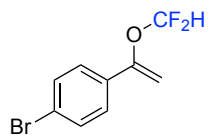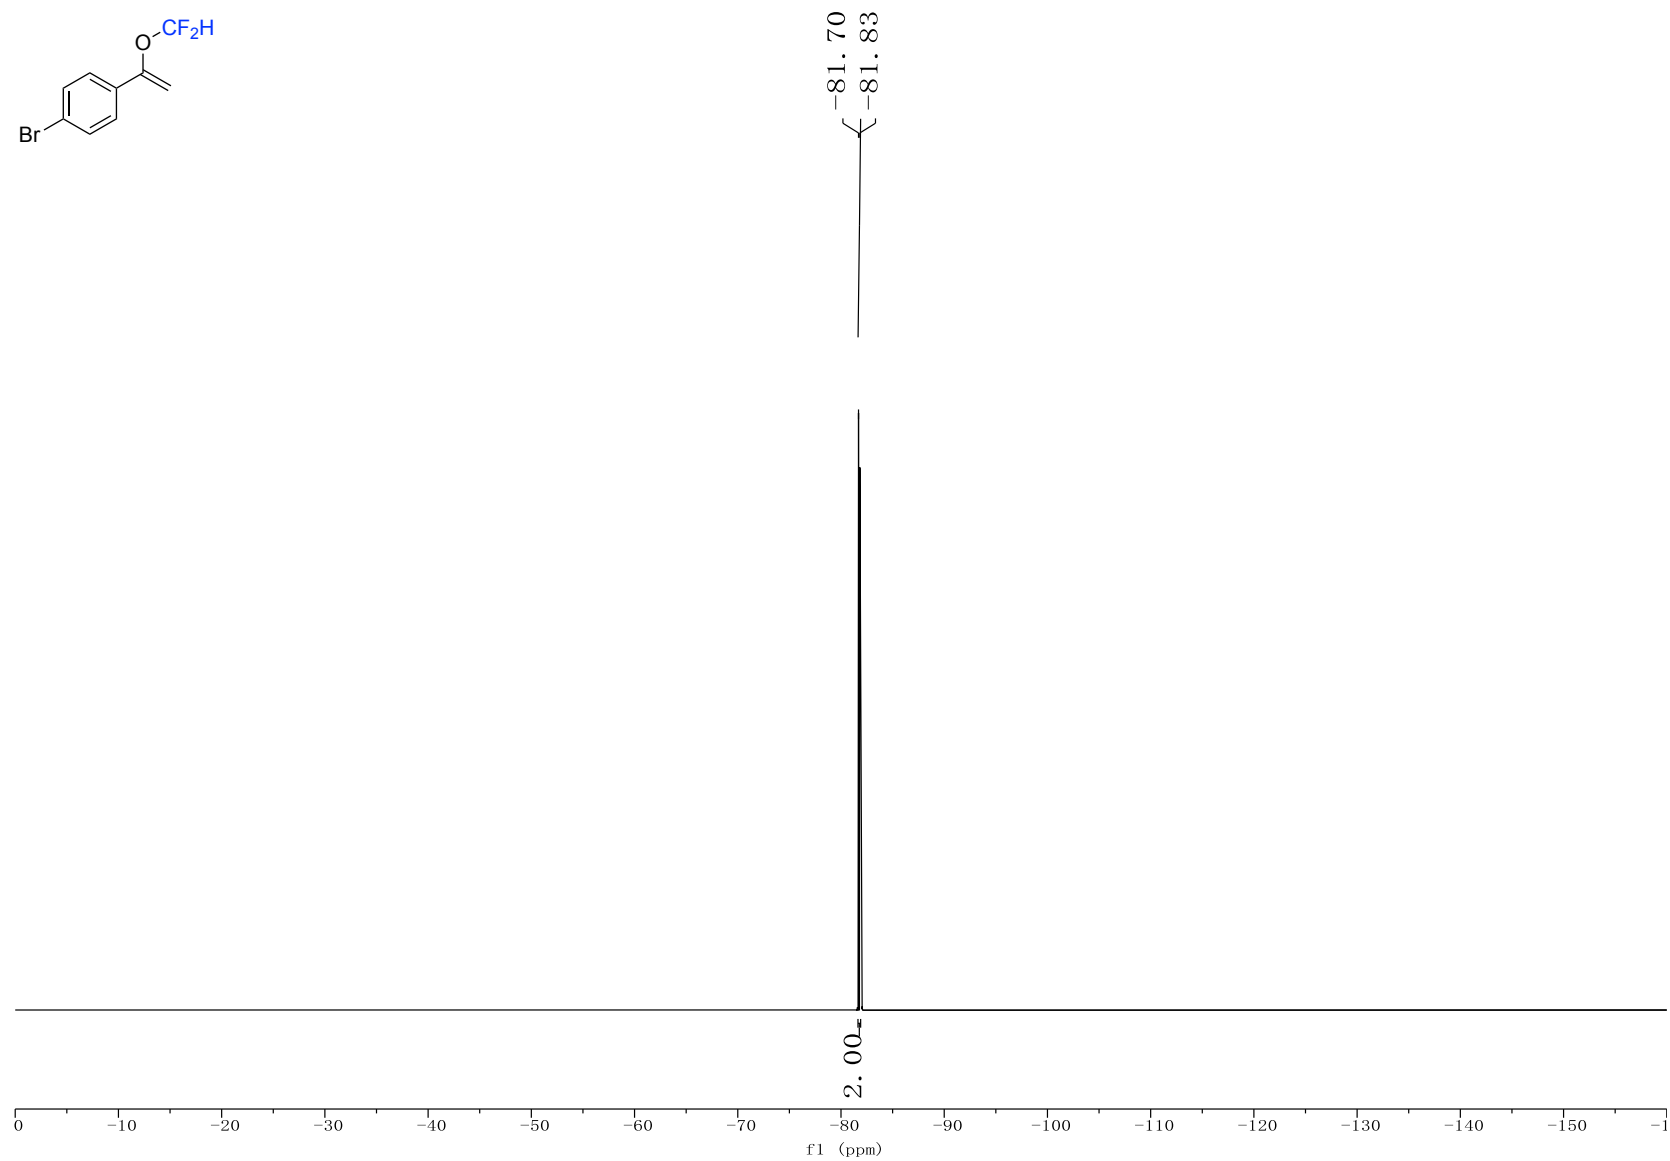



**$^{13}\text{C}\{^1\text{H}\}$  NMR of 1-bromo-4-[1-(difluoromethoxy)vinyl]benzene (3d)**

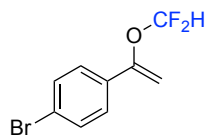

— 153.3  
/ 132.5  
— 131.6  
~ 126.9  
~ 123.7  
— 118.2  
/ 115.7  
/ 113.1  
— 93.4

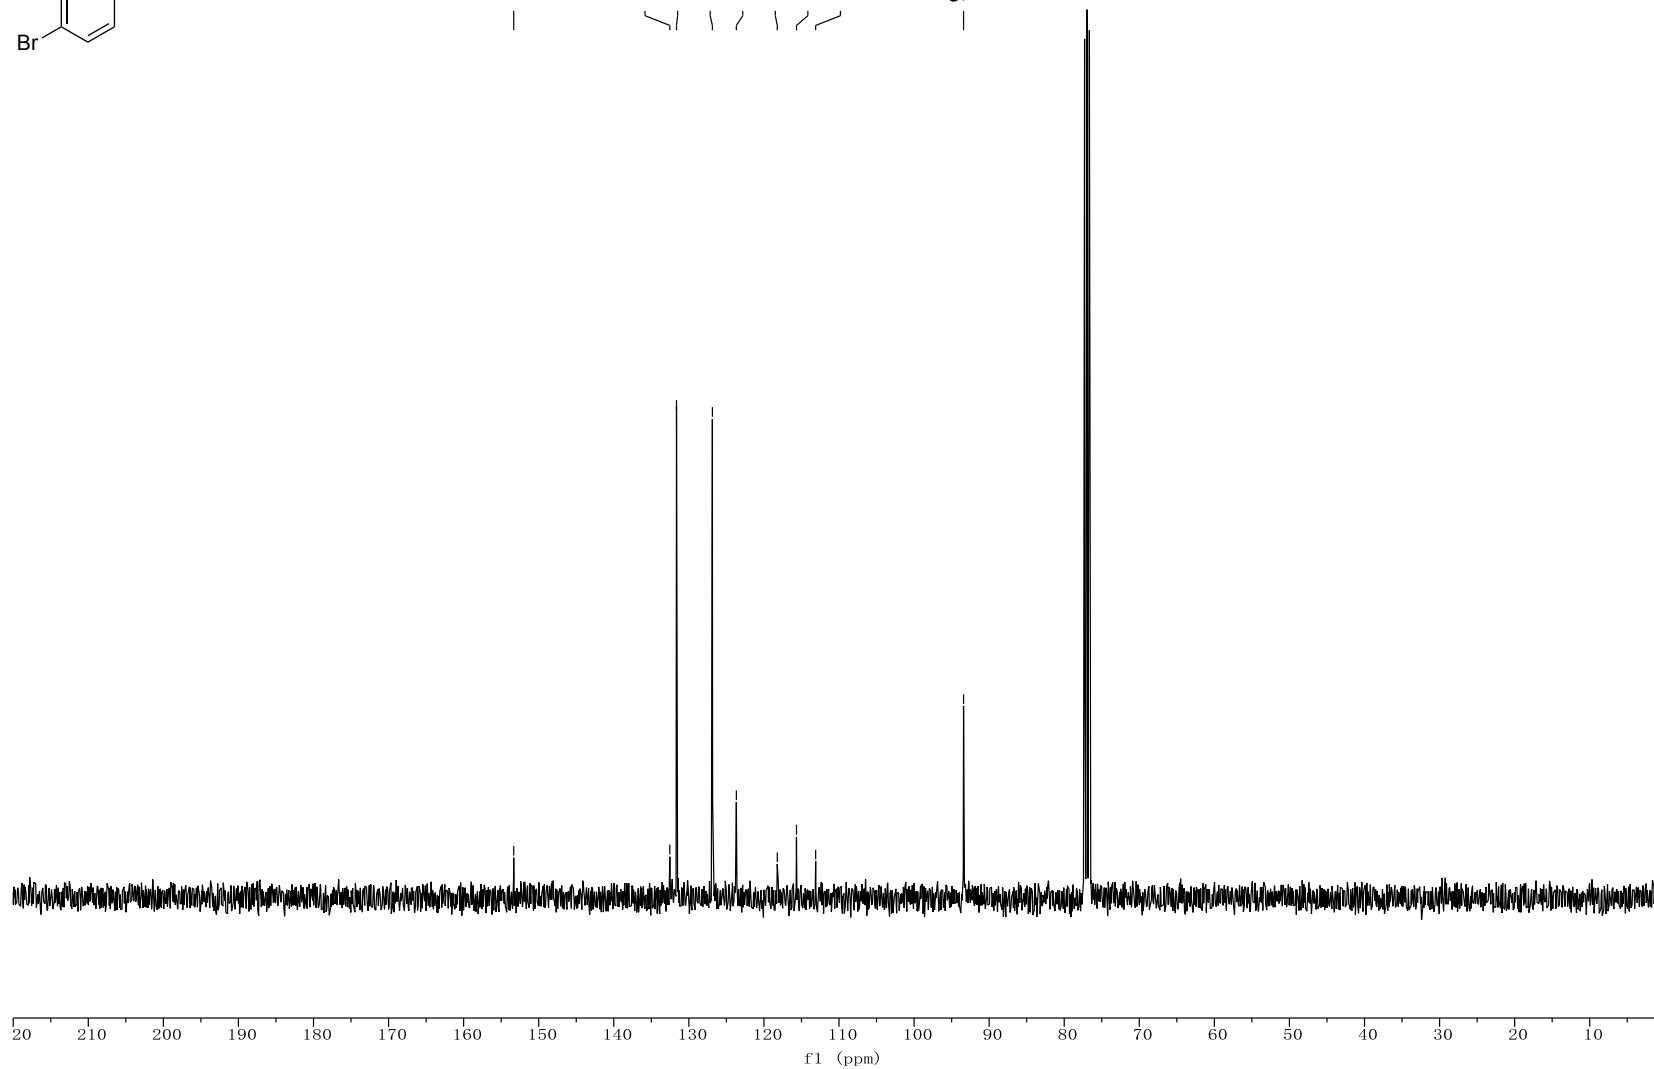

**<sup>1</sup>H NMR of 1-[1-(difluoromethoxy)vinyl]-4-isobutylbenzene (3e)**

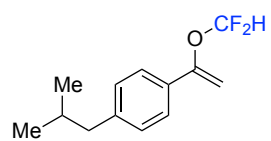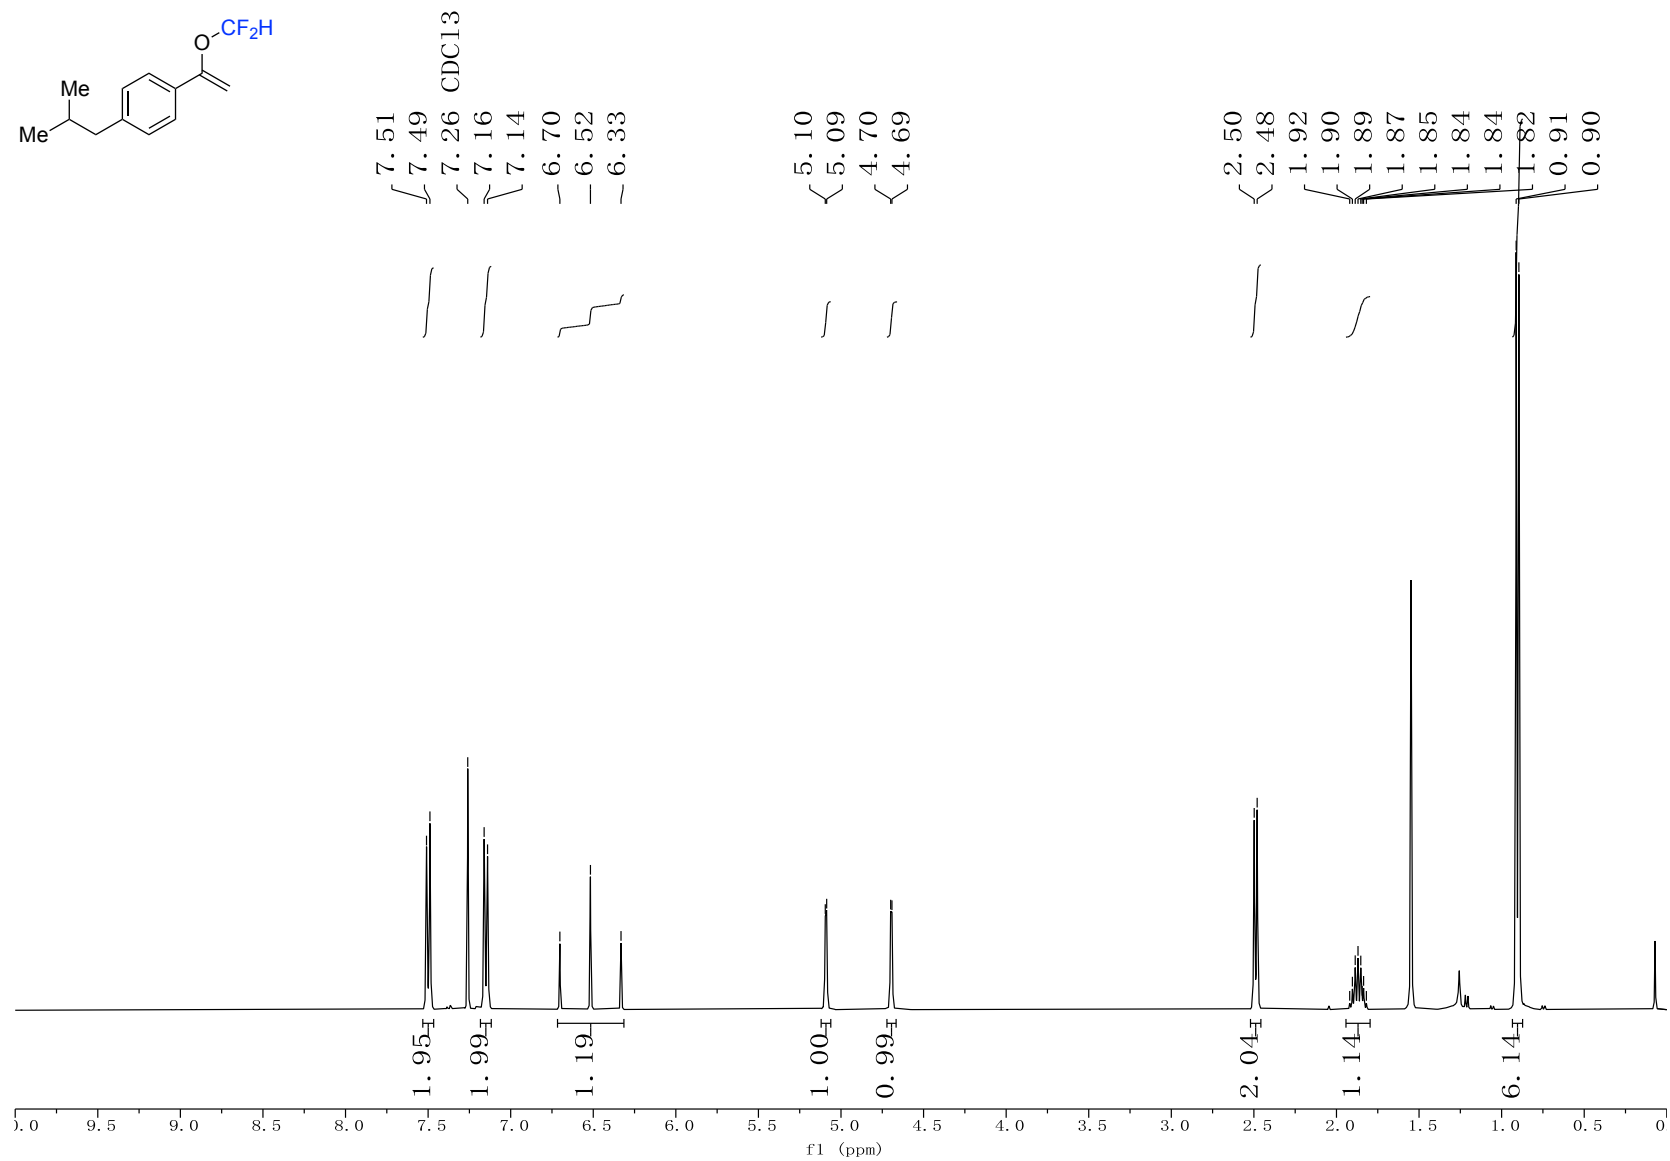

**<sup>19</sup>F NMR of 1-[1-(difluoromethoxy)vinyl]-4-isobutylbenzene (3e)**

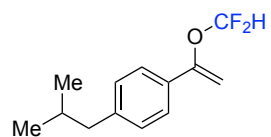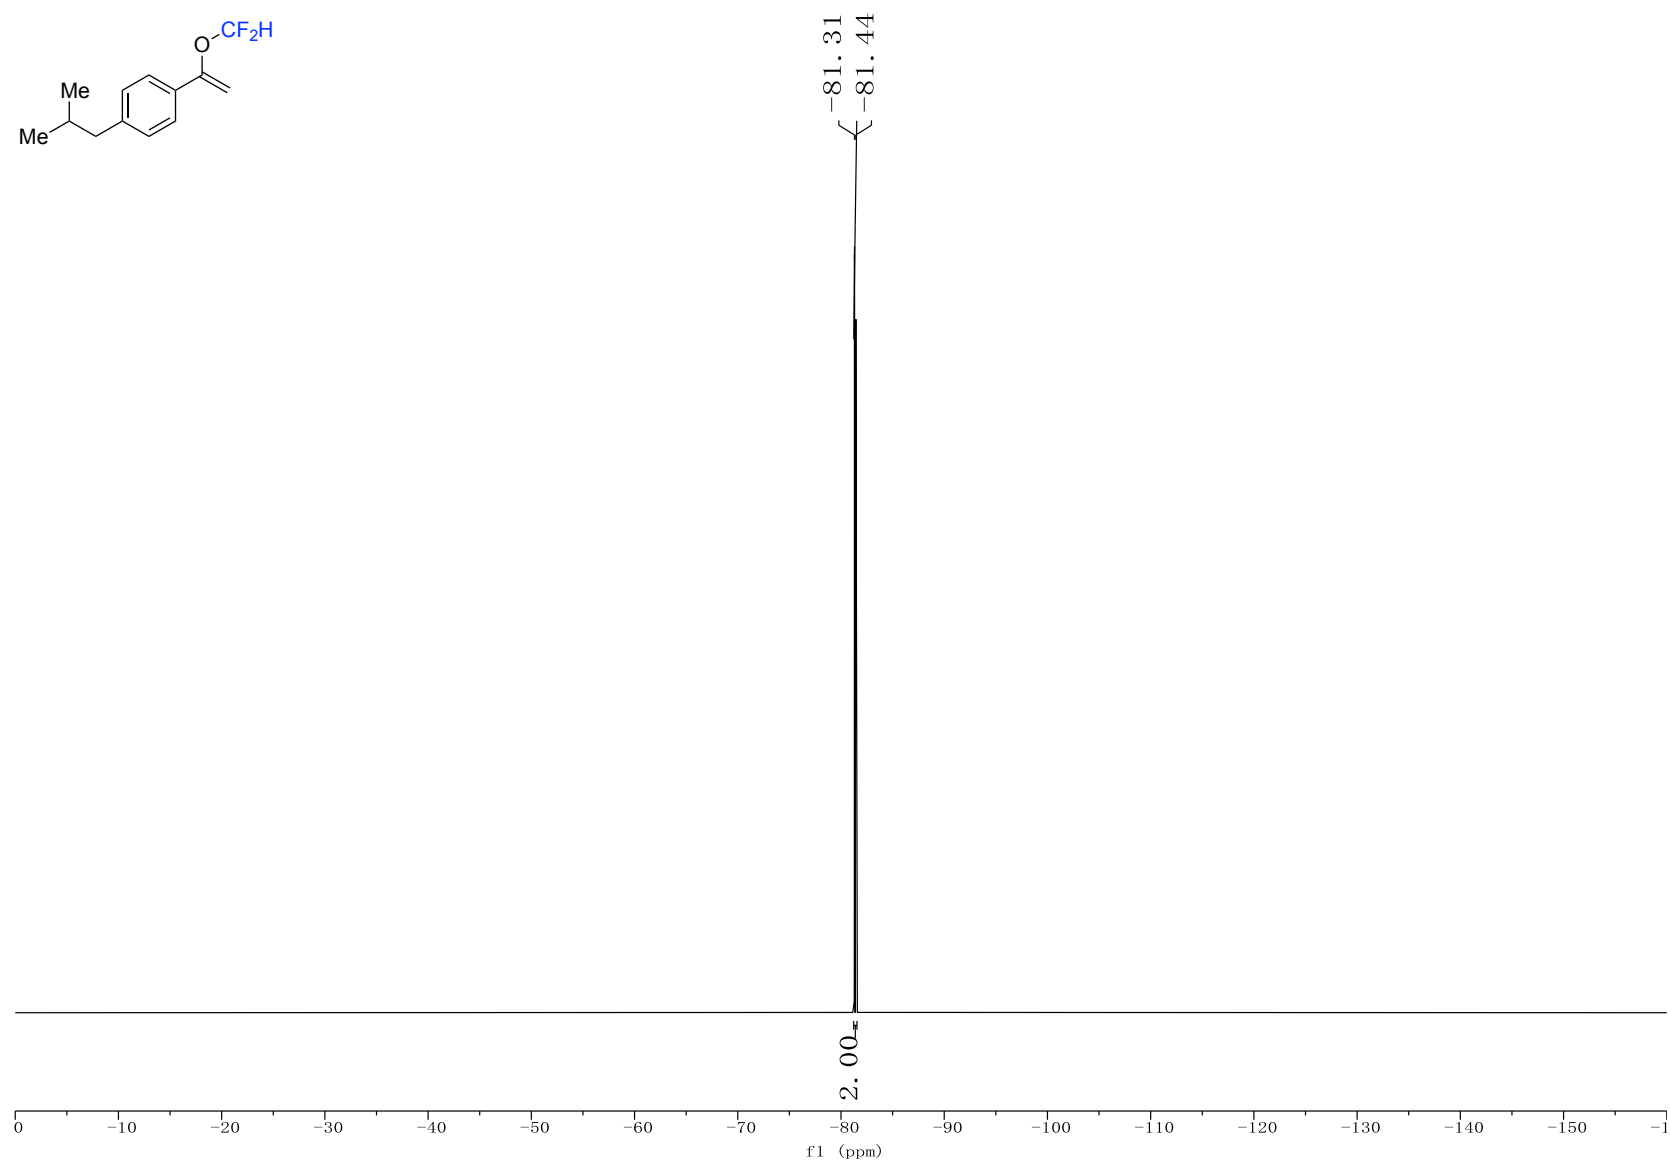

**$^{13}\text{C}\{^1\text{H}\}$  NMR of 1-[1-(difluoromethoxy)vinyl]-4-isobutylbenzene (3e)**

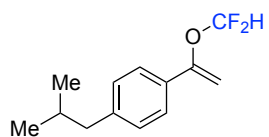

|         |         |         |         |         |         |         |         |        |        |        |        |
|---------|---------|---------|---------|---------|---------|---------|---------|--------|--------|--------|--------|
| — 154.5 | — 143.4 | ~ 131.0 | ~ 129.2 | ~ 125.1 | ~ 118.4 | ~ 115.9 | ~ 113.3 | — 92.3 | — 45.1 | — 30.2 | — 22.3 |
|---------|---------|---------|---------|---------|---------|---------|---------|--------|--------|--------|--------|

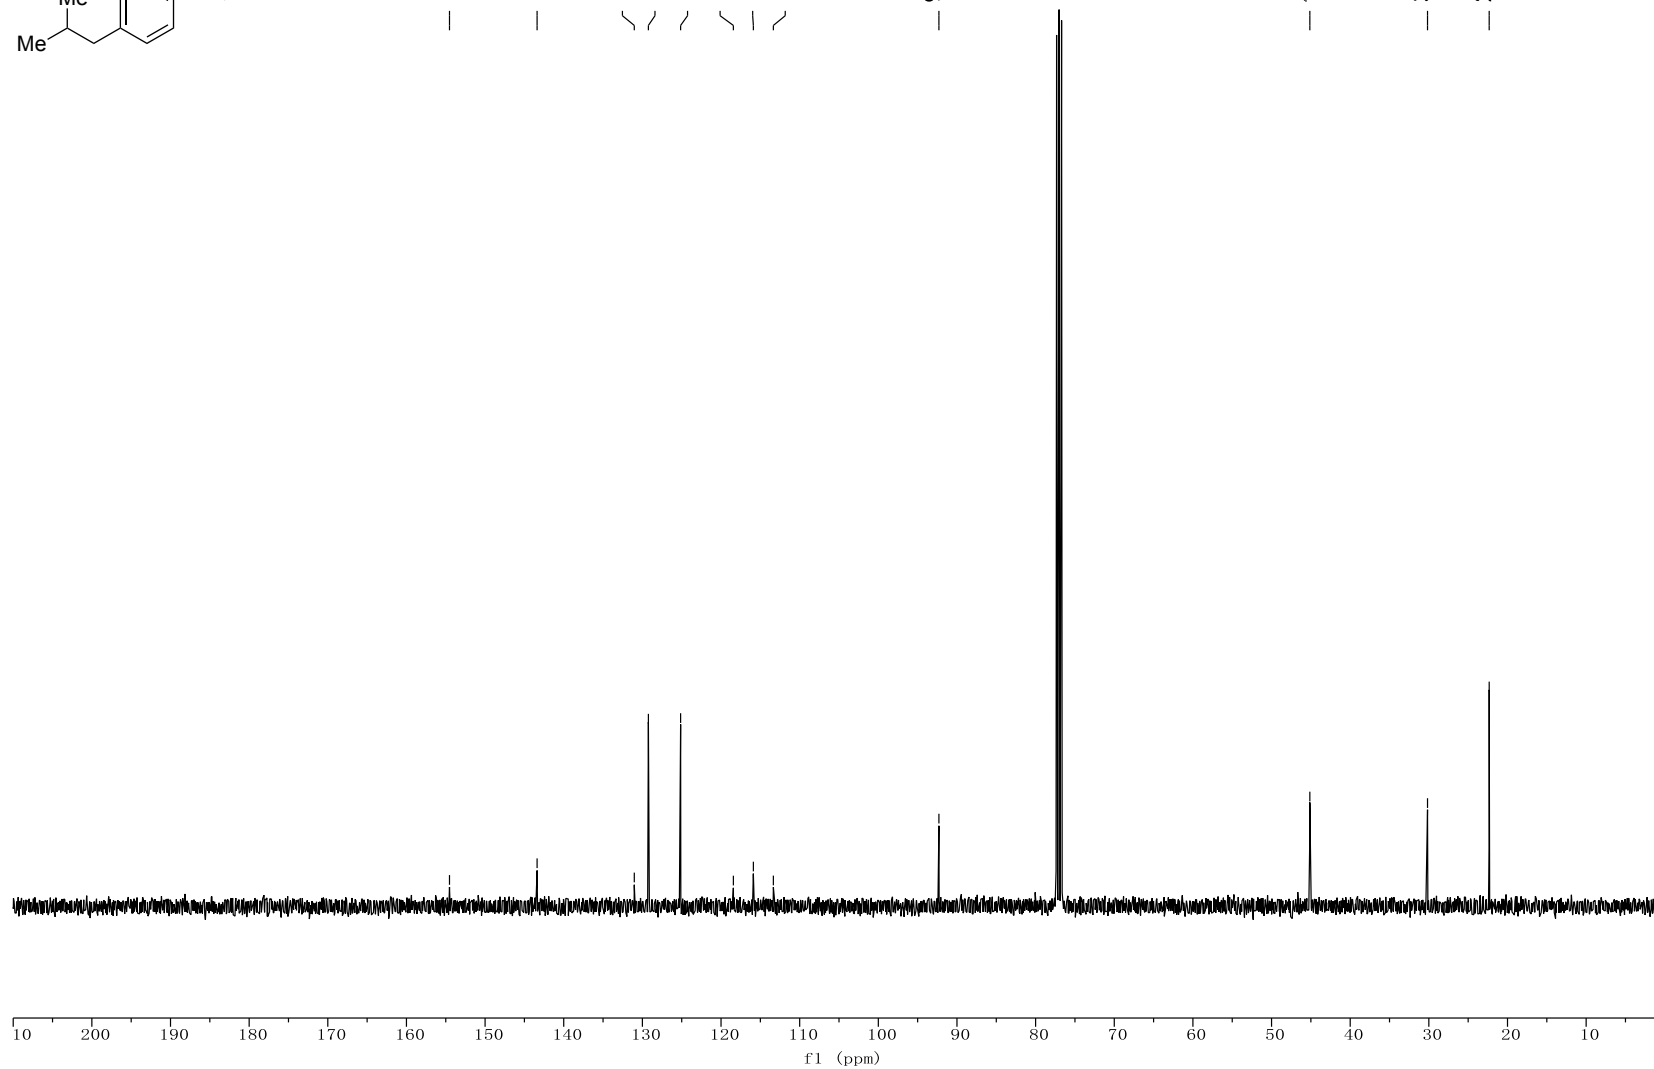

**<sup>1</sup>H NMR of the crude reaction mixture of 1-[1-(difluoromethoxy)vinyl]-2-methylbenzene (3f)**

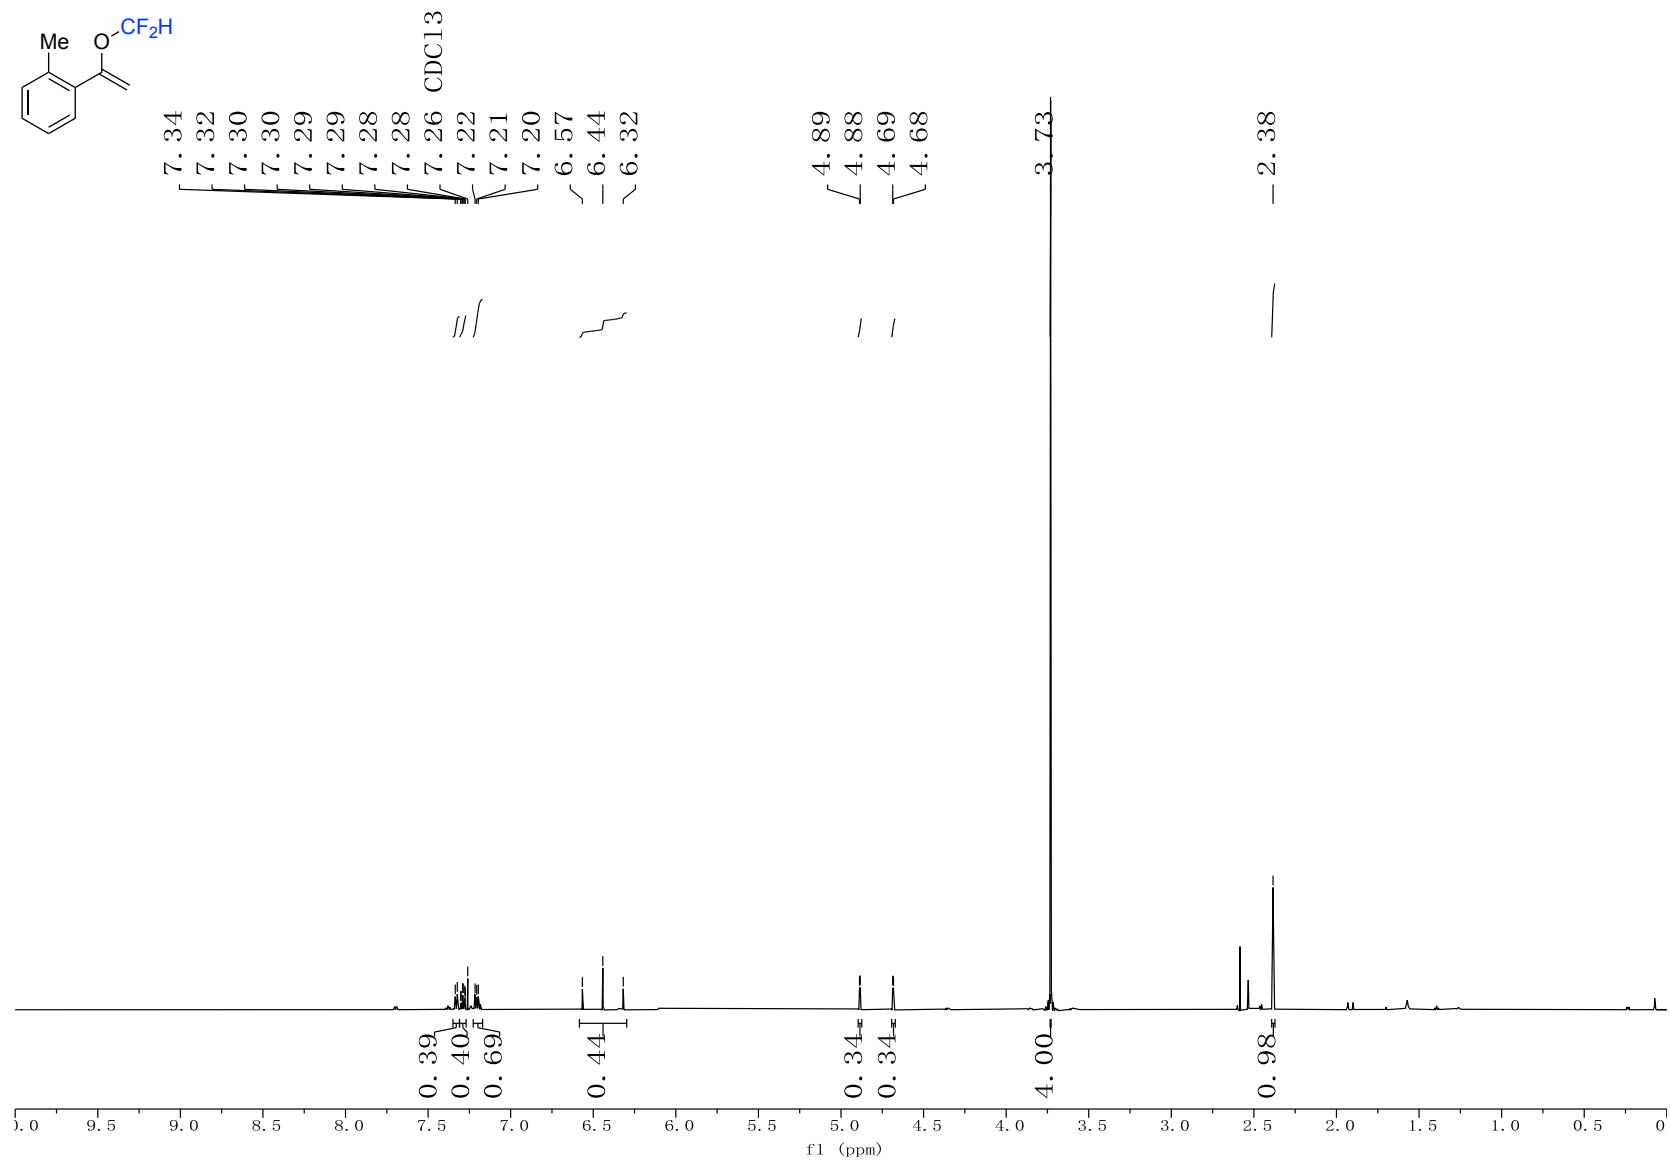

**<sup>19</sup>F NMR of the crude reaction mixture of 1-[1-(difluoromethoxy)vinyl]-2-methylbenzene (3f)**

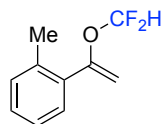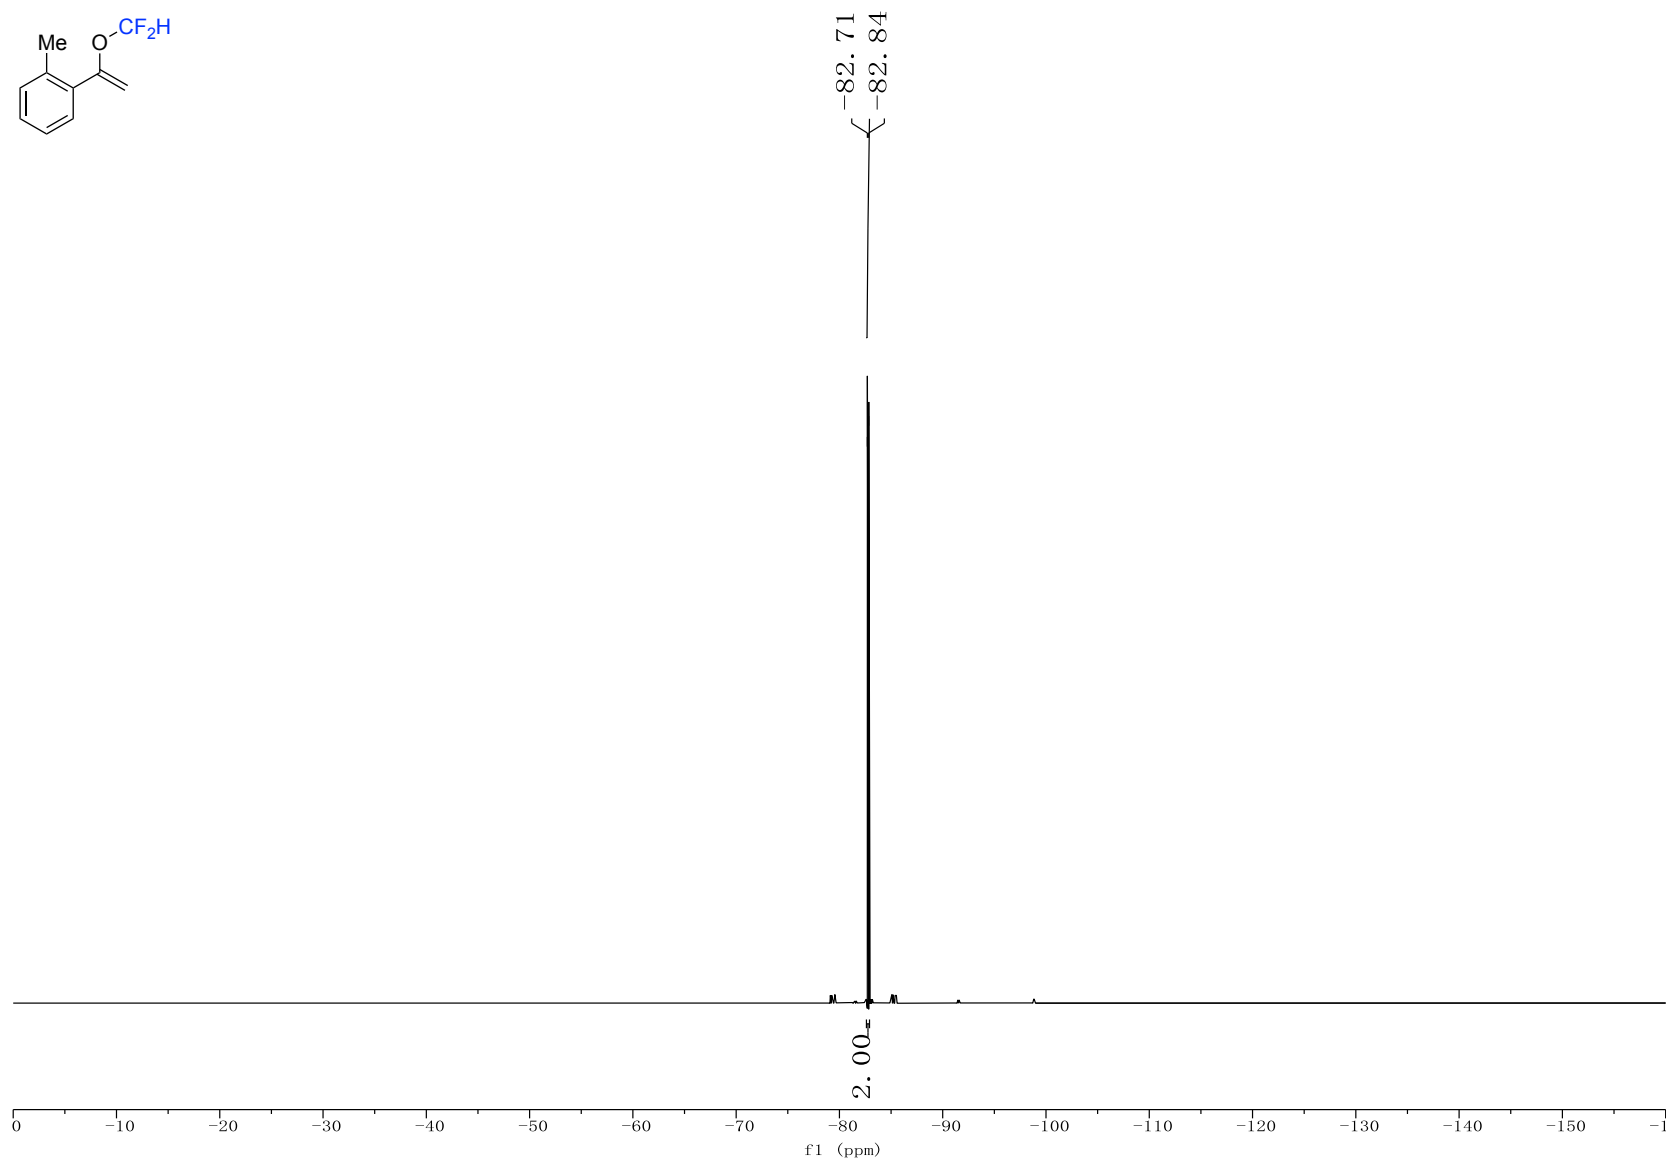

**$^{13}\text{C}\{^1\text{H}\}$  NMR of the crude reaction mixture of 1-[1-(difluoromethoxy)vinyl]-2-methylbenzene (3f)**

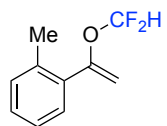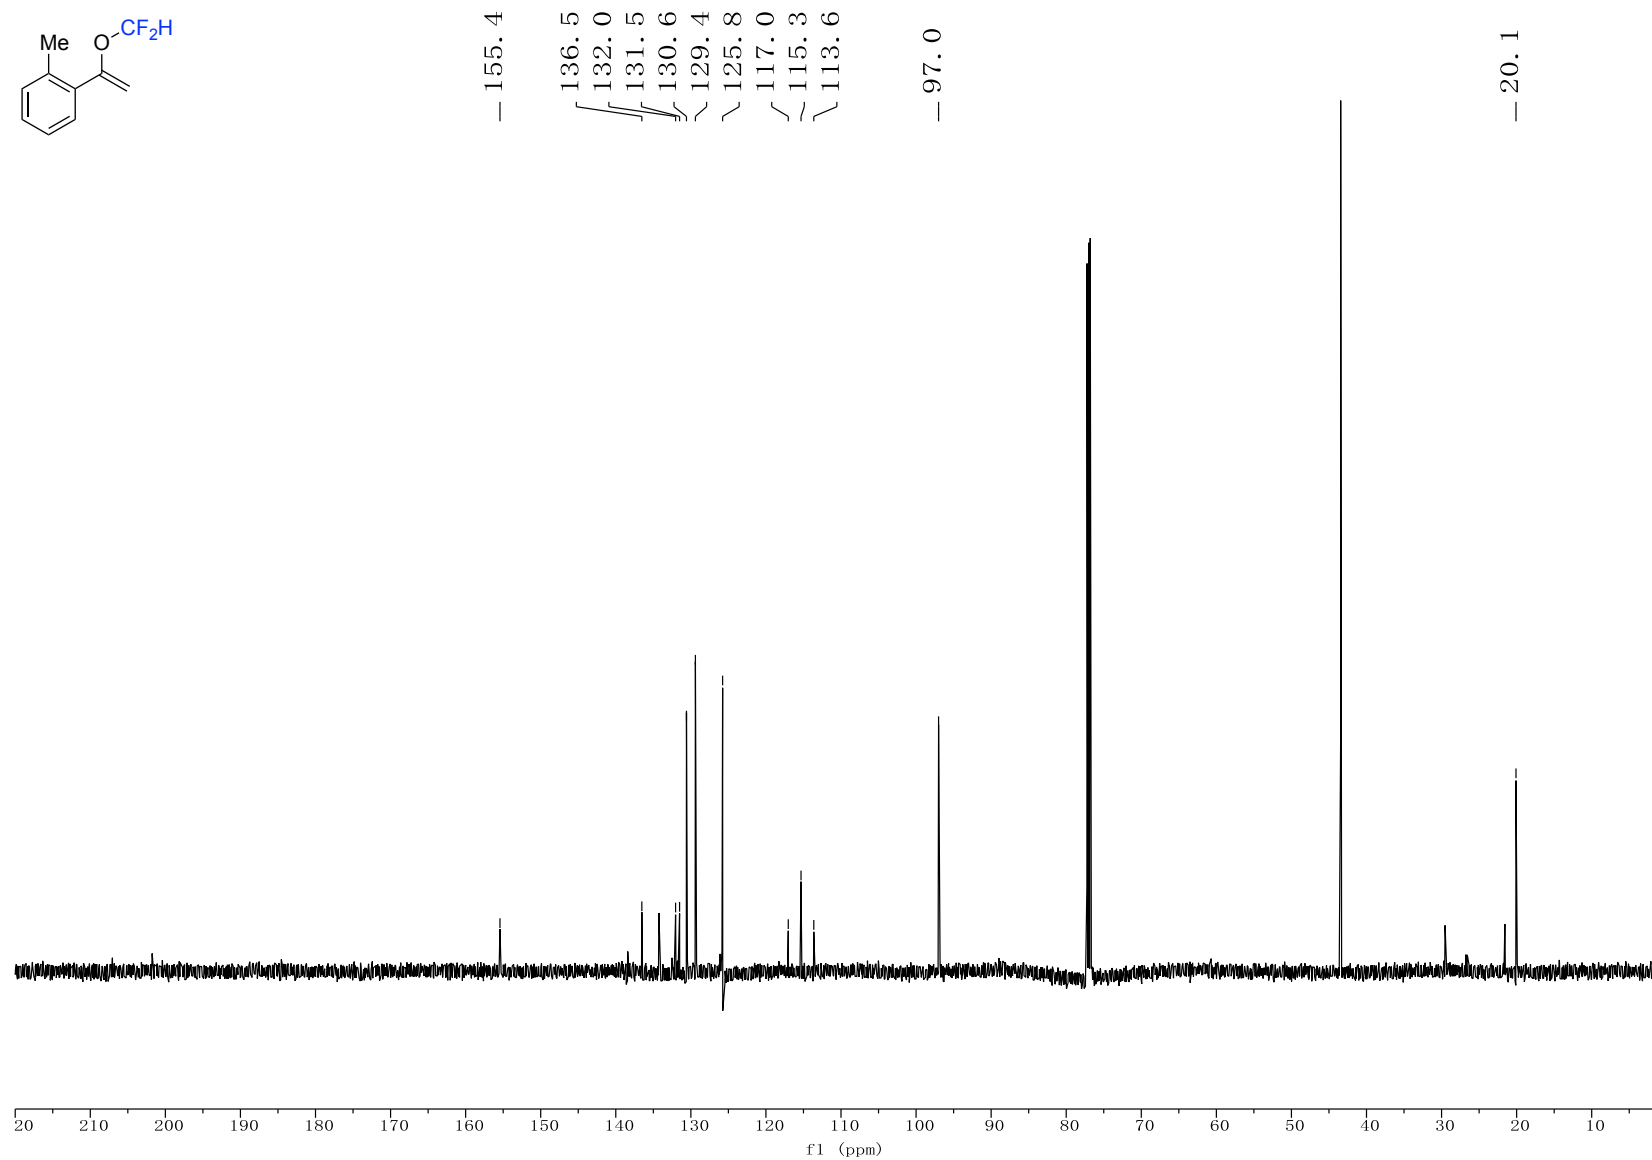

**<sup>1</sup>H NMR of the crude reaction mixture of 1-[1-(difluoromethoxy)vinyl]-2-methoxybenzene (3g)**

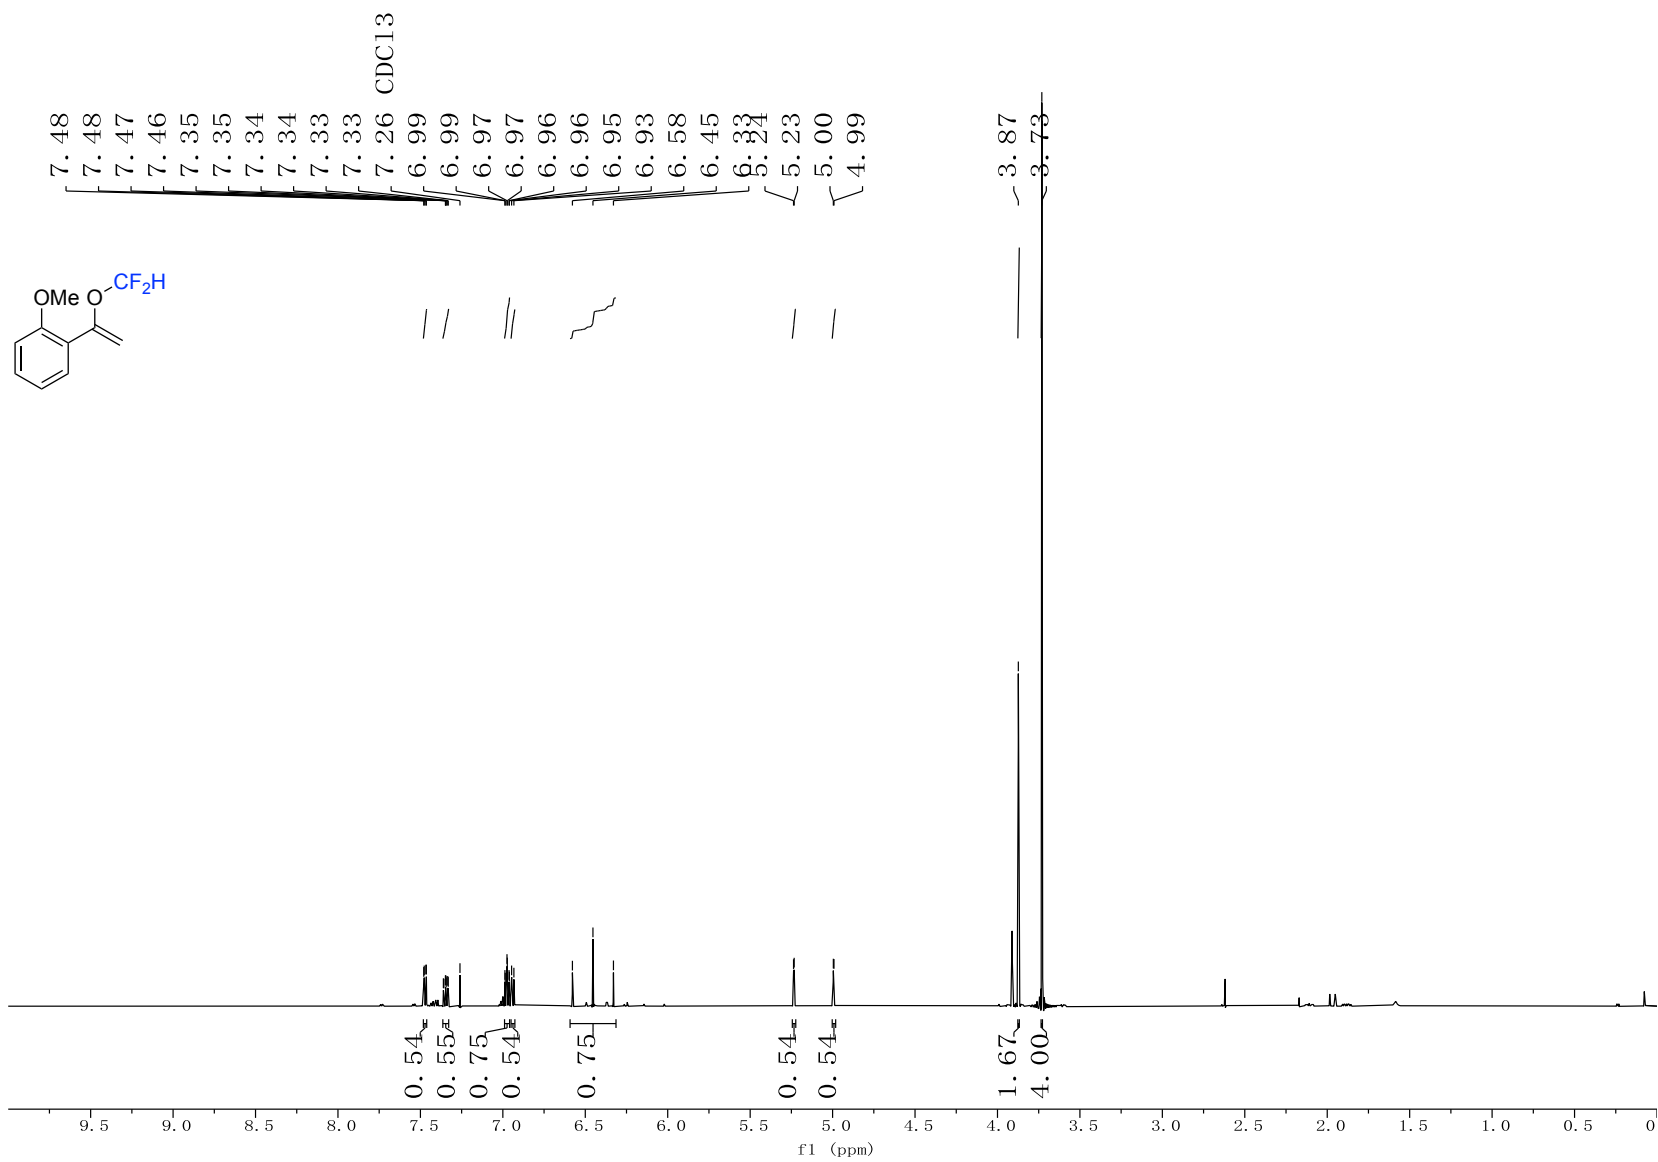



**<sup>19</sup>F NMR of the crude reaction mixture of 1-[1-(difluoromethoxy)vinyl]-2-methoxybenzene (3g)**

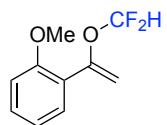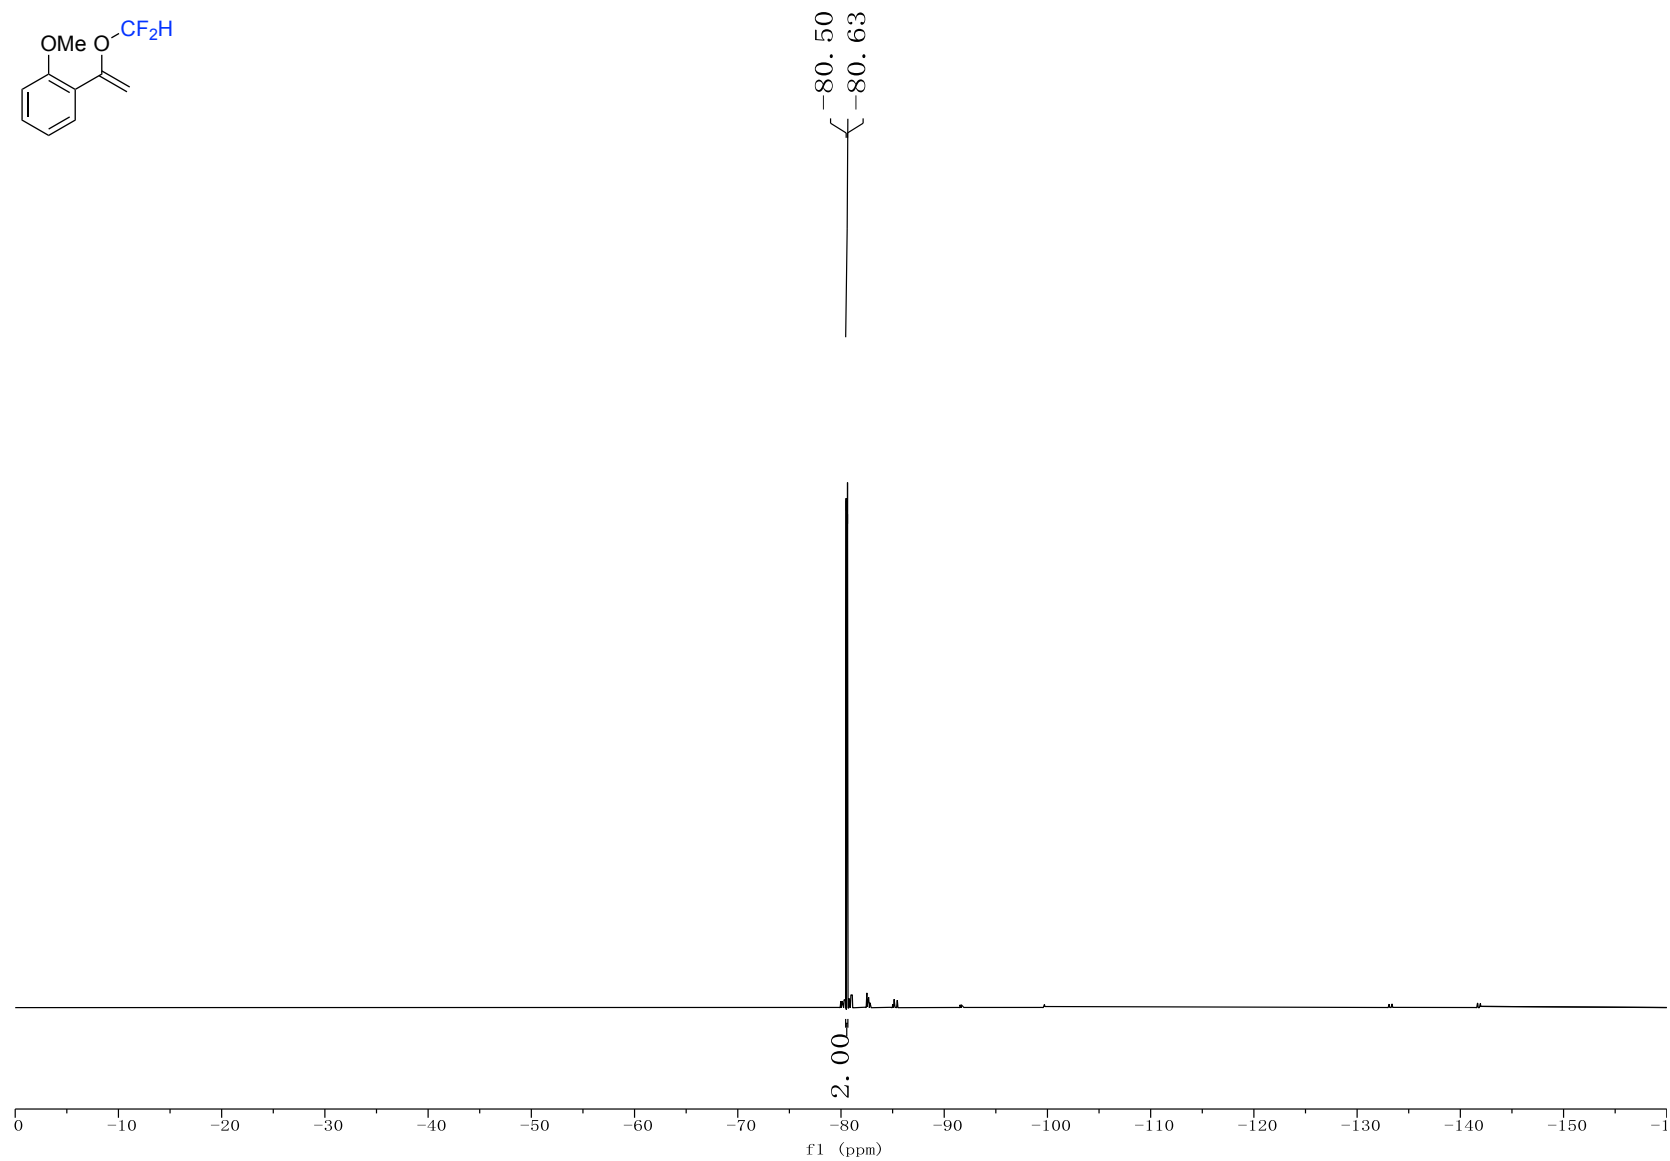

**$^{13}\text{C}\{^1\text{H}\}$  NMR of the crude reaction mixture of 1-[1-(difluoromethoxy)vinyl]-2-methoxybenzene (3g)**

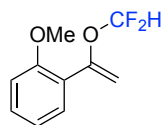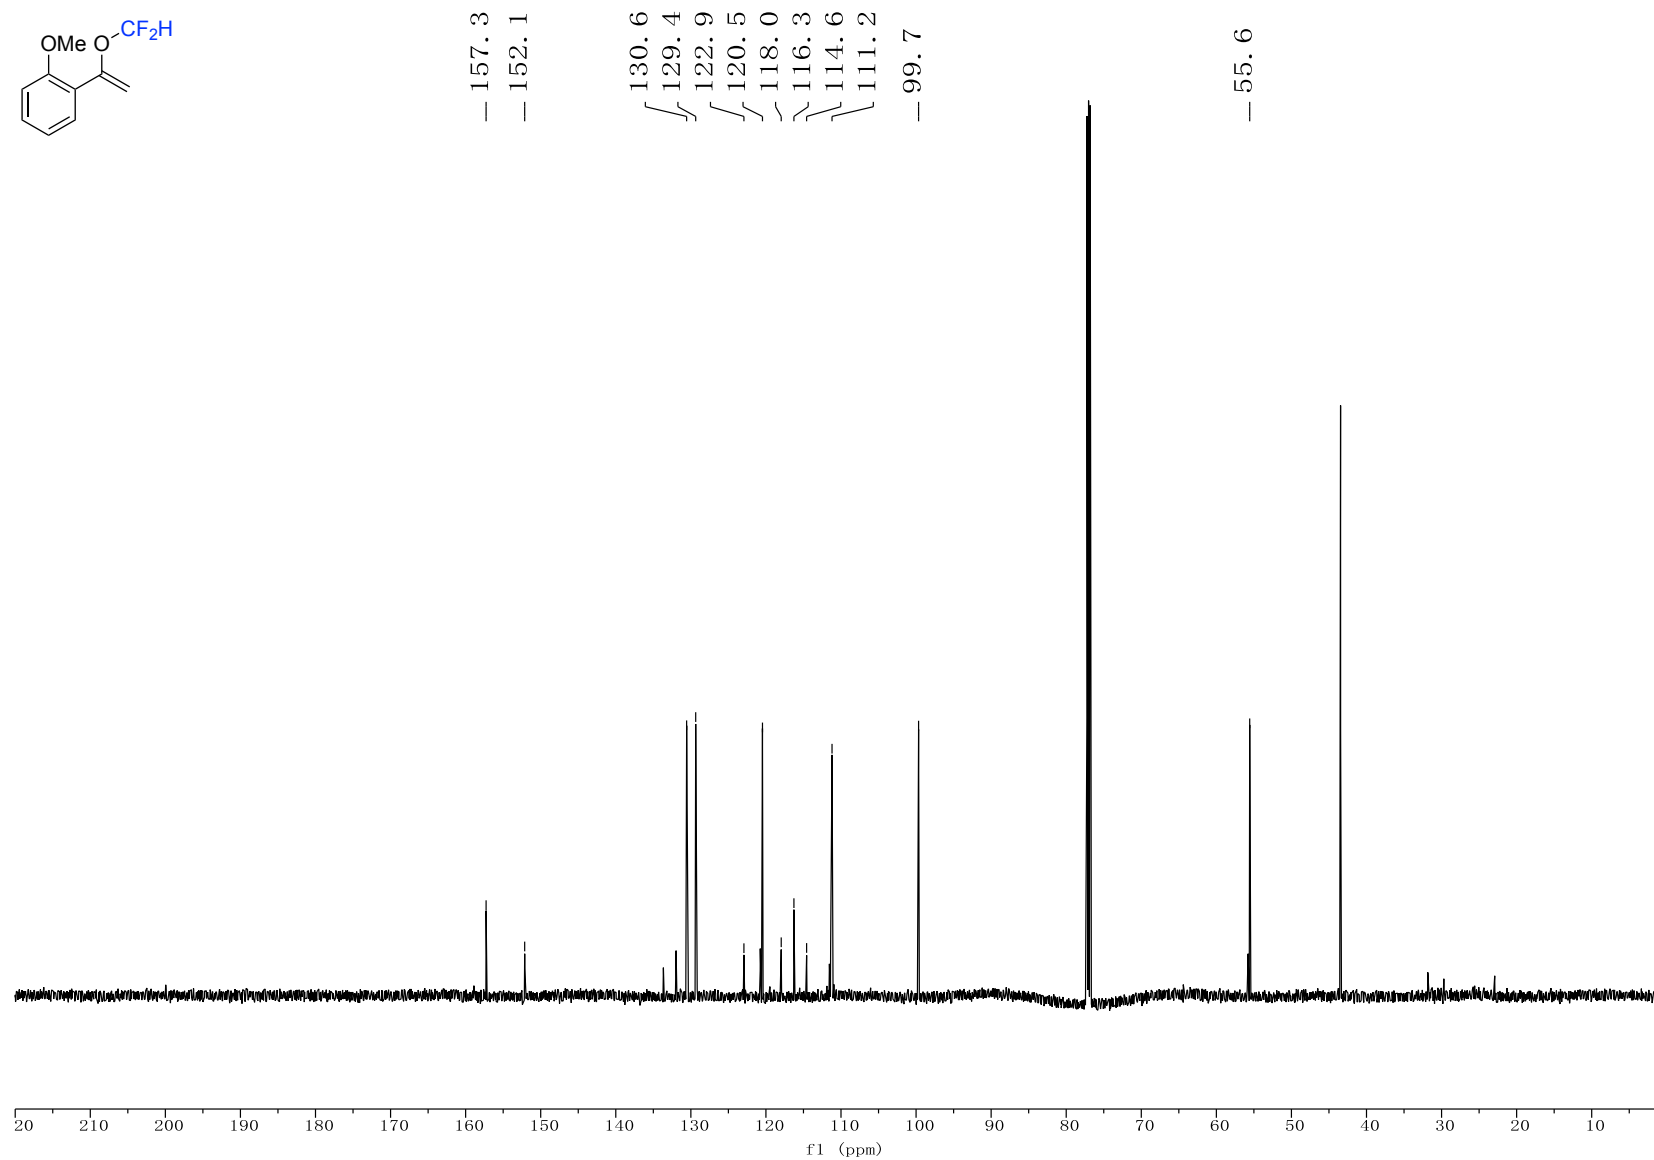

**<sup>1</sup>H NMR of 2-[1-(difluoromethoxy)vinyl]-1,3,5-trimethylbenzene (3h)**

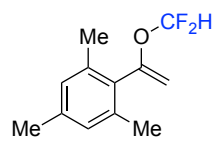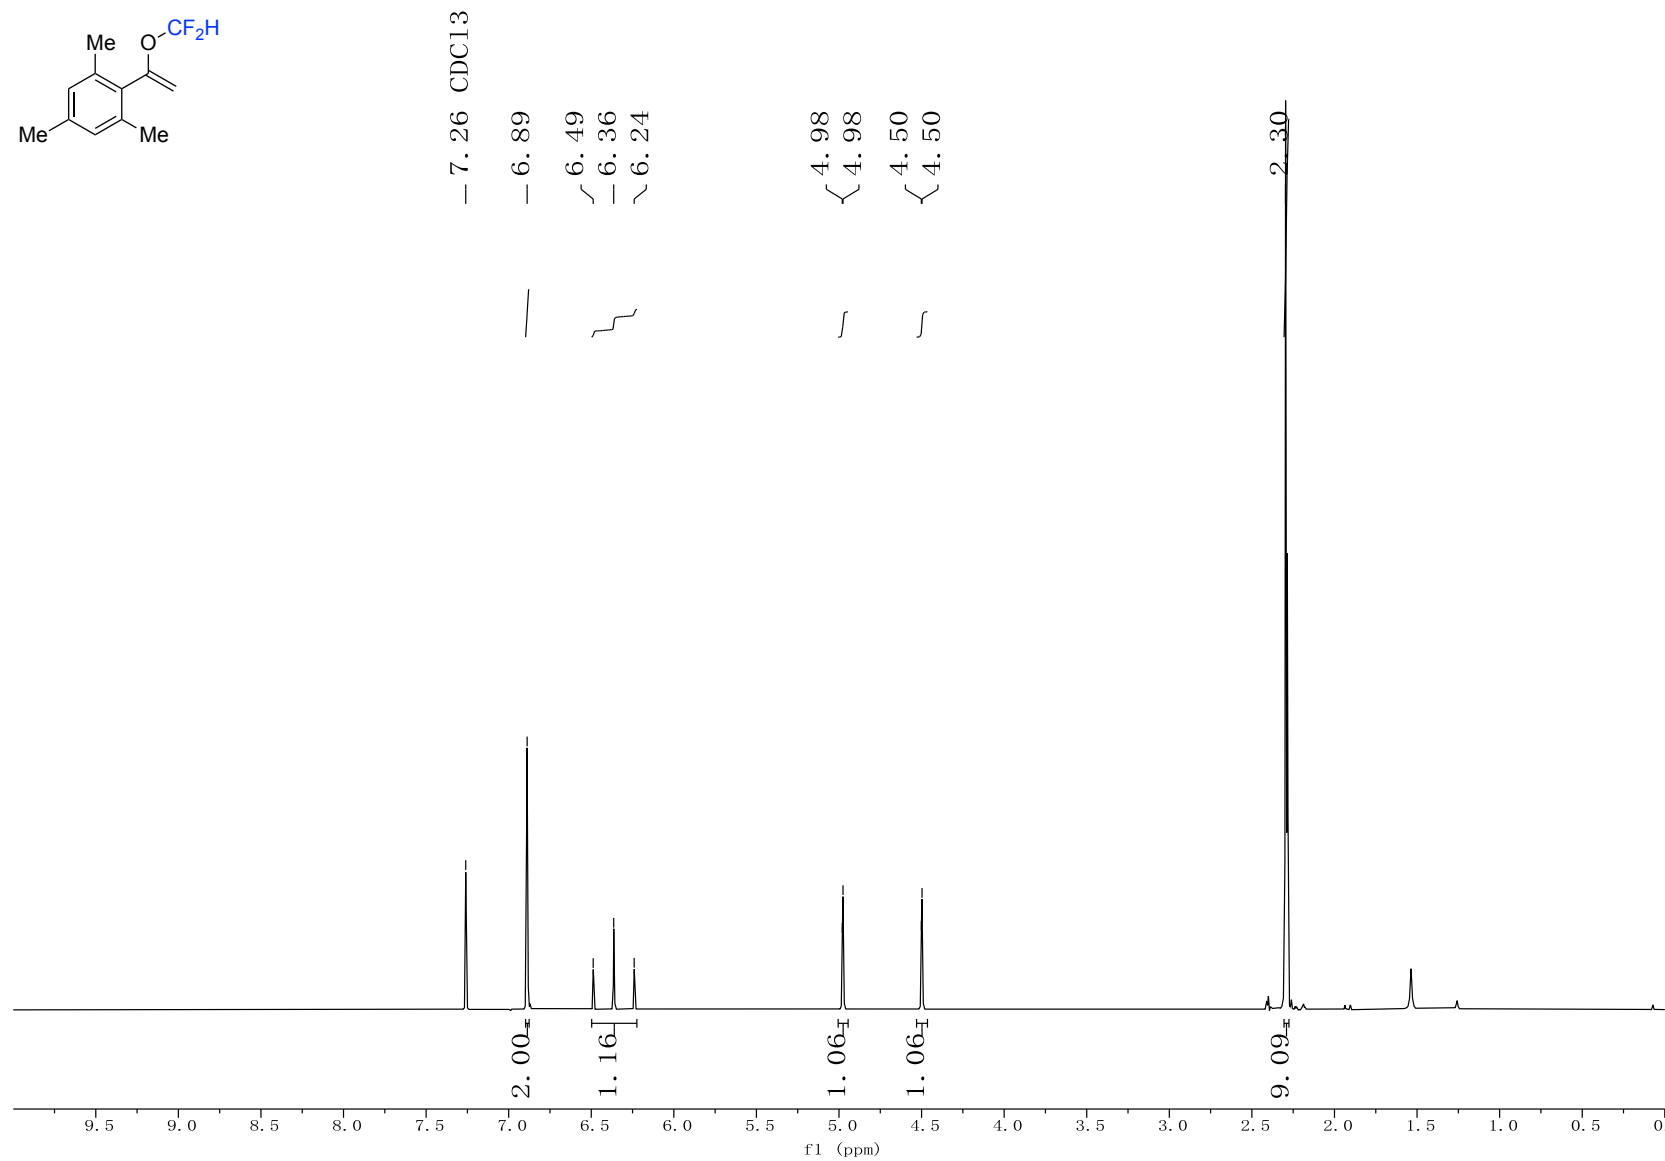

**<sup>19</sup>F NMR of 2-[1-(difluoromethoxy)vinyl]-1,3,5-trimethylbenzene (3h)**

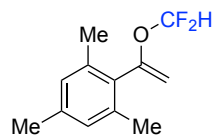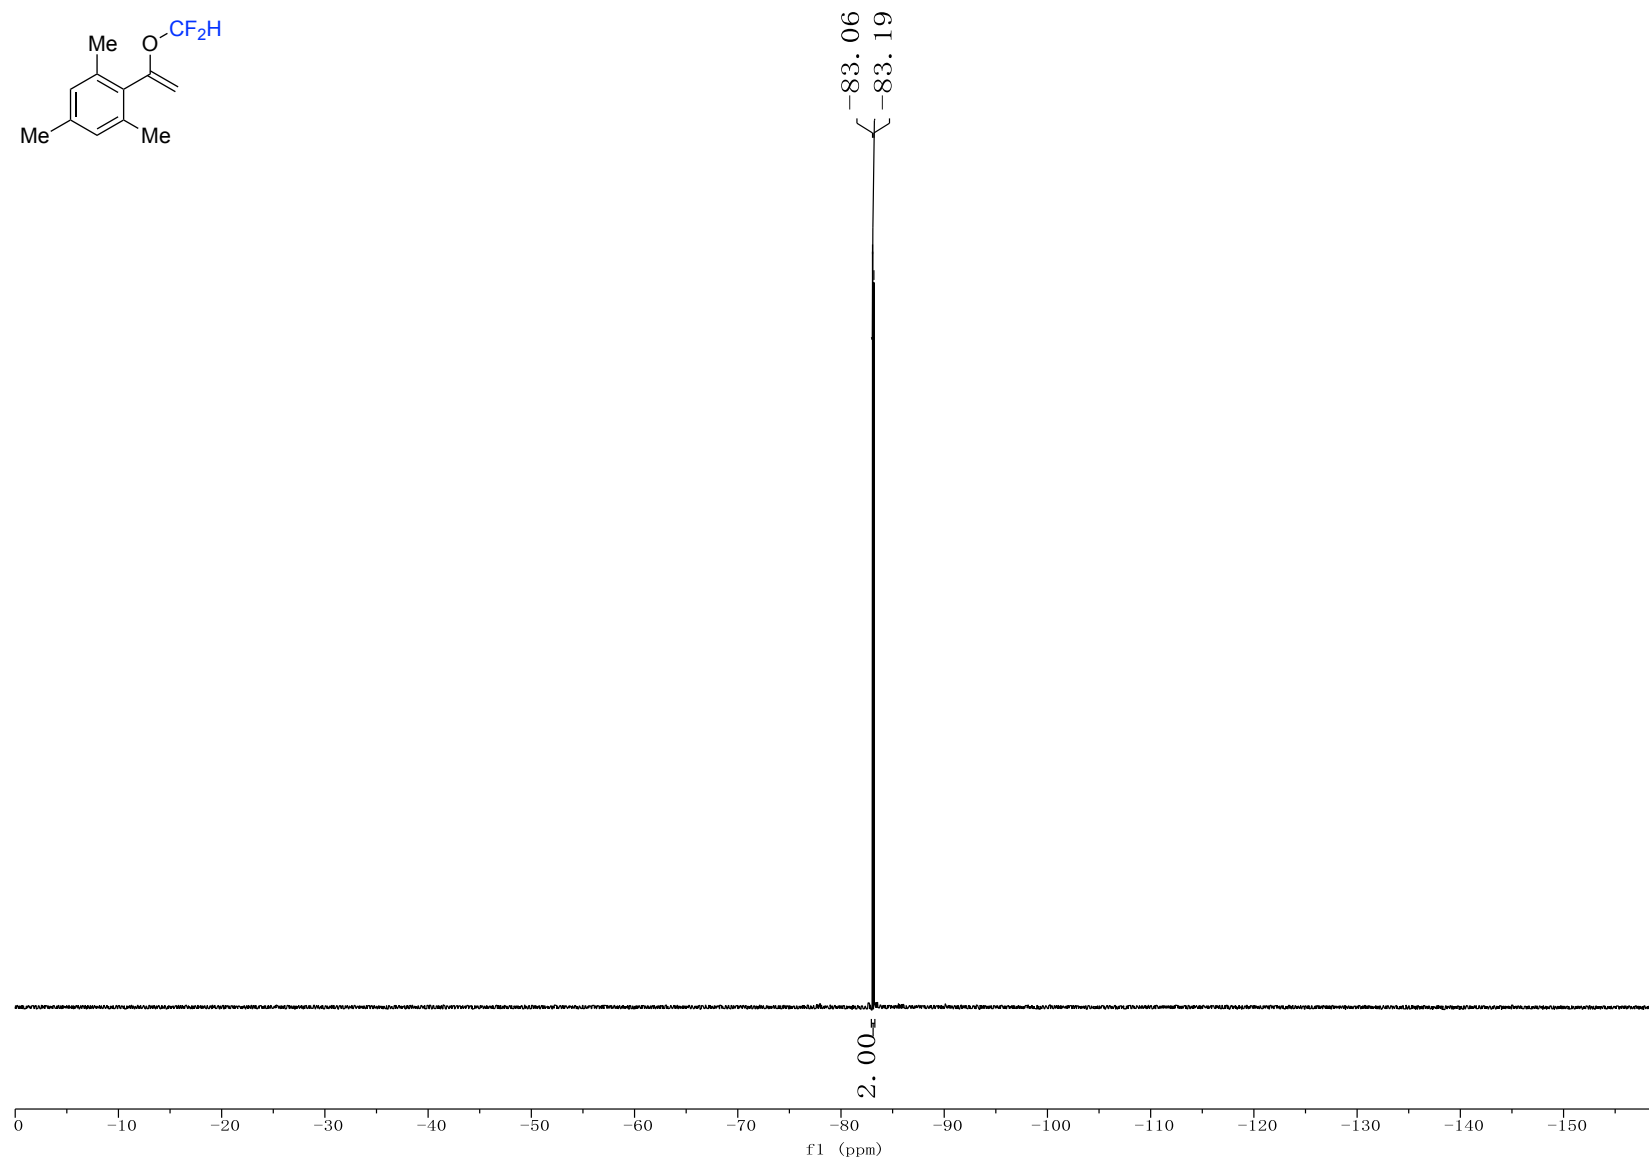

**$^{13}\text{C}\{^1\text{H}\}$  NMR of 2-[1-(difluoromethoxy)vinyl]-1,3,5-trimethylbenzene (3h)**

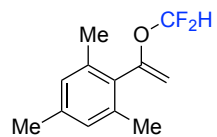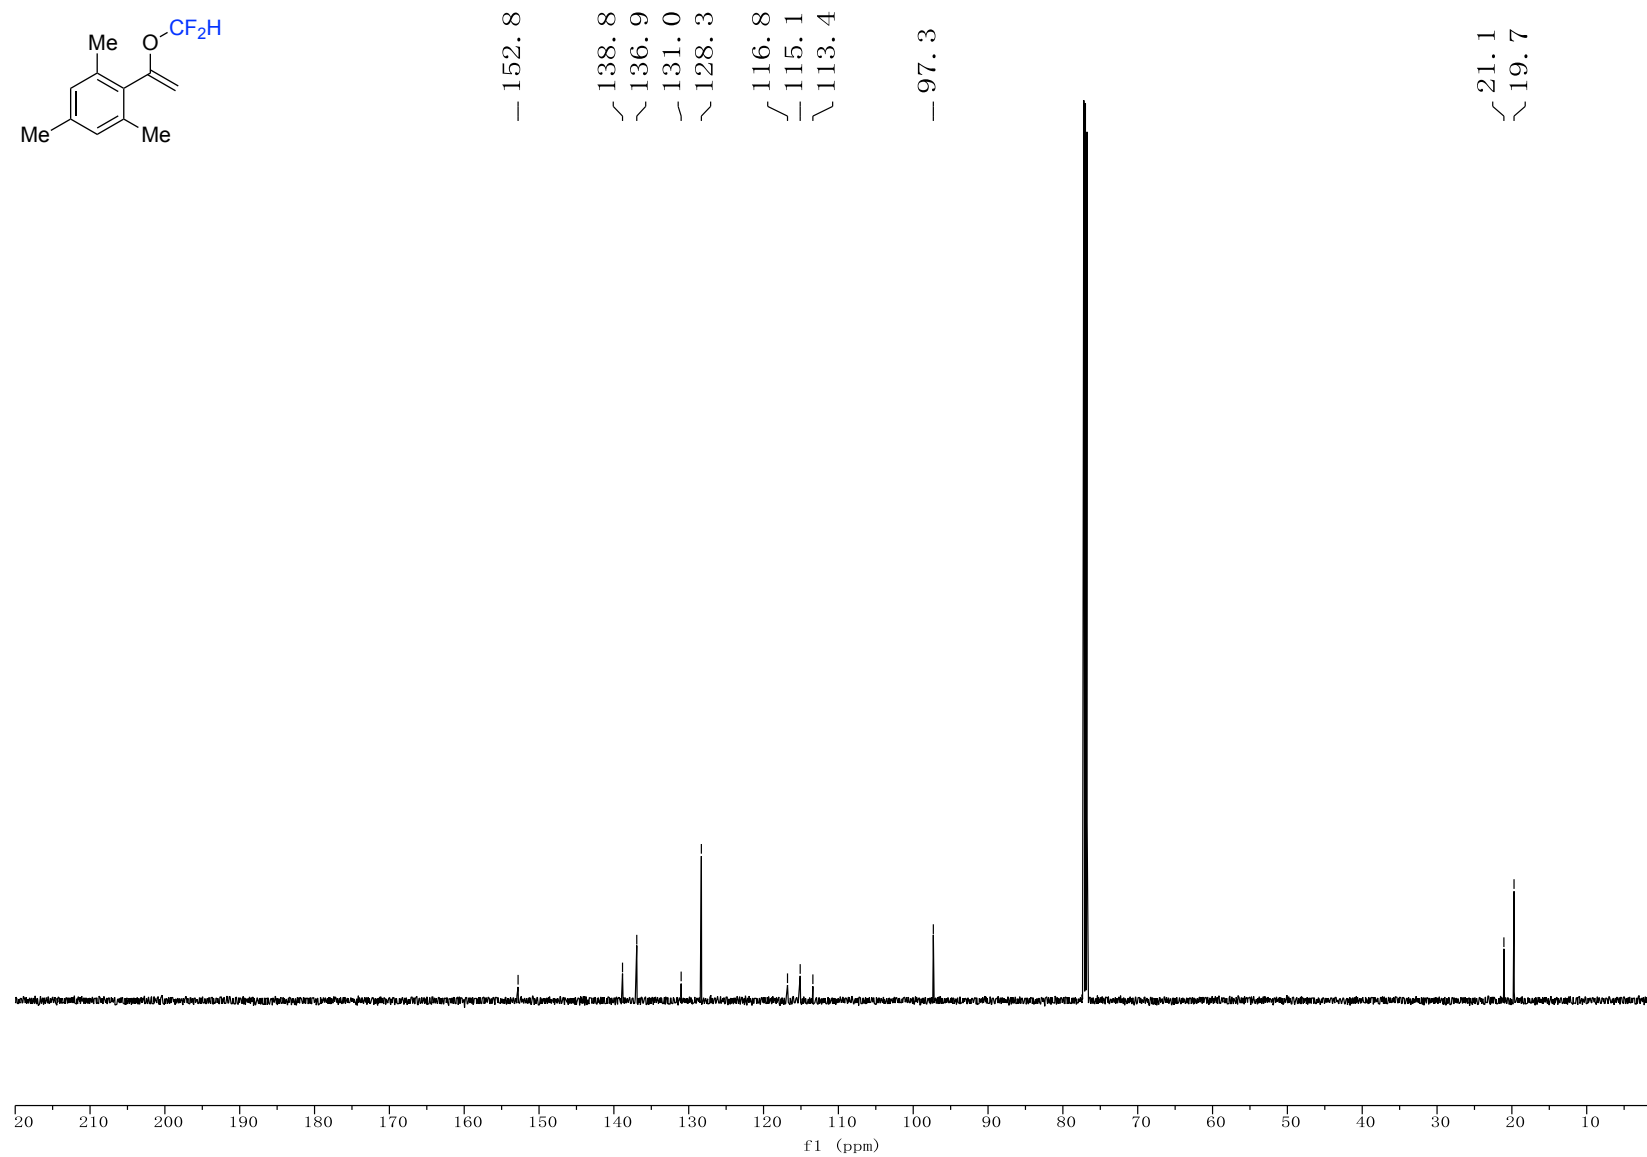

**<sup>1</sup>H NMR of the crude reaction mixture of 2-[1-(difluoromethoxy)vinyl]naphthalene (3i)**

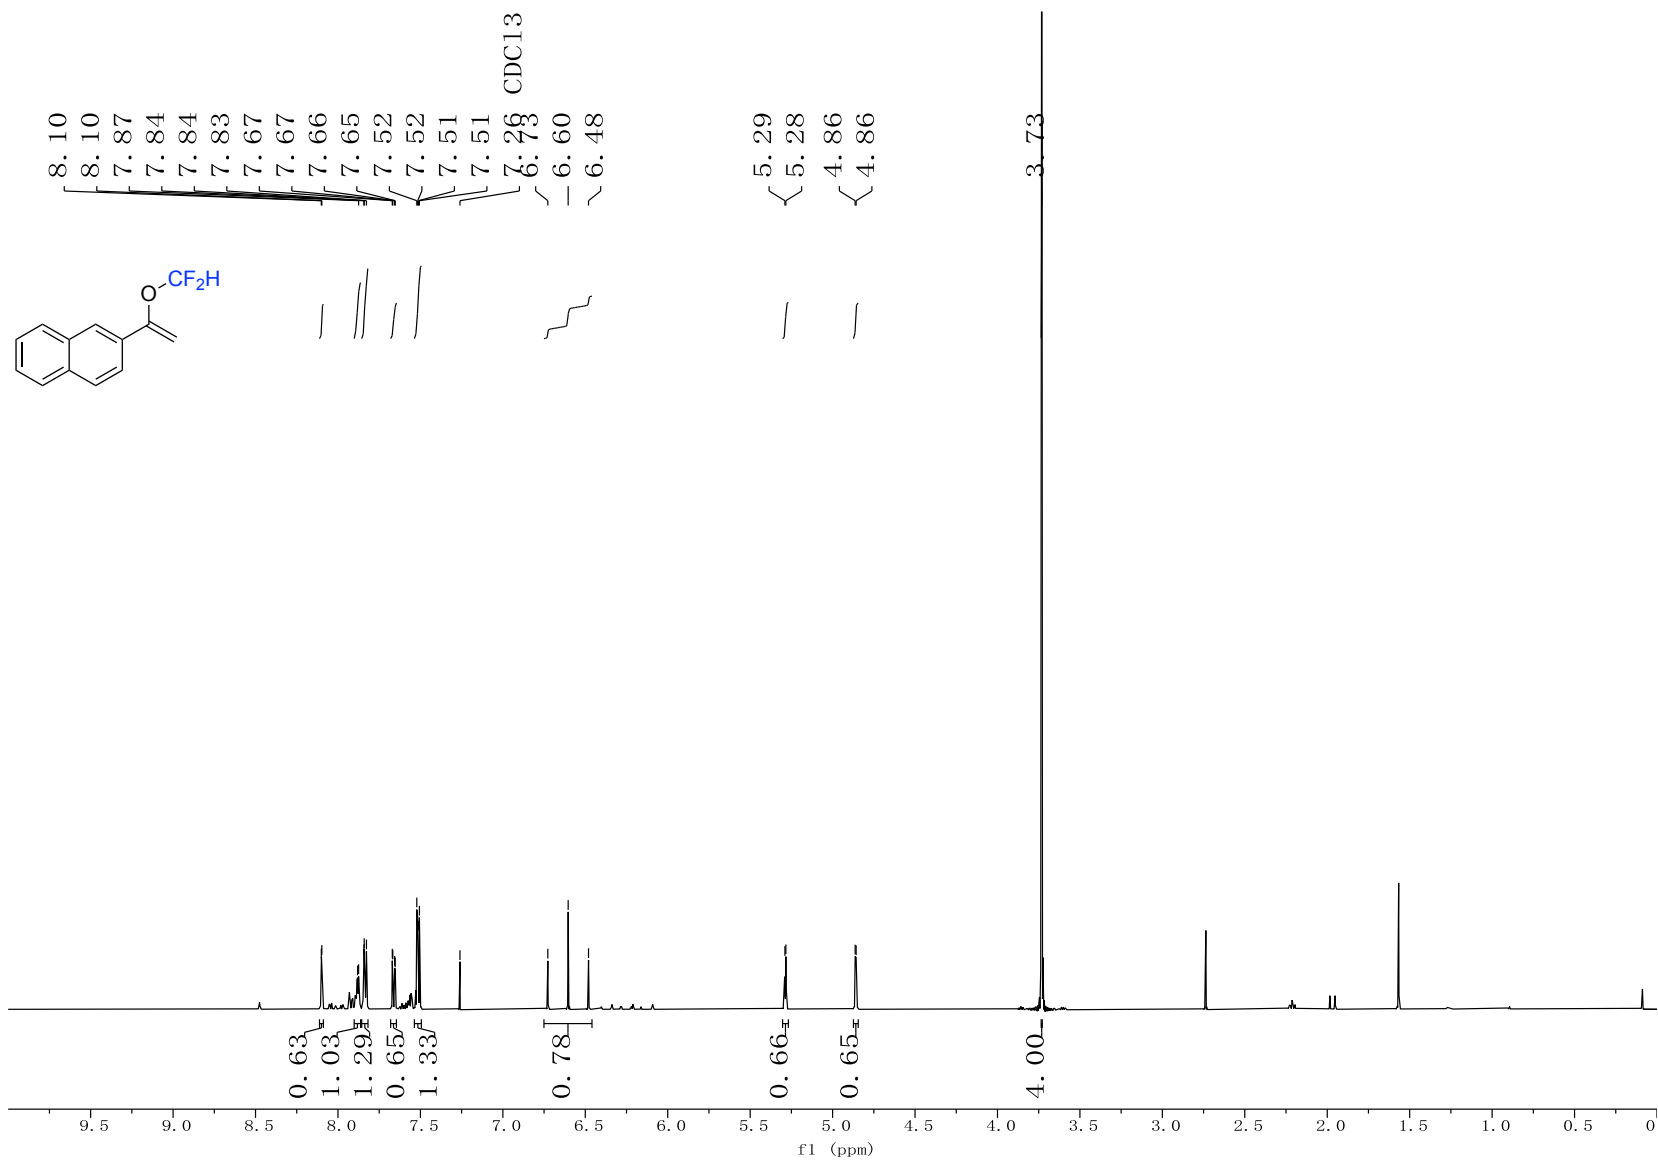

**<sup>19</sup>F NMR of the crude reaction mixture of 2-[1-(difluoromethoxy)vinyl]naphthalene (3i)**

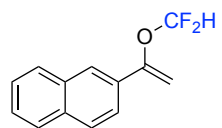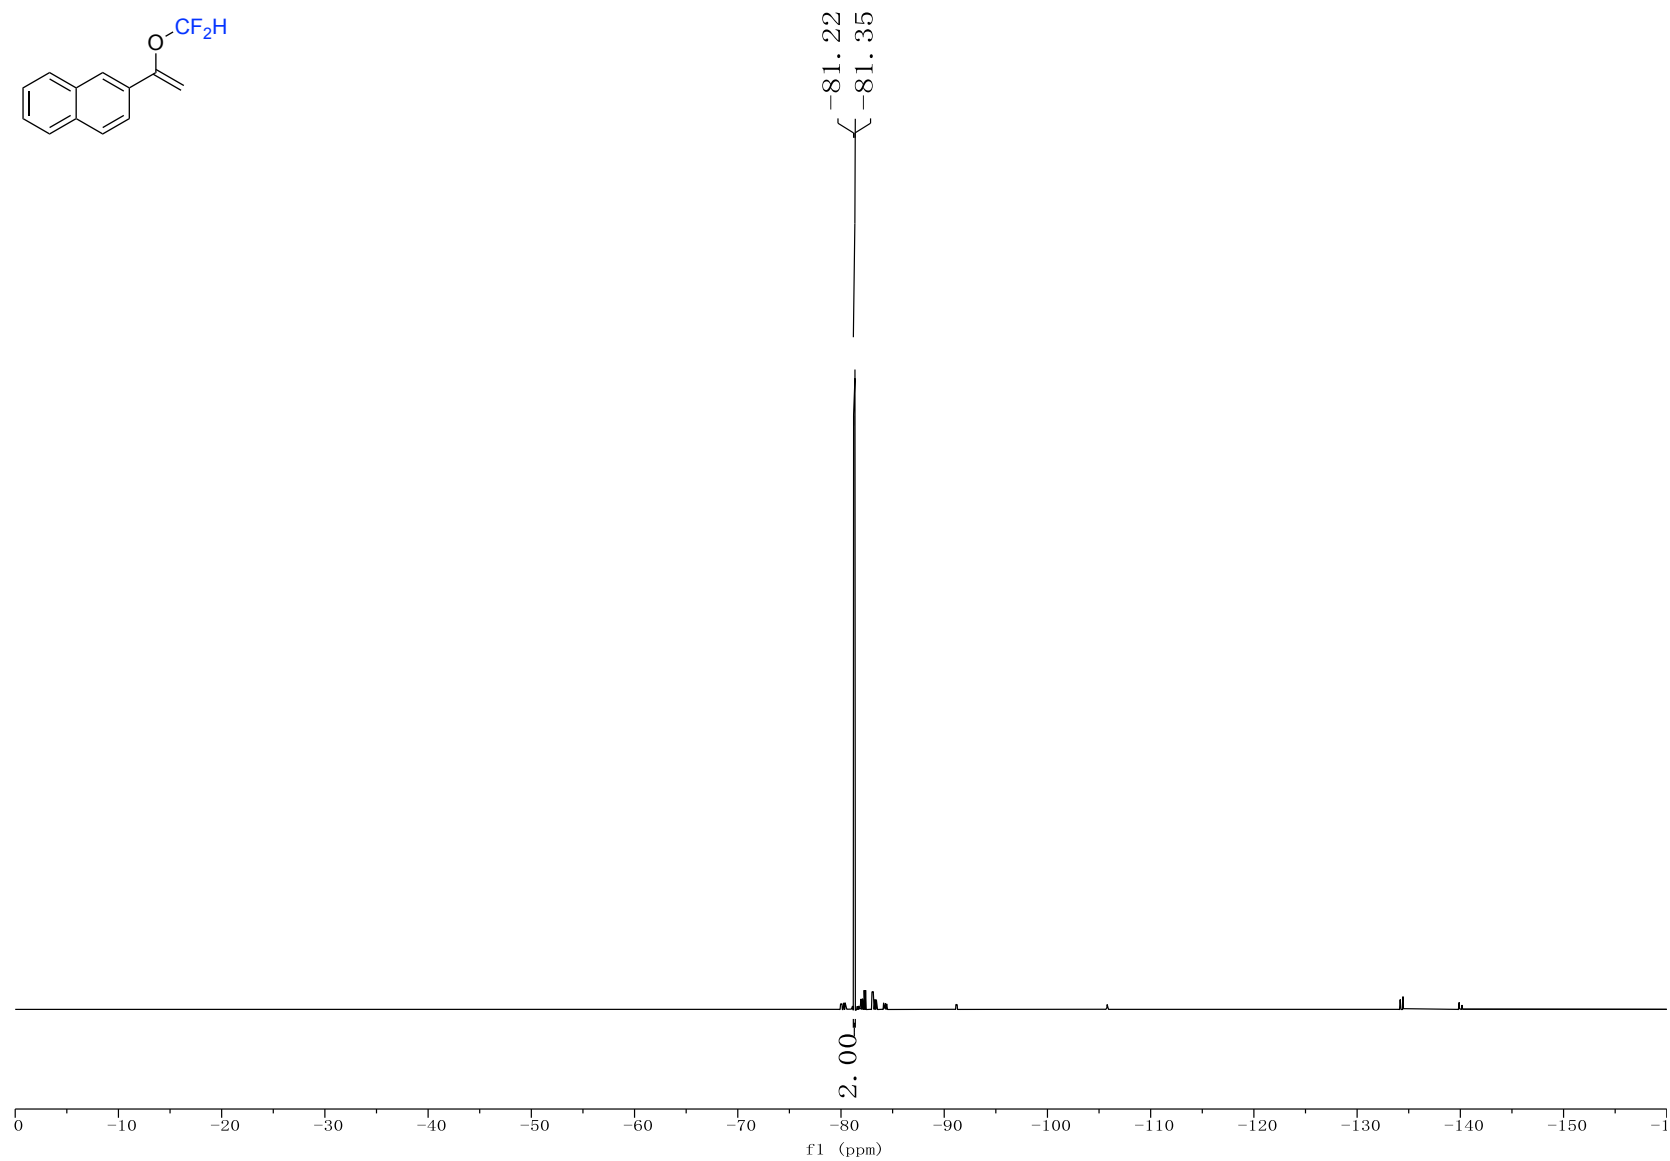

**$^{13}\text{C}\{^1\text{H}\}$  NMR of the crude reaction mixture of 2-[1-(difluoromethoxy)vinyl]naphthalene (3i)**

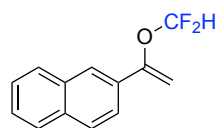

154.3  
133.7  
133.0  
130.7  
128.6  
128.3  
127.6  
126.9  
126.6  
124.9  
122.7  
117.6  
115.9  
114.2

— 93.7

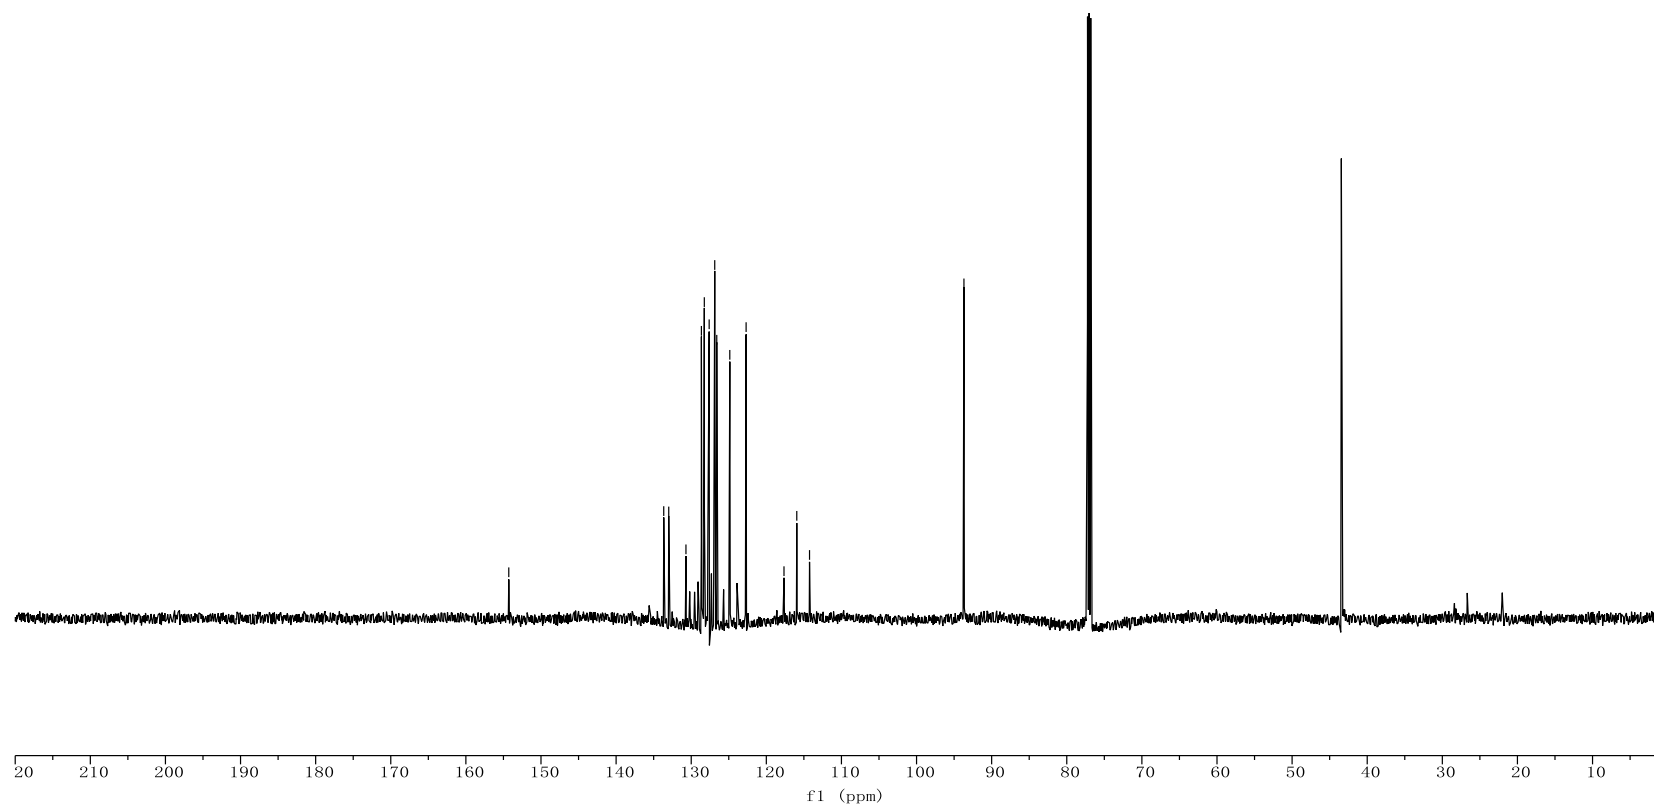



**<sup>1</sup>H NMR of the crude reaction mixture of [3-(difluoromethoxy)but-3-en-1-yl]benzene (3j)**

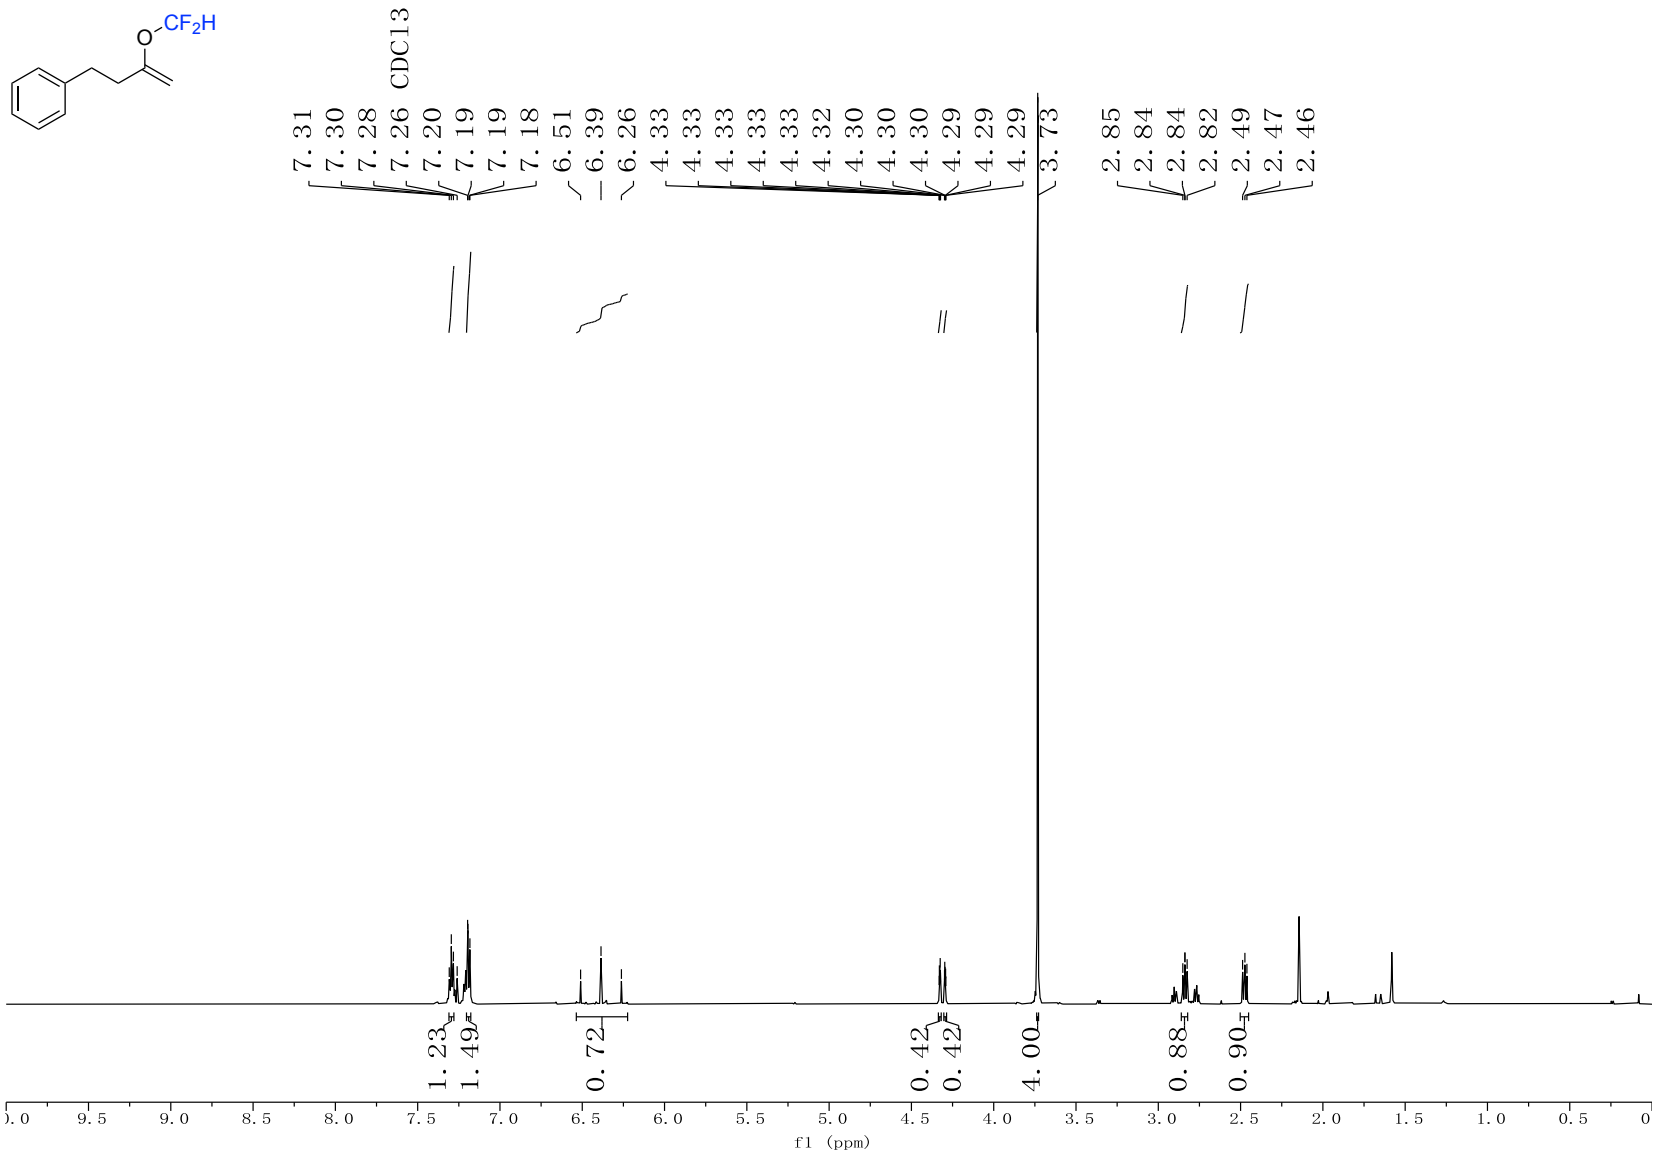

**<sup>19</sup>F NMR of the crude reaction mixture of [3-(difluoromethoxy)but-3-en-1-yl]benzene (3j)**

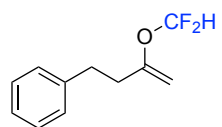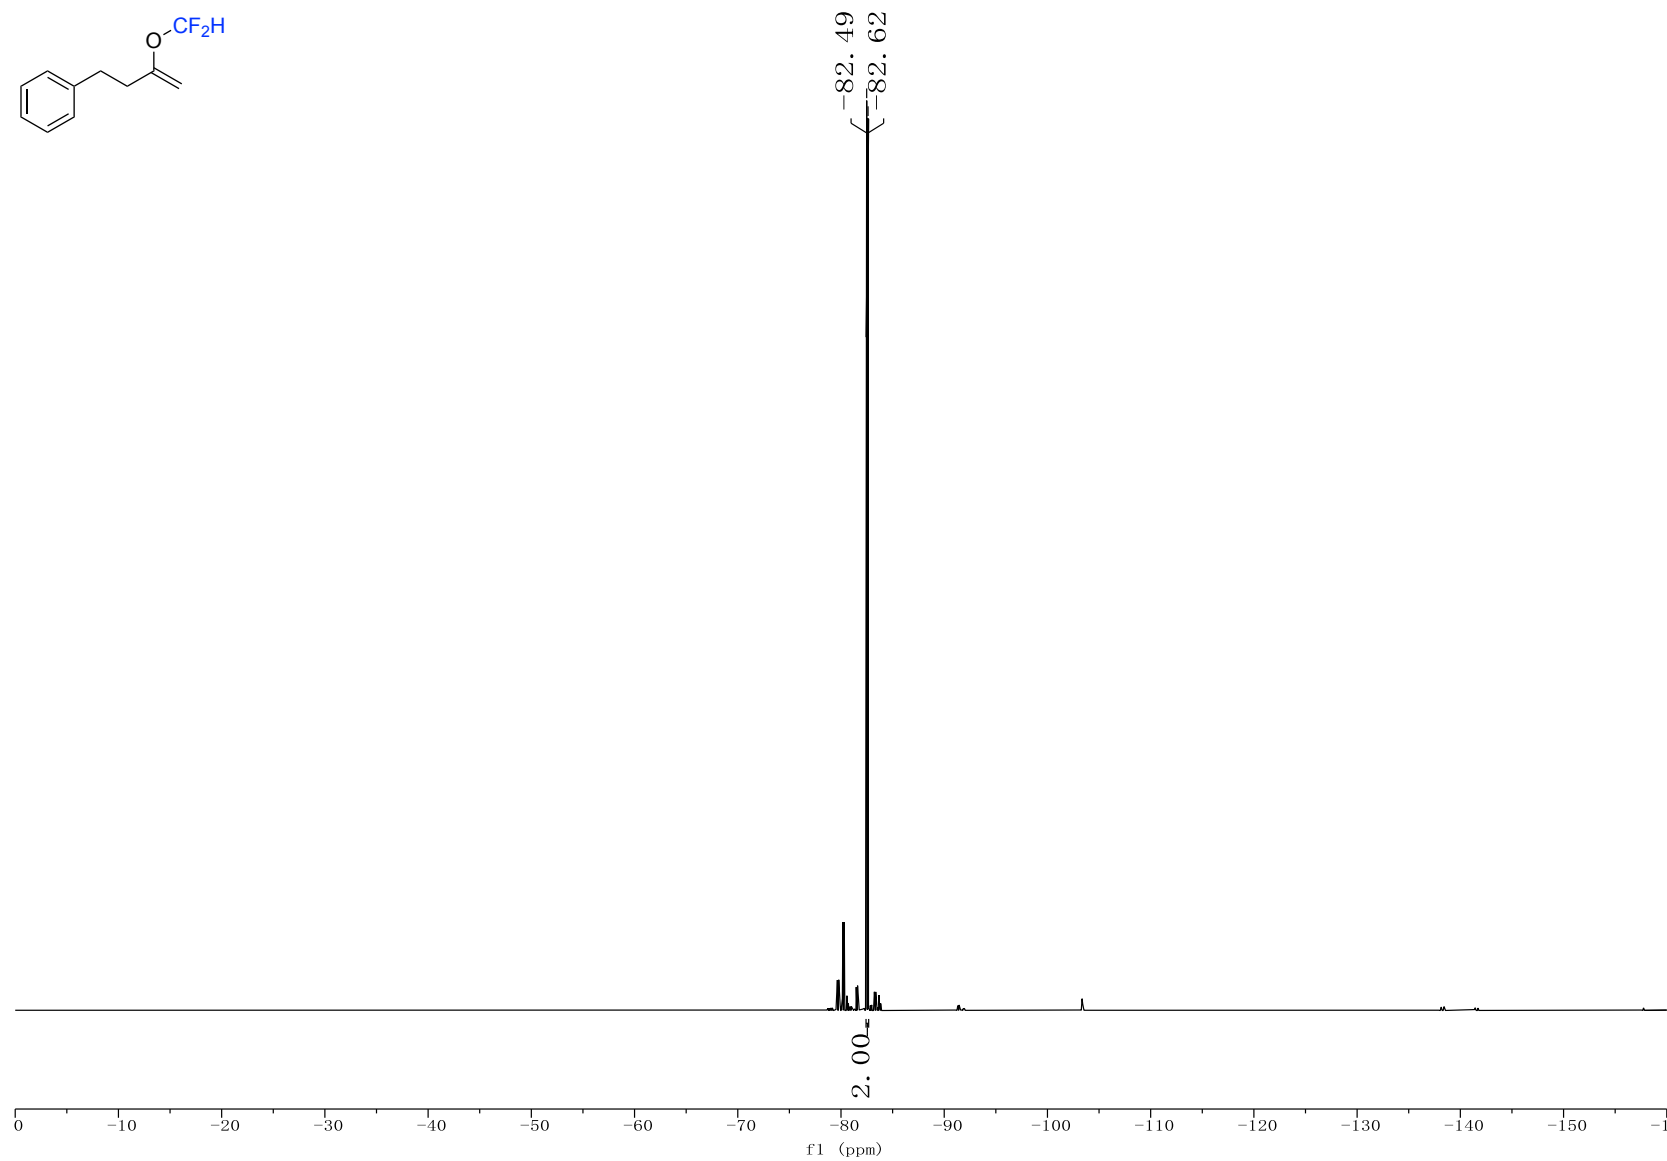

**$^{13}\text{C}\{^1\text{H}\}$  NMR of the crude reaction mixture of [3-(difluoromethoxy)but-3-en-1-yl]benzene (3j)**

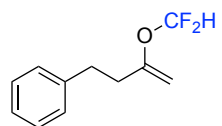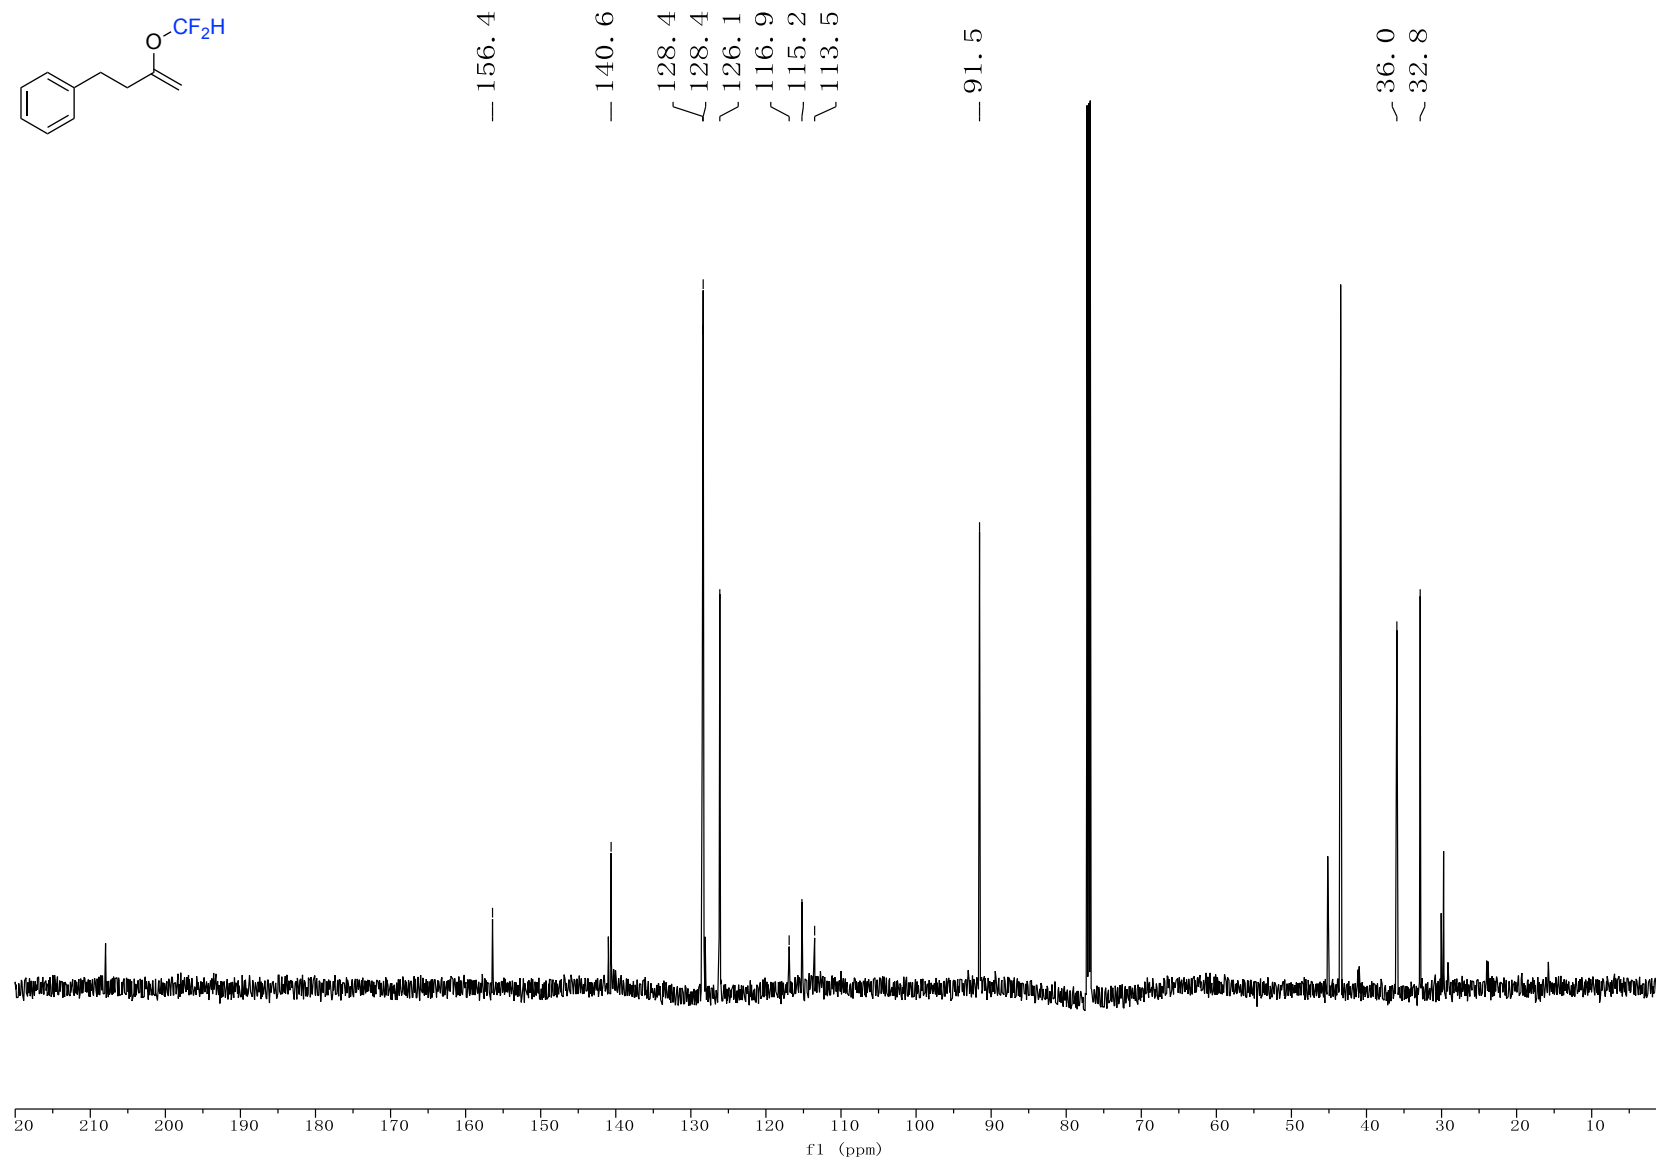

**<sup>1</sup>H NMR of 2,4-dichloro-1-[3-(difluoromethoxy)buta-1,3-dien-1-yl]benzene (3k)**

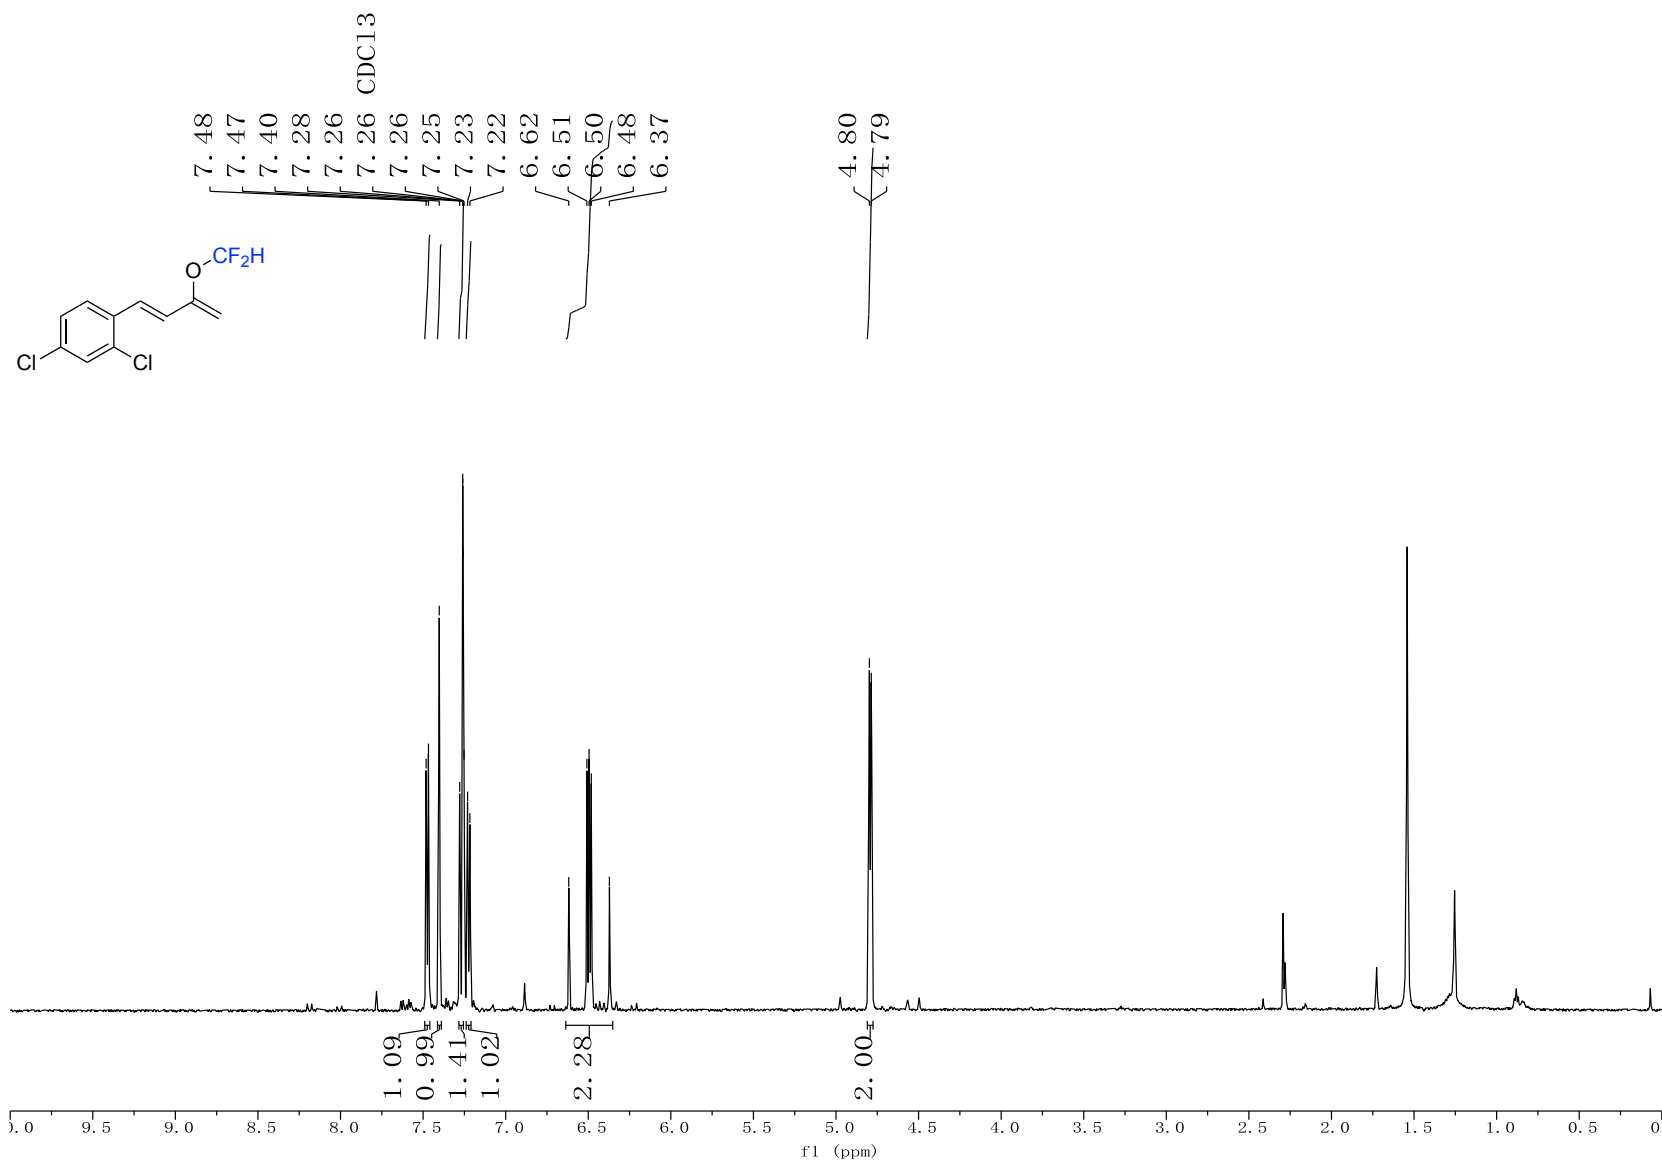

**<sup>19</sup>F NMR of 2,4-dichloro-1-[3-(difluoromethoxy)buta-1,3-dien-1-yl]benzene (3k)**

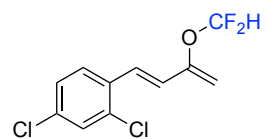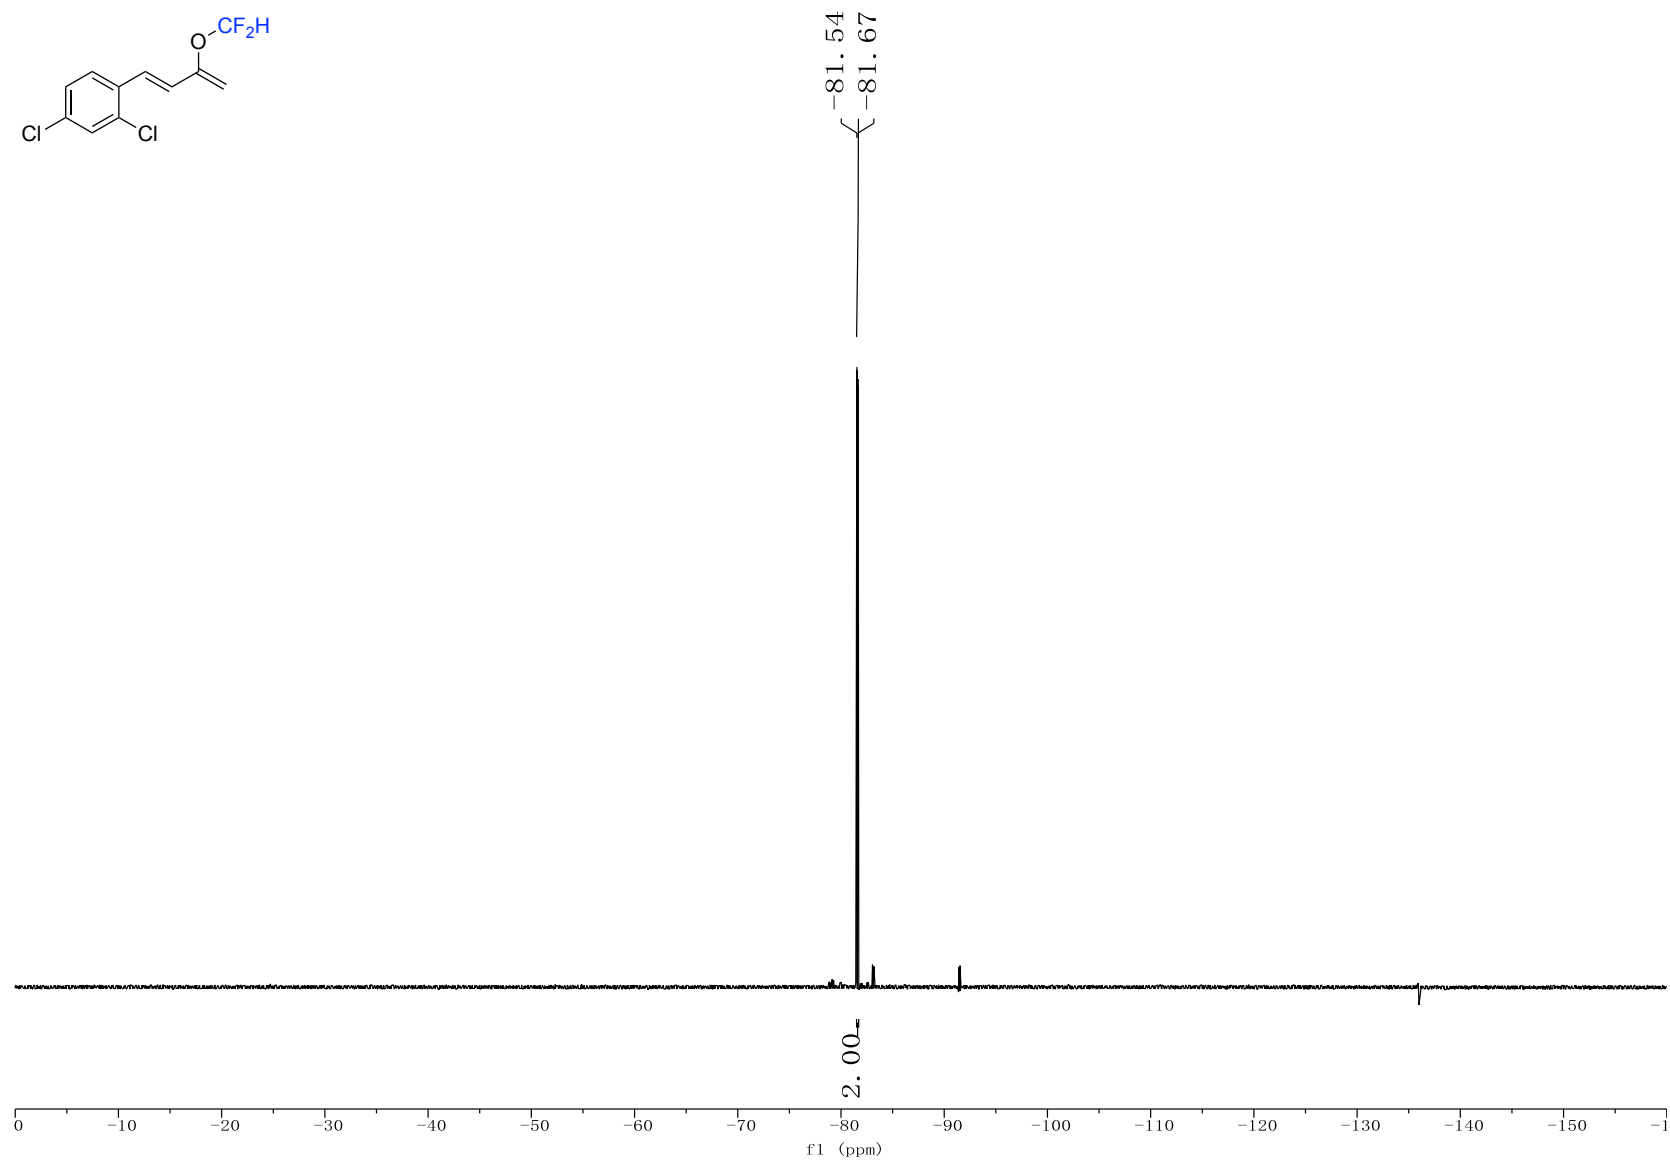

**$^{13}\text{C}\{^1\text{H}\}$  NMR of 2,4-dichloro-1-[3-(difluoromethoxy)buta-1,3-dien-1-yl]benzene (3k)**

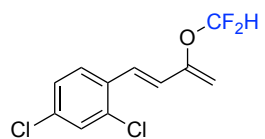

— 152.5  
134.4  
134.4  
132.8  
129.7  
127.5  
127.3  
126.0  
125.1  
117.2  
115.5  
113.8  
— 98.8

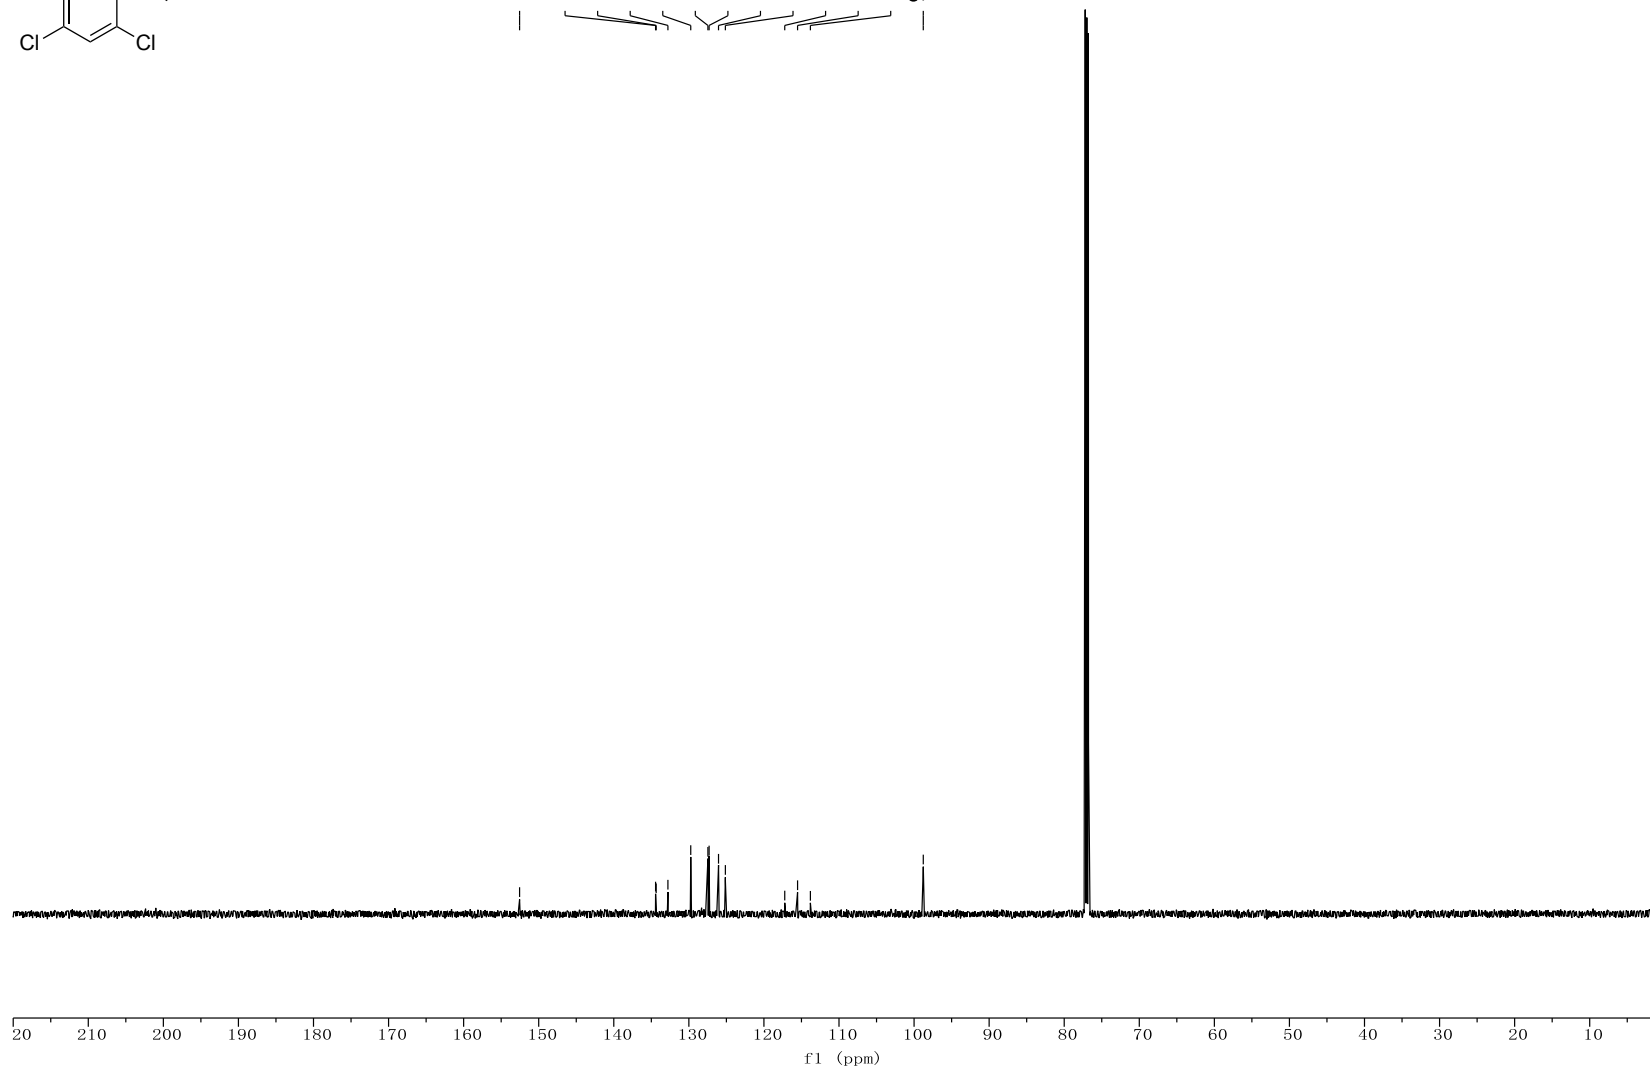

**<sup>1</sup>H NMR of 3-(difluoromethoxy)-1-phenylbut-2-en-1-one (3I)**

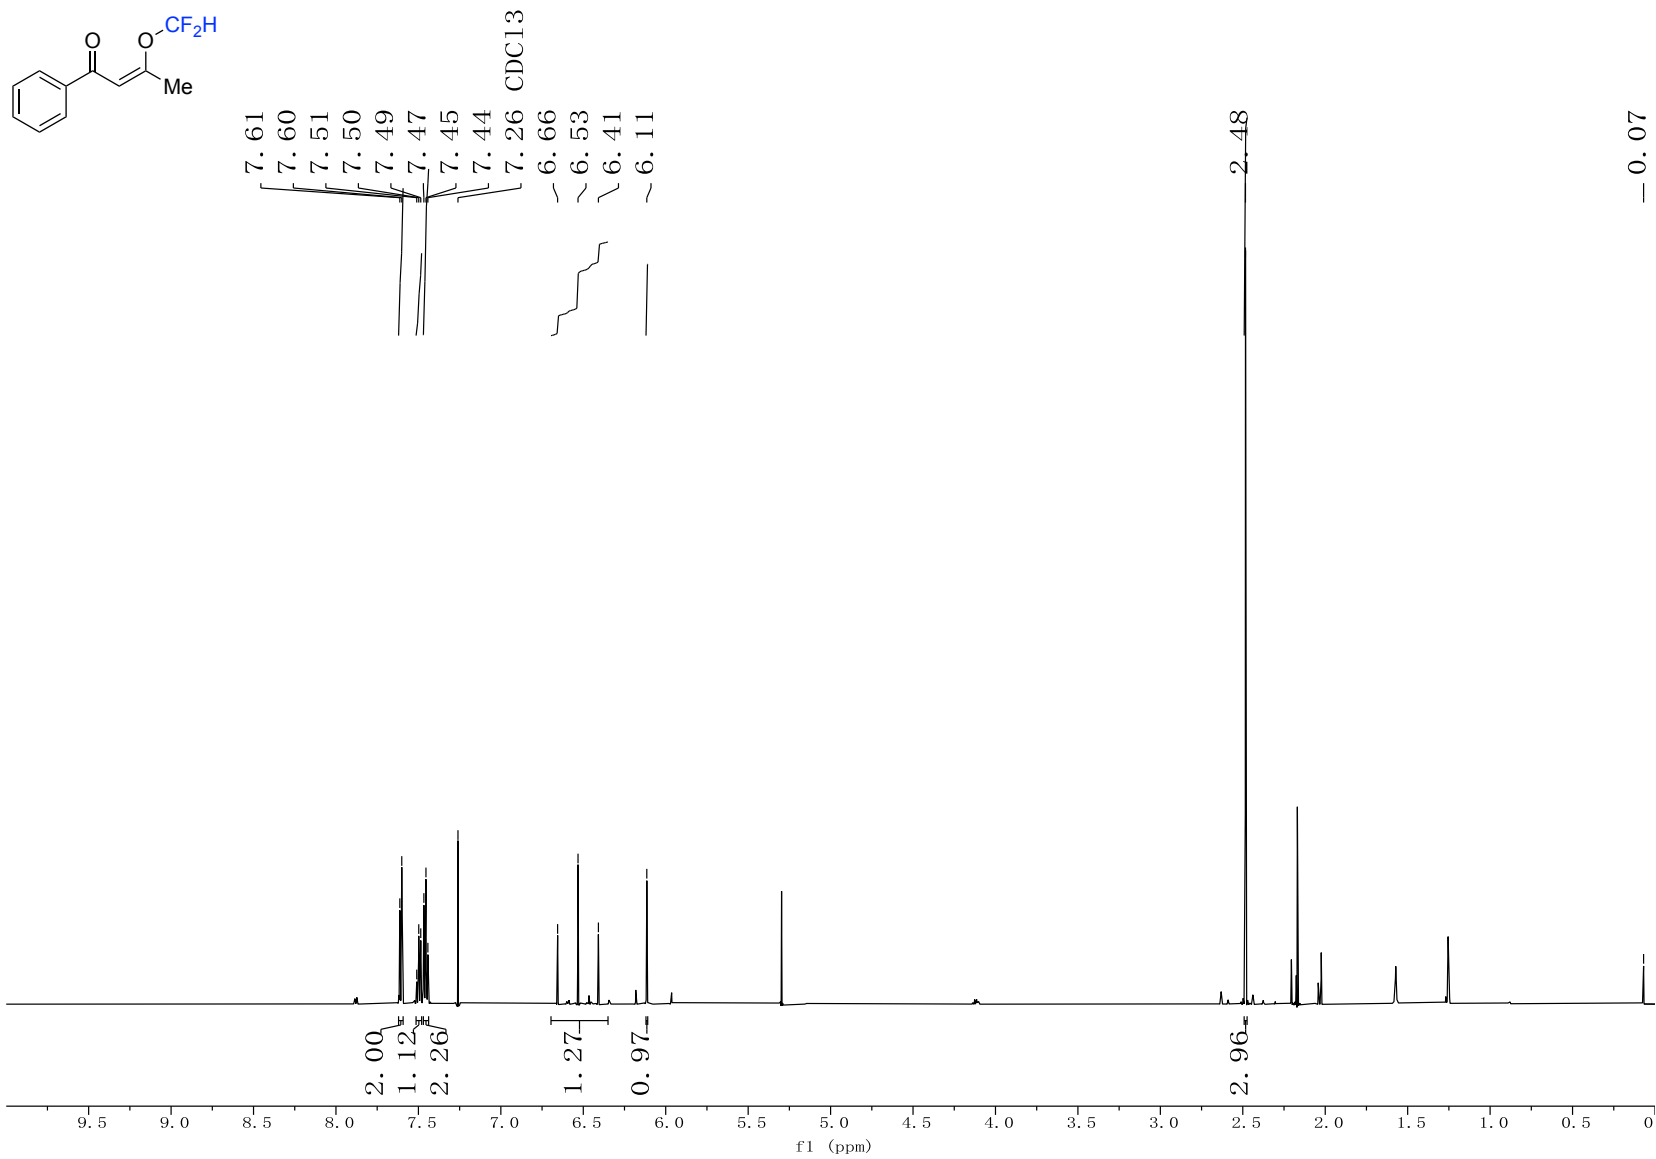

**<sup>19</sup>F NMR of 3-(difluoromethoxy)-1-phenylbut-2-en-1-one (3I)**

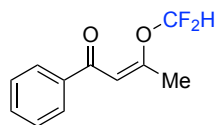

-82.42  
-82.55

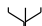

2.00

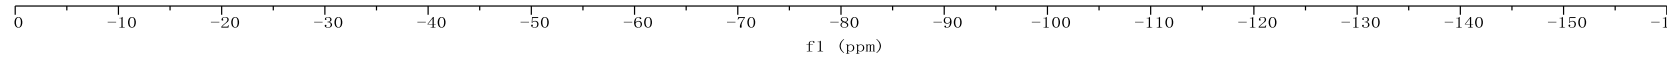



**$^{13}\text{C}\{^1\text{H}\}$  NMR of 3-(difluoromethoxy)-1-phenylbut-2-en-1-one (3I)**

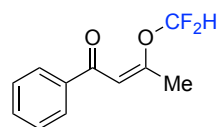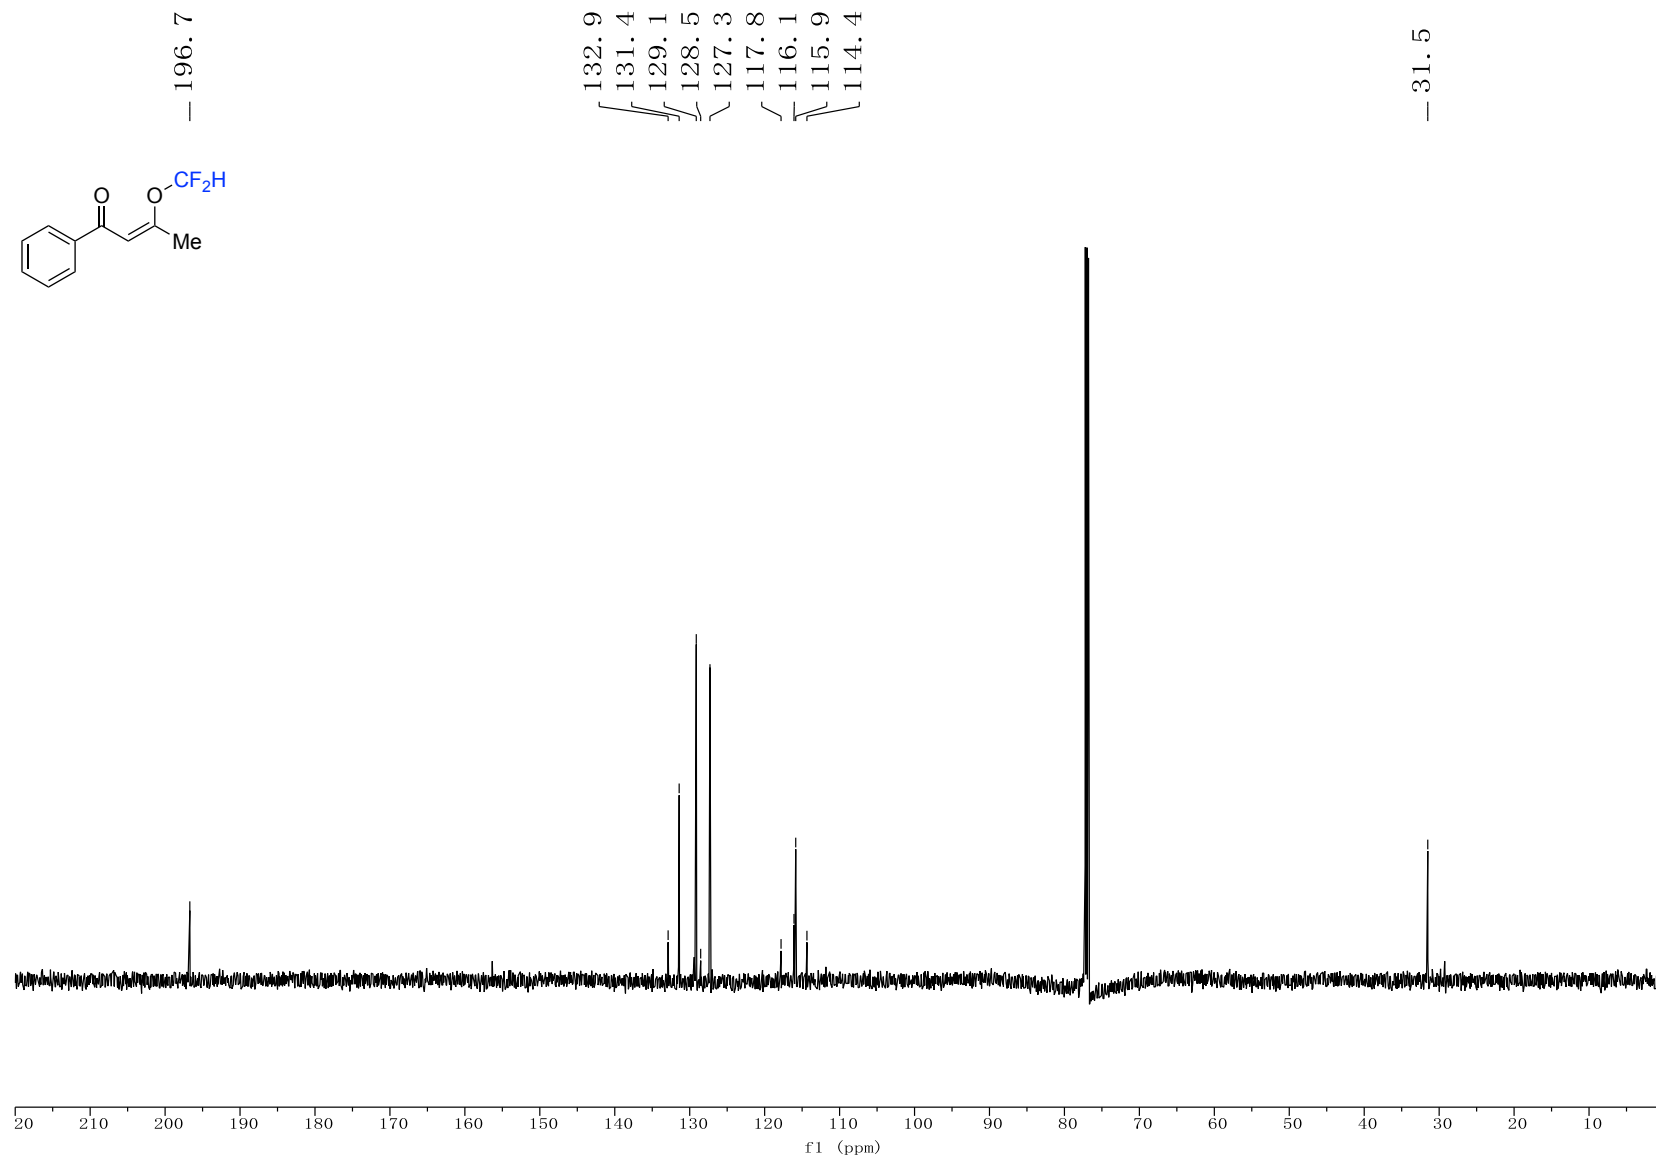

**<sup>1</sup>H NMR of the crude reaction mixture of 4-(difluoromethoxy)-2H-chromene (3m)**

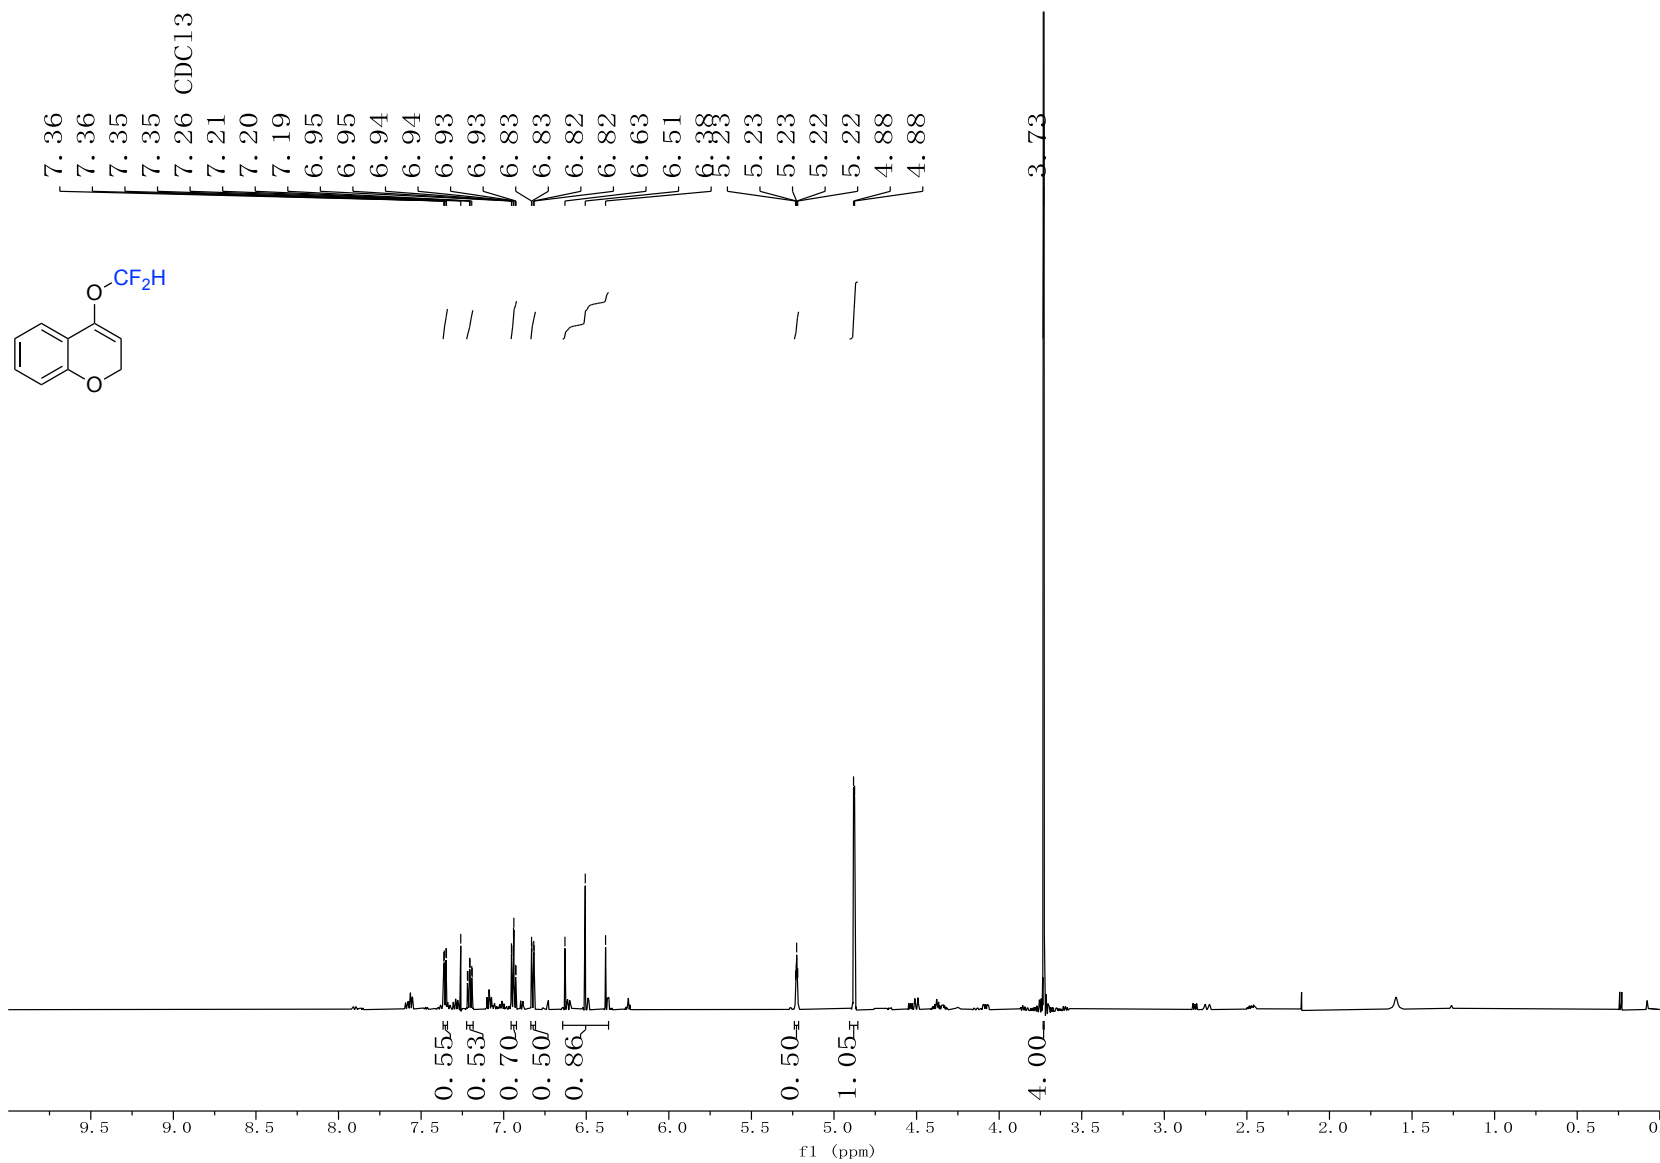

**<sup>19</sup>F NMR of the crude reaction mixture of 4-(difluoromethoxy)-2H-chromene (3m)**

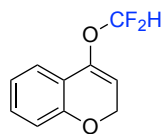

{ -81.70  
-81.83

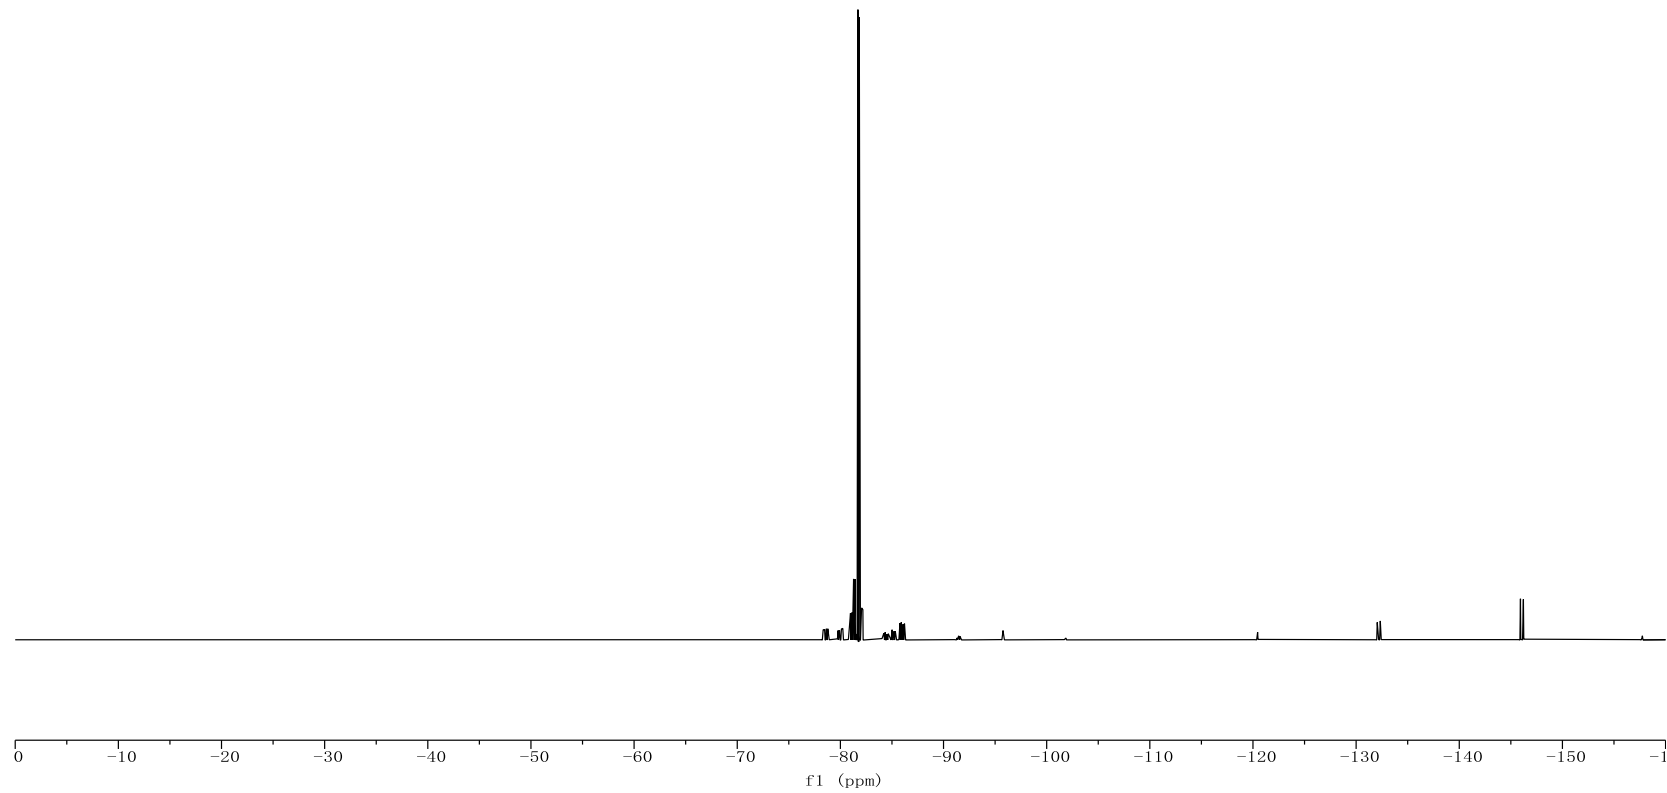

**$^{13}\text{C}\{^1\text{H}\}$  NMR of the crude reaction mixture of 4-(difluoromethoxy)-2H-chromene (3m)**

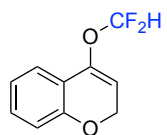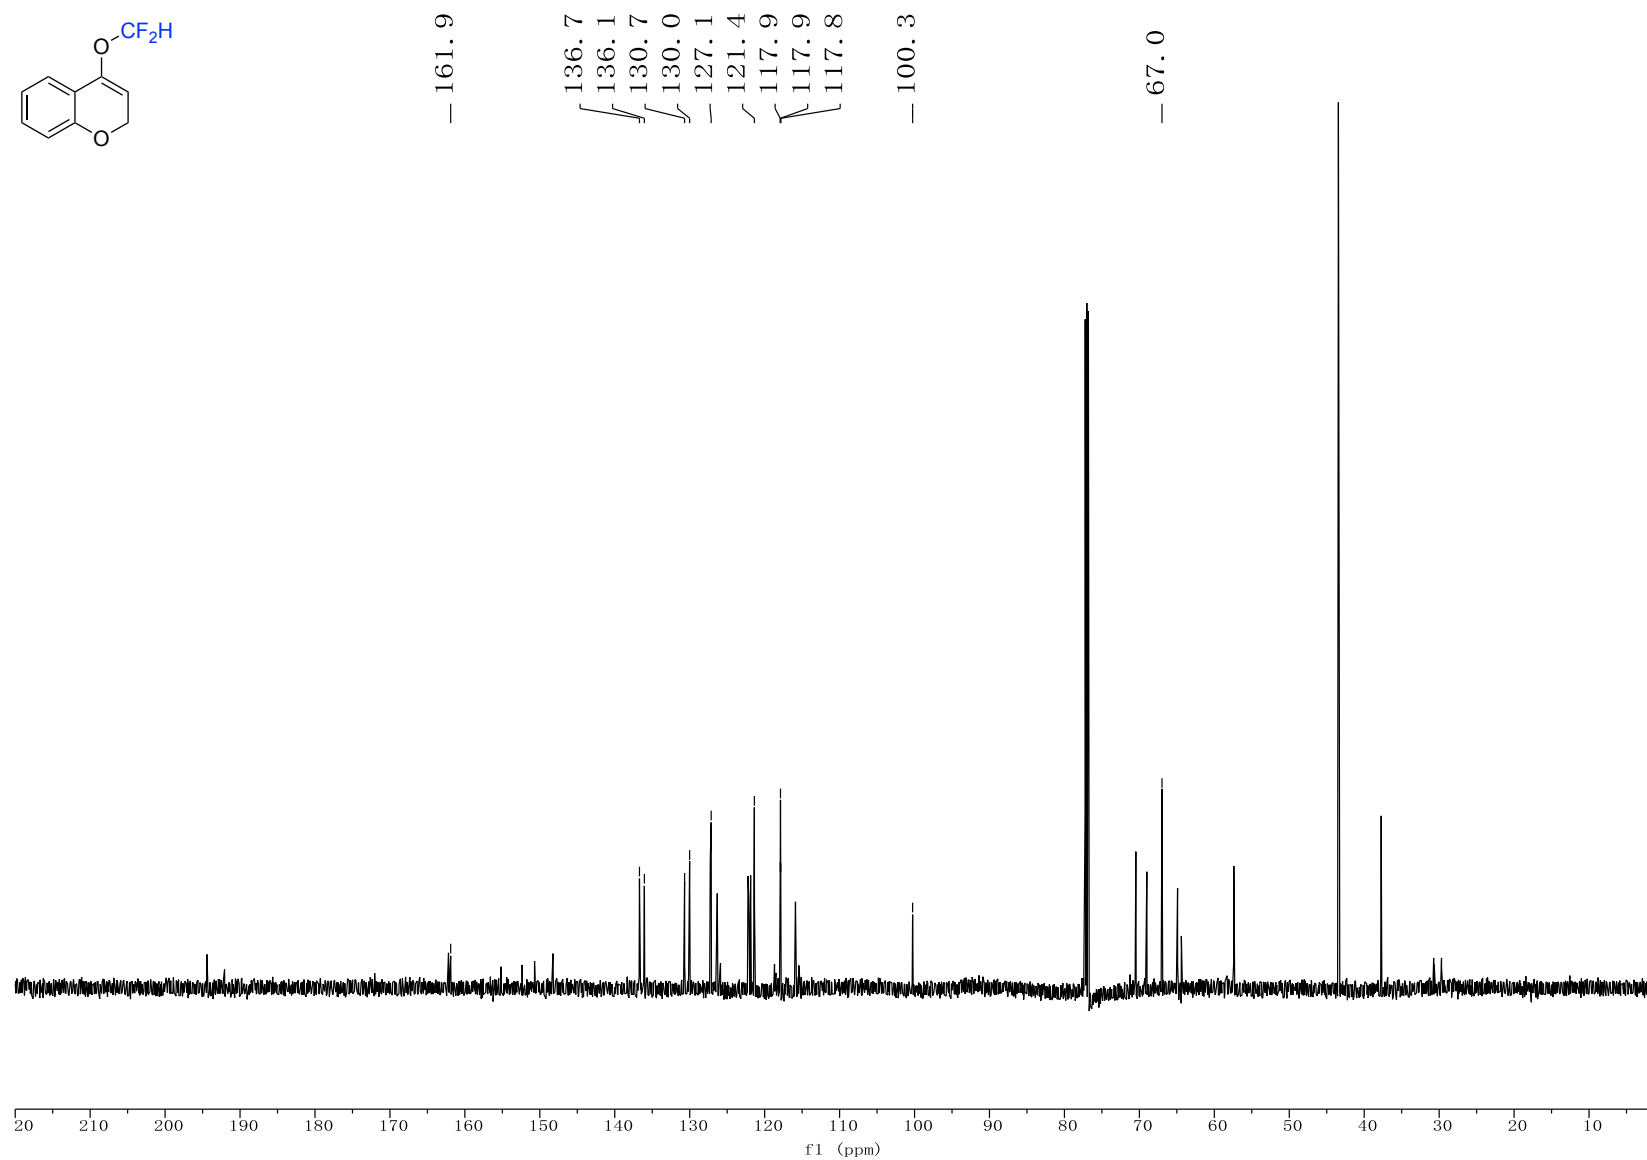

**<sup>1</sup>H NMR of the crude reaction mixture of 1-(difluoromethoxy)-7-phenylcyclohept-1-ene (3n)**

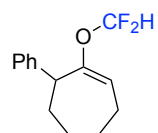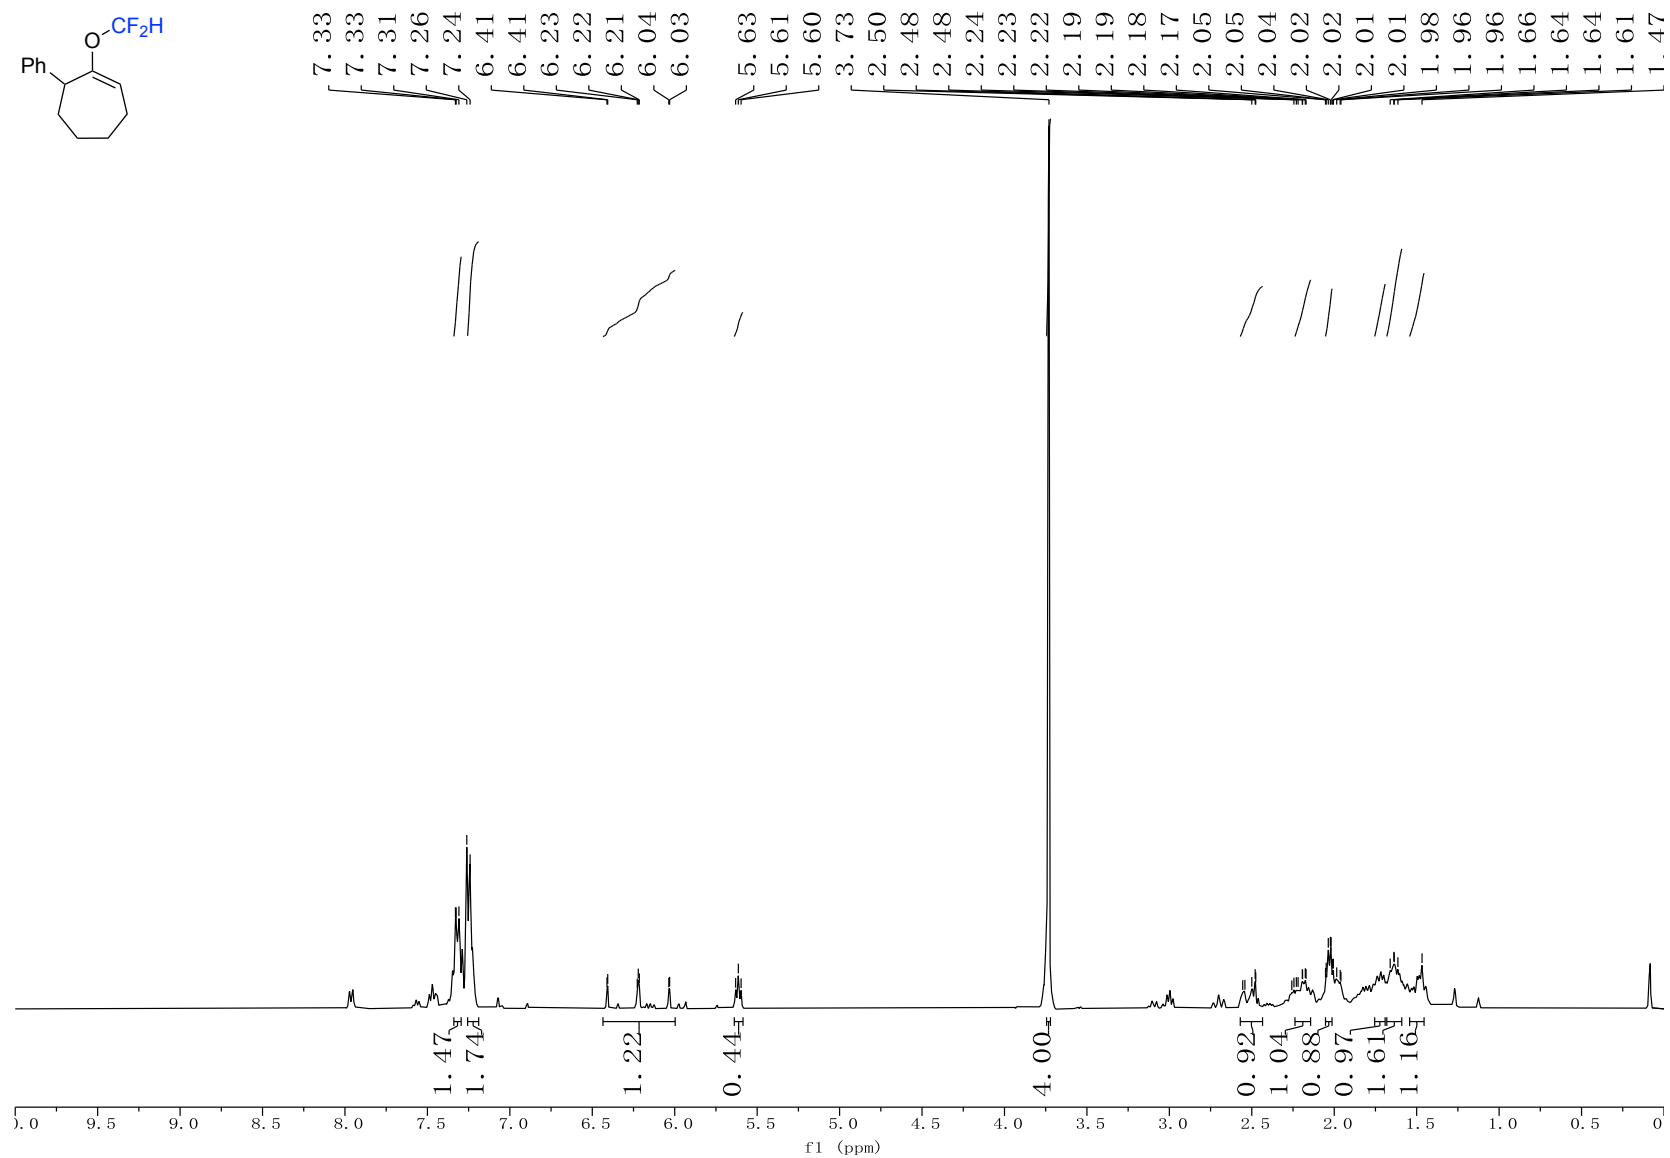

**<sup>19</sup>F NMR of the crude reaction mixture of 1-(difluoromethoxy)-7-phenylcyclohept-1-ene (3n)**

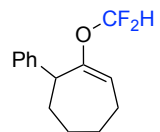

{  
-80.24  
-80.43

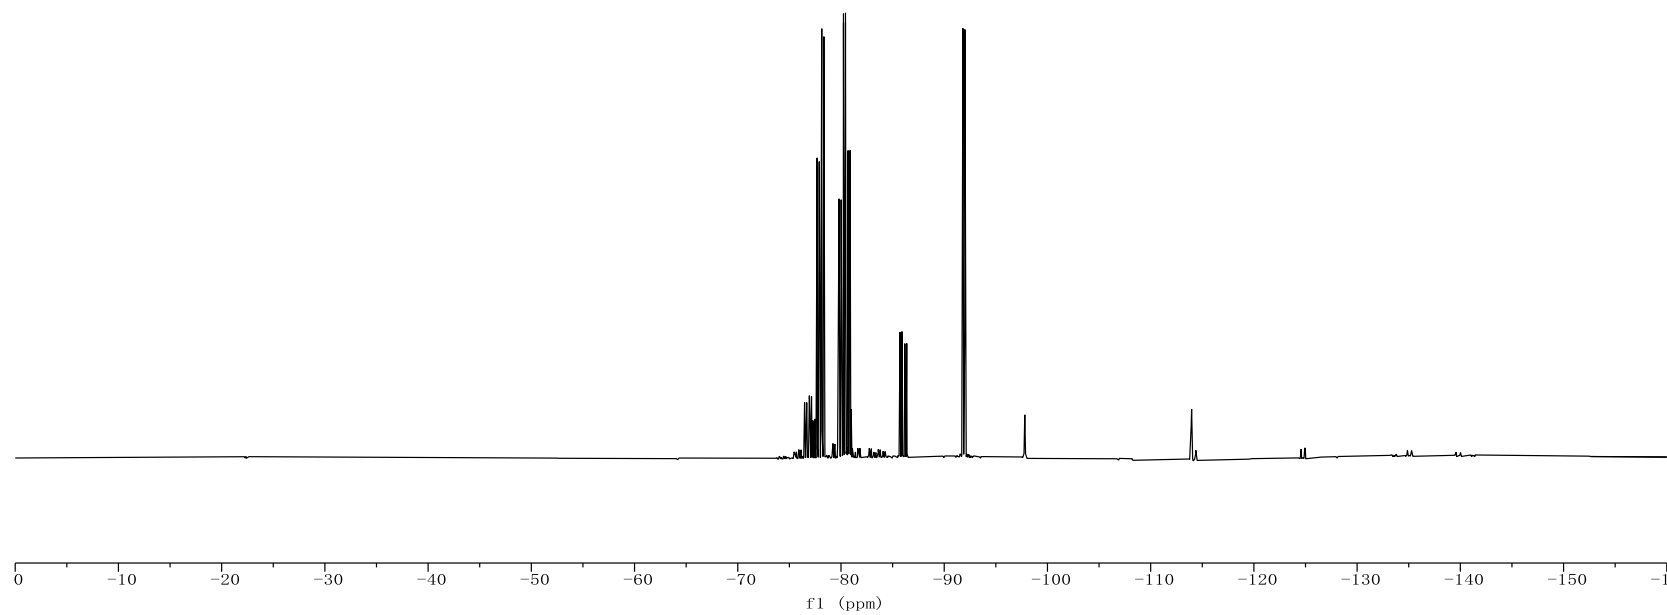

**$^{13}\text{C}\{^1\text{H}\}$  NMR of the crude reaction mixture of 1-(difluoromethoxy)-7-phenylcyclohept-1-ene (3n)**

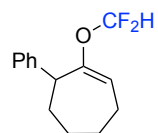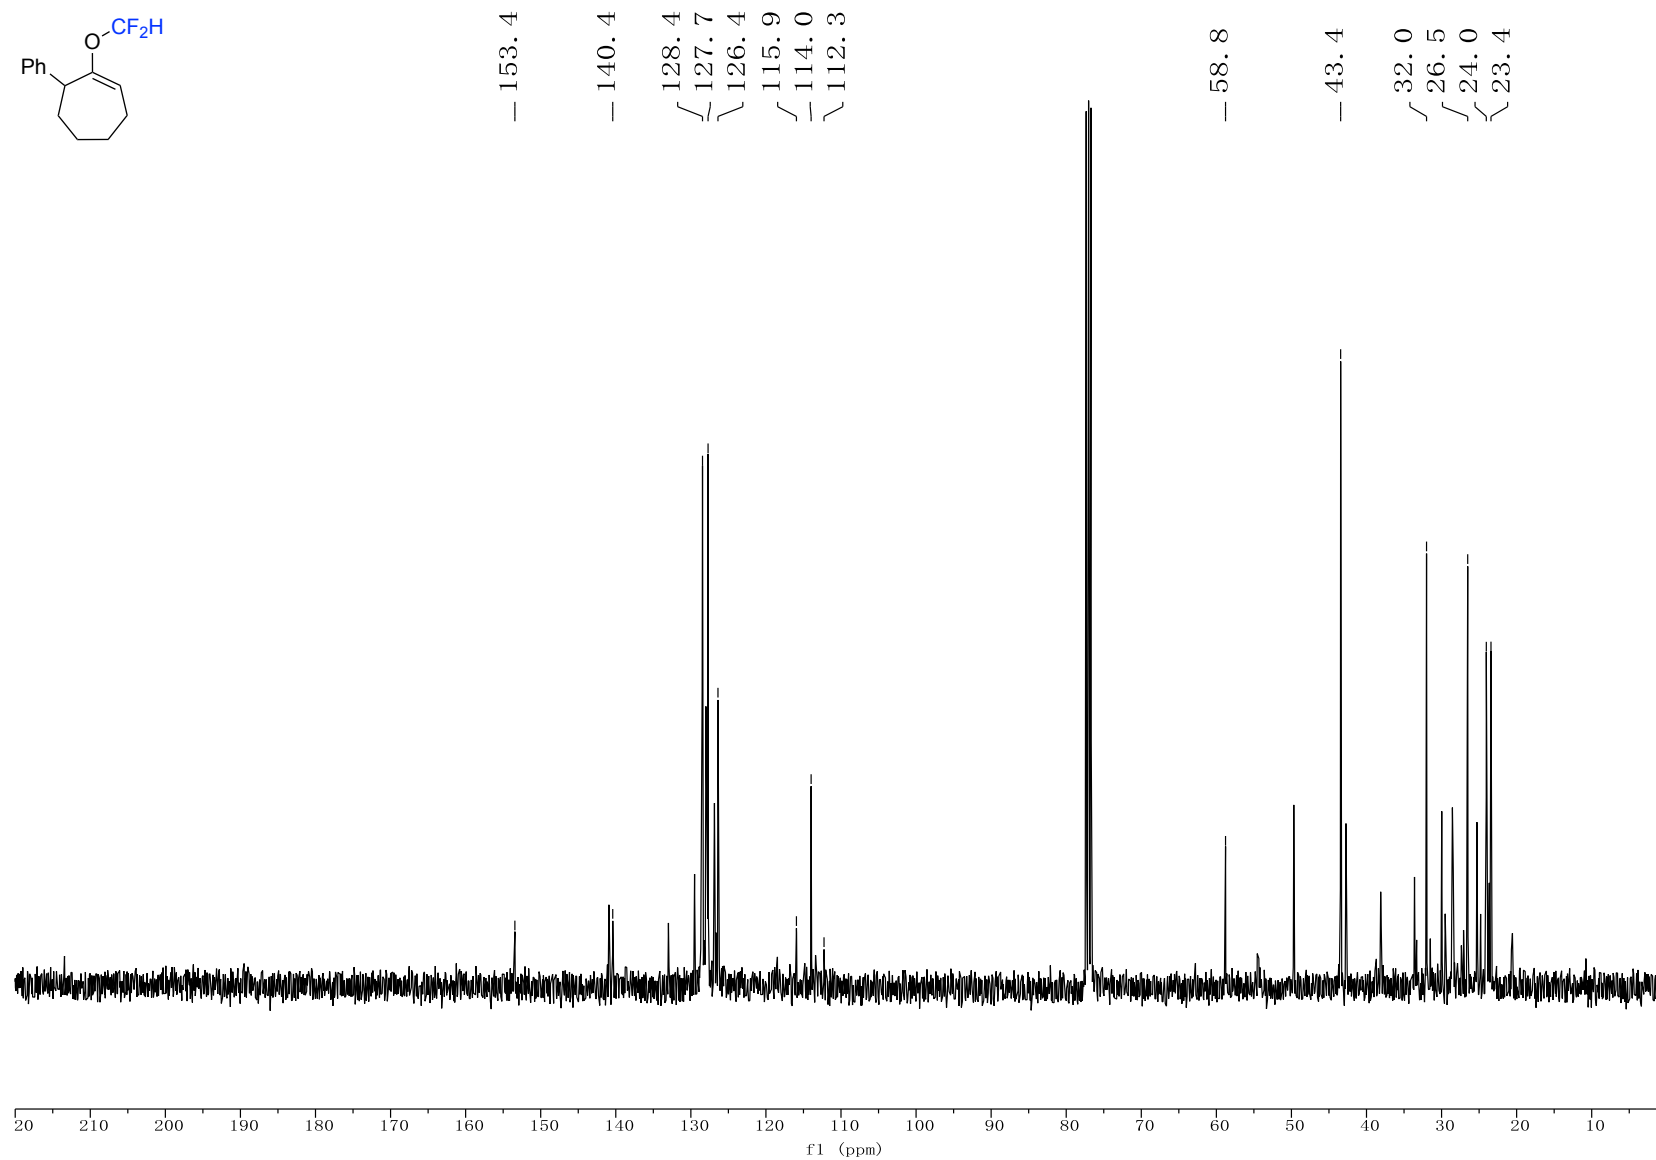

Supplement: Additional file 1 [file 1860-5397-20-235-S1.pdf]
